# Supplementary material for: Electrochemical oxidative cross coupling of NH-sulfoximines with disulfides
Source: Royal Society of Chemistry journal article supplement (doi:10.1039/d3nj05205b), 2024-01-01

# Supporting Information

## Electrochemical Oxidative Cross Coupling of *NH*- Sulfoximines with Disulfides

Shuai Zhang, Meiqian Hu, Changsheng Qin, Shoucai Wang, Fanghua Ji,\*

Guangbin Jiang\*

Guangxi Key Laboratory of Electrochemical and Magneto-chemical Functional Materials,  
College of Chemistry and Bioengineering, Guilin University of Technology, Guilin 541004,

People's Republic of China

*E-mail: jianggb@glut.edu.cn, fanghuaji@glut.edu.cn*

### Table of Contents

|                                                                        |            |
|------------------------------------------------------------------------|------------|
| <b>A. Instrumentation and Chemicals.....</b>                           | <b>S2</b>  |
| <b>B. Experimental Procedure .....</b>                                 | <b>S3</b>  |
| <b>C. Optimization of the Reaction Conditions .....</b>                | <b>S9</b>  |
| <b>D. Gram-scale Experiment.....</b>                                   | <b>S13</b> |
| <b>E. Biological Applications.....</b>                                 | <b>S14</b> |
| <b>F. Control Experiments .....</b>                                    | <b>S16</b> |
| <b>G. Cyclic Voltammetry Experiments .....</b>                         | <b>S18</b> |
| <b>H. Validation Experiment of I<sub>2</sub> .....</b>                 | <b>S26</b> |
| <b>I. Electrode Stability and Reusability Experiments.....</b>         | <b>S28</b> |
| <b>J. Characterizing Data.....</b>                                     | <b>S31</b> |
| <b>K. References .....</b>                                             | <b>S58</b> |
| <b>L. Copies of <sup>1</sup>H and <sup>13</sup>C NMR Spectra .....</b> | <b>S60</b> |

## A. Instrumentation and Chemicals

All purchased reagents and solvents were used without further purification unless otherwise noted. All the electrochemical reactions were performed in an undivided cell unless otherwise noted. Cell lines of HeLa (Human cervical cancer cell line), MCF-7 (human breast cancer cells), HepG-2 (Hepatocellular carcinoma cells), and A549 (Human lung carcinoma cells) were purchased from the American Type Culture Collection. The electrolysis instrument used is an adjustable DC regulated power supply (PGD-2303S) (Taiwan Gwinstek Electronic Technology Co., Ltd.). Cyclic voltammograms were obtained on a CHI 760E potentiostat (CH Instruments, Inc.). All the thioether, electrolyte, and redox mediators were purchased from WuXi AppTec. TecAnalytical thin-layer chromatography was performed by using commercially prepared 100-400 mesh silica gel plates (GF<sub>254</sub>) and visualization was effected at 254 nm. *NH*-sulfoximines, *NH*-sulfonimidamides and disulfides were prepared according to known procedures. The ES20B-H<sub>2</sub> detector is employed for the purpose of hydrogen production detection. <sup>1</sup>H and <sup>13</sup>C NMR spectra were recorded using a Bruker DRX-400 spectrometer using CDCl<sub>3</sub> or DMSO-*d*<sub>6</sub> as solvent. The chemical shifts of CDCl<sub>3</sub> are referenced to signals at 7.26 and 77.0 ppm, respectively. The chemical shifts of DMSO-*d*<sub>6</sub> are referenced to signals at 2.50 and 39.5 ppm, respectively. Mass spectra were recorded on a Thermo Scientific ISQ gas chromatograph-mass spectrometer. The data of HRMS was carried out on a high-resolution mass spectrometer (LCMS-IT-TOF). Melting points were determined with a Büchi Melting Point B-545 instrument.

## B. Experimental Procedure

### B1.1 General Procedure for Synthesis of **2m**<sup>[6]</sup>, **2n**<sup>[6]</sup> and **2o**<sup>[10]</sup>

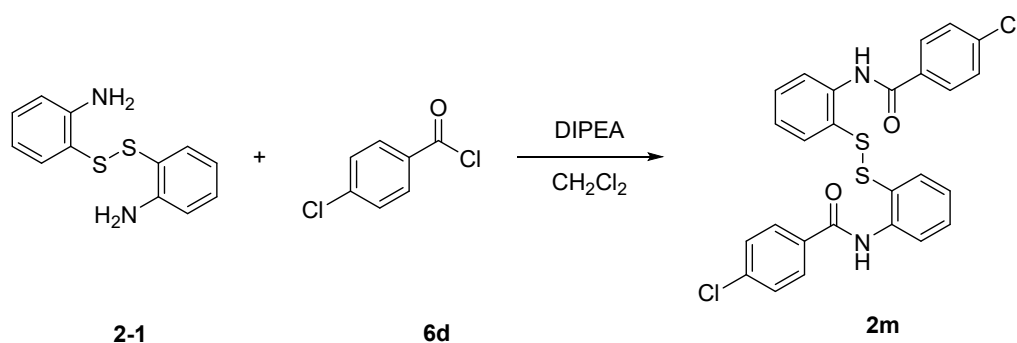

The compound was synthesized according to the reported procedures. 4-Chlorobenzoyl chloride **6d** (1.08 mL, 8.46 mmol) was added to a solution of 2,2'-Diaminodiphenyl disulfide **2-1** (1000 mg, 4.03 mmol) in *N,N*-diisopropylethylamine (DIPEA) (1.75 mL, 10.1 mmol) and CH<sub>2</sub>Cl<sub>2</sub> (13.4 mL). After stirring at rt for 2 h, the resulting white precipitate was collected and washed with water (20 mL). The resulting solid was dried at rt to afford **2m** as a white solid.

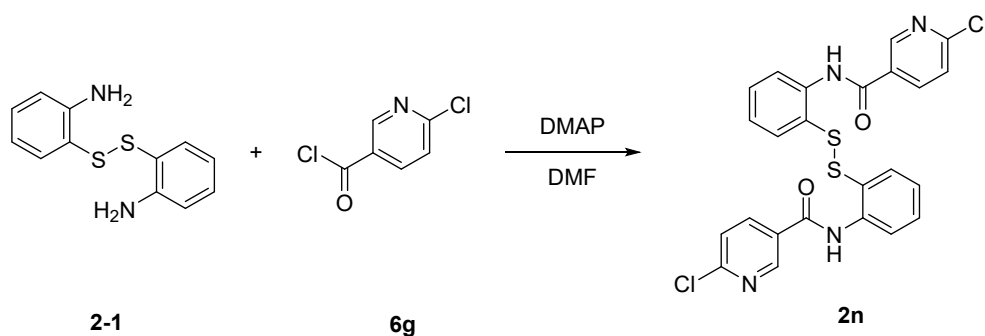

The compound was synthesized according to the reported procedures. 4-dimethylaminopyridine (DMAP) (0.590 mL, 4.82 mmol) and 6-chloronicotinoyl chloride **6g** (850 mg, 4.82 mmol) were added to a solution of 2,2'-Diaminodiphenyl disulfide **2-1** (500 mg, 2.01 mmol) in *N,N*-dimethylformamide (DMF) (10 mL).

After stirring at rt for 9 h, DMF was removed and washed successively with water and EtOH. Recrystallization from  $\text{CHCl}_3$  gave **2n** as colorless needles.

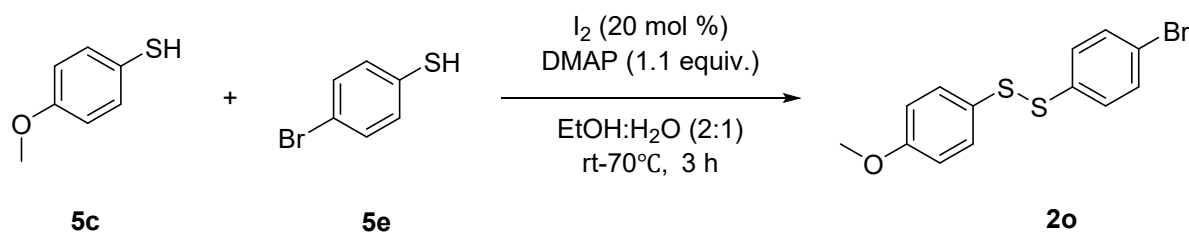

To a round bottom flask was added thiol **5c** (3.6 mmol, 505 mg, 1.0 equiv.), thiol **5e** (3.6 mmol, 681 mg, 1.0 equiv.) in a mixed solvent system (EtOH/H<sub>2</sub>O, 2:1, 10 mL) and stirred at room temperature. Base (DMAP, 4.2 mmol, 520 mg, 1.2 equiv.) was added to the above reaction mixture and stirred for five minutes at room temperature. Then added molecular iodine (0.72 mmol, 200 mg, 0.2 equiv.) into it and stirred at 70 °C for 3 h. Upon completion the reaction was quenched with saturated  $\text{Na}_2\text{S}_2\text{O}_3$  solution. The organic layer was extracted with ethyl acetate (20 mL  $\times$  3), dried over anhydrous  $\text{Na}_2\text{SO}_4$  and the solvent was removed under reduced pressure. The residue was chromatographed through silica gel eluting with petroleum ether/ethyl acetate to give the desired products **2o**.

## B1.2 The Materials Used to Make the Electrolytic Cell

All the materials used to make the electrolytic cell were commercially available. The anode used graphite rod ( $\varphi= 0.6$  cm, working height = 1.5 cm) and cathode used platinum plate electrodes ( $1.0$  cm  $\times$   $1.0$  cm  $\times$   $0.01$  cm).

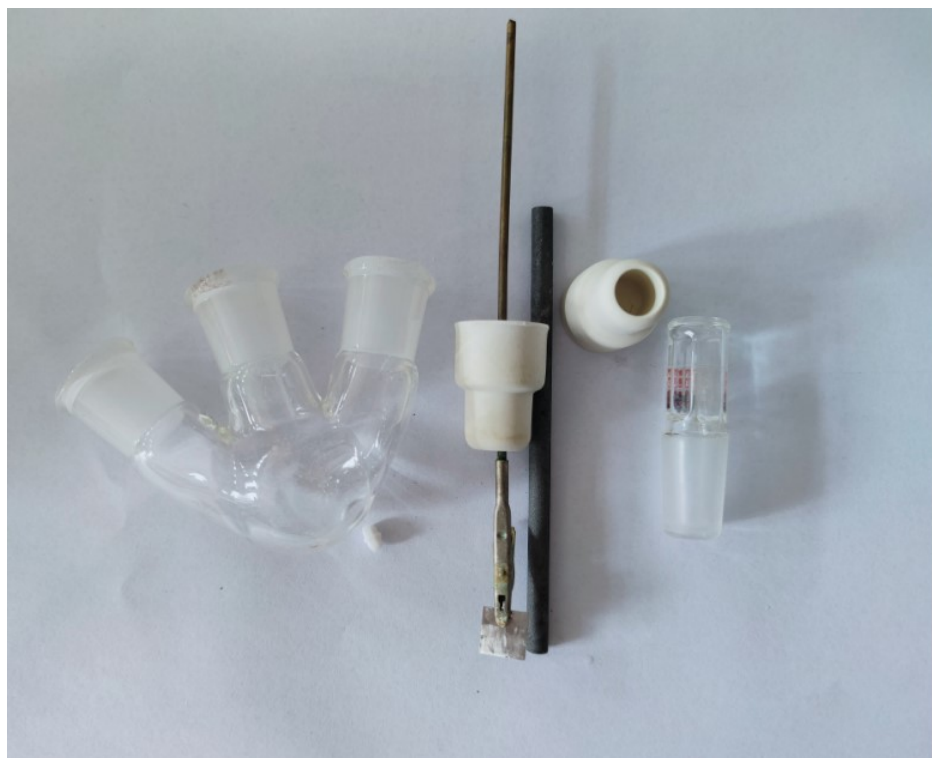

Figure S1. The materials

### B1.3 General Procedure for the Synthesis of 3.

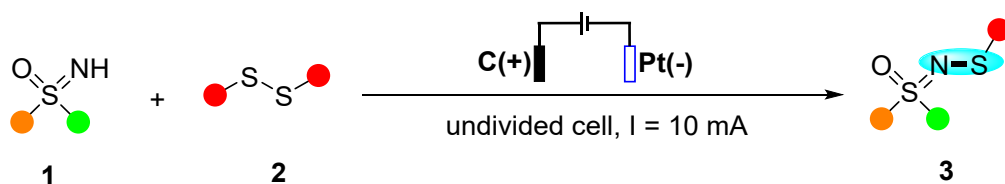

*NH*-sulfoximines **1** (0.1 mmol, 1 equiv.), disulfides **2** (0.1 mmol, 1 equiv.), and TBAI (0.2 mmol, 2 equiv.) were placed in a 10 mL round bottom flask with three necks. The flask was equipped with a carbon rod ( $\phi = 0.6$  cm, working height = 1.5 cm) as the anode, a platinum plate (1.0 cm  $\times$  1.0 cm  $\times$  0.01 cm) as the cathode.  $\text{CH}_3\text{CN}$  (3.0 mL) and *t*-BuOH (0.1 mmol, 1 equiv.) were added. The electrolysis was carried out under air atmosphere at rt using a constant current of 10 mA and stopped until complete consumption of *NH*-sulfoximines (monitored by TLC, about 1-3 h) (3.7-11.2 F/mol) (current efficiency (3.8-24.1%)). The mixture was cooled and diluted with brine, and the product was extracted with ethyl acetate ( $3 \times 10$  mL). The organic layer was dried with anhydrous  $\text{Na}_2\text{SO}_4$  and concentrated under reduced pressure. The residue was chromatographed through silica gel eluting with petroleum ether/ethyl acetate to give the desired products **3** (Figure S2).

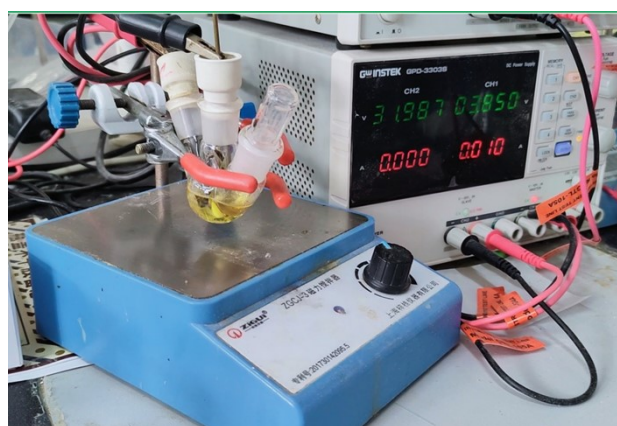

Figure S2. General procedure for the synthesis of 3

## B1.4 General Procedure for the Synthesis of *N*-(2-Thiophenyl)benzamide Derivatives.

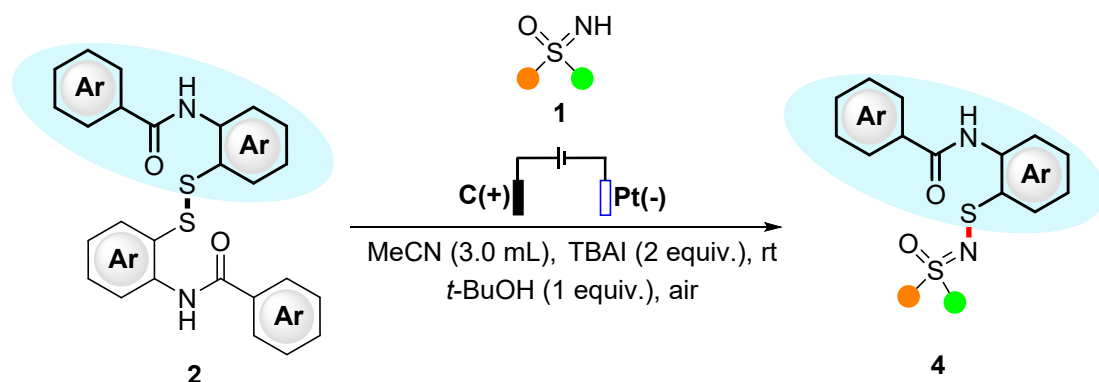

*NH*-sulfoximines **1** (0.1 mmol, 1 equiv.), disulfides **2** (0.1 mmol, 1 equiv.), and TBAI (0.2 mmol, 2 equiv.) were placed in a 10 mL round bottom flask with three necks. The flask was equipped with a carbon rod ( $\varphi = 0.6$  cm, working height = 1.5 cm) as the anode, a platinum plate (1.0 cm  $\times$  1.0 cm  $\times$  0.01 cm) as the cathode. CH<sub>3</sub>CN (3.0 mL) and *t*-BuOH (0.1 mmol, 1 equiv.) were added. The electrolysis was carried out under air atmosphere at rt using a constant current of 10 mA and stopped until complete consumption of *NH*-sulfoximines (monitored by TLC, about 1.5-2 h) (5.6-7.5 F/mol) (current efficiency (6.7-14.3%)). The mixture was cooled and diluted with brine, and the product was extracted with ethyl acetate (3  $\times$  10 mL). The organic layer was dried with anhydrous Na<sub>2</sub>SO<sub>4</sub> and concentrated under reduced pressure. The residue was chromatographed through silica gel eluting with petroleum ether/ethyl acetate to give the desired products *N*-(2-Thiophenyl)benzamide derivatives **4**.

## B2. Hydrogen Capture Experiment

To further verify whether the hydrogen generated, we use hydrogen detector. Sulfonimidoyldibenzene **1a** (0.1 mmol, 1 equiv.), 1,2-diphenyldisulfane **2a** (0.1 mmol, 1 equiv.), and TBAI (0.2 mmol) were placed in a 10 mL round bottom flask with three necks. The flask was equipped with a carbon rod ( $\varphi=0.6$  cm, working height = 1.5 cm) as the anode, a platinum plate (1.0 cm  $\times$  1.0 cm  $\times$  0.01 cm) as cathode. CH<sub>3</sub>CN (3.0 mL) and *t*-BuOH (0.1 mmol, 1 equiv.) were added. The electrolysis was carried out under air atmosphere at rt using a constant current of 10 mA. After 10 minutes of reaction, install the ES20B-H<sub>2</sub> detector (Figure S3).

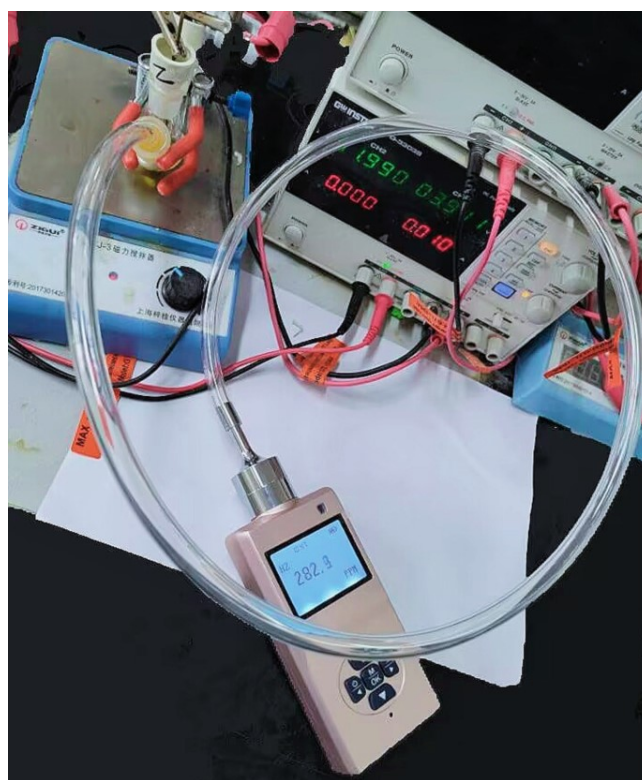

Figure S3. Hydrogen capture experiment



### C. Optimization of the Reaction Conditions

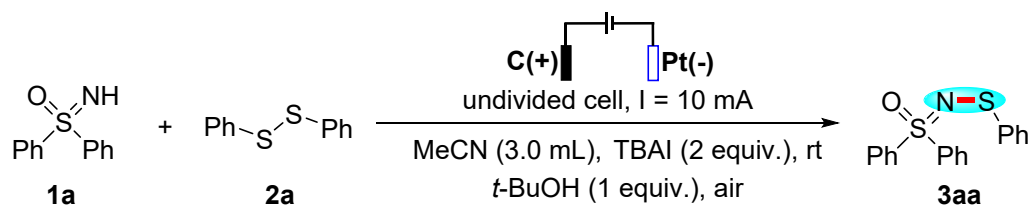

**Table S1. Optimization of the Reaction Conditions<sup>a</sup>**

| Entry           | Variation from the above conditions                        | Yield (%) <sup>b</sup> |
|-----------------|------------------------------------------------------------|------------------------|
| <b>1</b>        | <b>None</b>                                                | <b>80</b>              |
| 2               | MeOH as solvent                                            | 45                     |
| 3               | DCM as solvent                                             | 20                     |
| 4               | DMSO as solvent                                            | 23                     |
| 5               | DMF as solvent                                             | 14                     |
| 6               | HFIP as solvent                                            | 30                     |
| 7               | 7 mA                                                       | 70                     |
| 8               | 13 mA                                                      | 74                     |
| 9               | LiClO <sub>4</sub> instead of TBAI                         | trace                  |
| 10              | <i>n</i> -Bu <sub>4</sub> NBF <sub>4</sub> instead of TBAI | trace                  |
| 11              | <i>n</i> -Bu <sub>4</sub> NBr instead of TBAI              | 52                     |
| 12              | NH <sub>4</sub> I instead of TBAI                          | 61                     |
| 13              | Pt as the anode                                            | 62                     |
| 14              | Ni as the cathode                                          | 65                     |
| 15              | Without <i>t</i> -BuOH                                     | 55                     |
| 16              | Under N <sub>2</sub>                                       | 80                     |
| 17              | 0.5 eq./1.0 eq./3.0 eq. TBAI                               | 42/60/68               |
| 18 <sup>c</sup> | <i>S</i> -phenylester instead of <b>2a</b>                 | 60                     |
| 19 <sup>d</sup> | 4-Methoxybenzenethiol instead of <b>2a</b>                 | 38                     |
| 20 <sup>e</sup> | 4-Chlorothiophenol instead of <b>2a</b>                    | 40                     |
| 21              | No electricity                                             | n.r.                   |

<sup>a</sup>Reaction conditions: C rod (∅ 0.6 cm) anode, Pt cathode (1.0 cm × 1.0 cm × 0.01 cm), **1a** (0.1 mmol), **2a** (0.1 mmol), TBAI (2 equiv.), *t*-BuOH (1 equiv.), CH<sub>3</sub>CN (3.0 mL), 10 mA, rt, 1.5 h (5.6 F/mol) and under air; n.r. = not reaction. <sup>b</sup>Isolated yield.

<sup>c</sup>Reaction time: 0.5 h (1.9 F/mol). <sup>d</sup>Product **3ac**. <sup>e</sup>Product **3ad**.

**Table S2. Optimization of 3aa with different solvent**

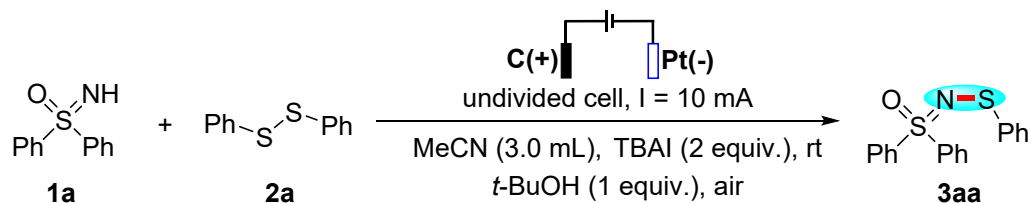

| Entry <sup>a</sup> | Solvent         | Yield (%) <sup>b</sup> |
|--------------------|-----------------|------------------------|
| <b>1</b>           | <b>None</b>     | <b>80</b>              |
| 2                  | MeOH as solvent | 45                     |
| 3                  | DCM as solvent  | 20                     |
| 4                  | DMSO as solvent | 23                     |
| 5                  | DMF as solvent  | 14                     |
| 6                  | HFIP as solvent | 30                     |
| 7                  | DCE as solvent  | 26                     |
| 8                  | EtOH as solvent | 36                     |

<sup>a</sup>Reaction conditions: C rod ( $\varnothing$  0.6 cm) anode, Pt cathode (1.0 cm  $\times$  1.0 cm  $\times$  0.01 cm), **1a** (0.1 mmol), **2a** (0.1 mmol), TBAI (2 equiv.), *t*-BuOH (1 equiv.), solvent (3.0 mL), 10 mA, rt, 1.5 h (5.6 F/mol) and under air. <sup>b</sup>Isolated yield.

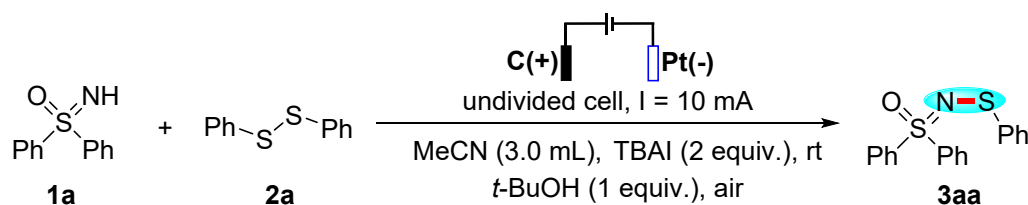

**Table S3. Optimization of 3aa with different electrolyte**

| Entry <sup>a</sup> | Electrolyte                                                | Yield (%) <sup>b</sup> |
|--------------------|------------------------------------------------------------|------------------------|
| <b>1</b>           | <b>None</b>                                                | <b>80</b>              |
| 2                  | LiClO <sub>4</sub> instead of TBAI                         | trace                  |
| 3                  | <i>n</i> -Bu <sub>4</sub> NBF <sub>4</sub> instead of TBAI | trace                  |
| 4                  | <i>n</i> -Bu <sub>4</sub> NBr instead of TBAI              | 52                     |
| 5                  | NH <sub>4</sub> I instead of TBAI                          | 61                     |
| 6                  | KI instead of TBAI                                         | 59                     |
| 7                  | NaI instead of TBAI                                        | 56                     |
| 8                  | <i>n</i> -Bu <sub>4</sub> NPF <sub>6</sub> instead of TBAI | trace                  |

<sup>a</sup>Reaction conditions: C rod ( $\varnothing$  0.6 cm) anode, Pt cathode (1.0 cm  $\times$  1.0 cm  $\times$  0.01 cm), **1a** (0.1 mmol), **2a** (0.1 mmol), electrolyte (2 equiv.), *t*-BuOH (1 equiv.), CH<sub>3</sub>CN (3.0 mL), 10 mA, rt, 1.5 h (5.6 F/mol) and under air. <sup>b</sup>Isolated yield.

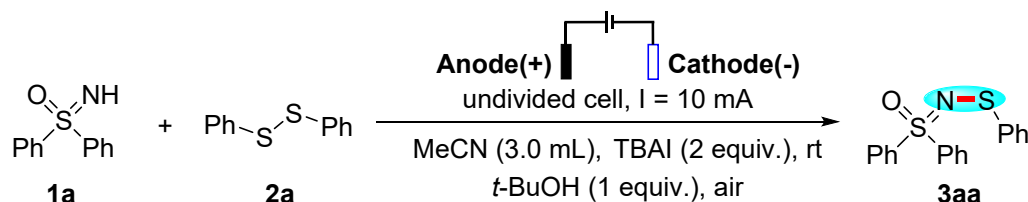

**Table S4. Optimization of 3aa with different electrode**

| Entry <sup>a</sup> | Anode/Cathode | Yield (%) <sup>b</sup> |
|--------------------|---------------|------------------------|
| <b>1</b>           | <b>C/Pt</b>   | <b>80</b>              |

|   |       |    |
|---|-------|----|
| 2 | Pt/Pt | 62 |
| 3 | C/Ni  | 65 |
| 4 | C/SS  | 63 |
| 5 | C/GC  | 45 |
| 6 | C/C   | 64 |
| 7 | GC/Pt | 42 |
| 8 | Pt/C  | 55 |

<sup>a</sup>Reaction conditions: **1a** (0.1 mmol), **2a** (0.1 mmol), TBAI (2 equiv.), *t*-BuOH (1 equiv.), CH<sub>3</sub>CN (3.0 mL), 10 mA, rt, 1.5 h (5.6 F/mol) and under air. <sup>b</sup>Isolated yield.

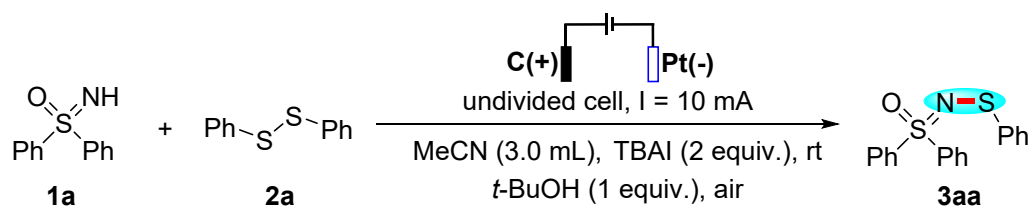

**Table S5. Optimization of 3aa with different amounts of TBAI**

| Entry <sup>a</sup> | TBAI        | Yield (%) <sup>b</sup> |
|--------------------|-------------|------------------------|
| <b>1</b>           | <b>None</b> | <b>80</b>              |
| 2                  | 10 mol %    | 15                     |
| 3                  | 20 mol %    | 20                     |
| 4                  | 0.5 eq.     | 42                     |
| 5                  | 1.0 eq.     | 60                     |
| 6                  | 3.0 eq.     | 68                     |

<sup>a</sup>Reaction conditions: C rod (∅ 0.6 cm) anode, Pt cathode (1.0 cm × 1.0 cm × 0.01 cm), **1a** (0.1 mmol), **2a** (0.1 mmol), TBAI, *t*-BuOH (1 equiv.), CH<sub>3</sub>CN (3.0 mL), 10 mA, rt, 1.5 h (5.6 F/mol) and under air. <sup>b</sup>Isolated yield.

**Table S6. Optimization of 3aa with different additive**

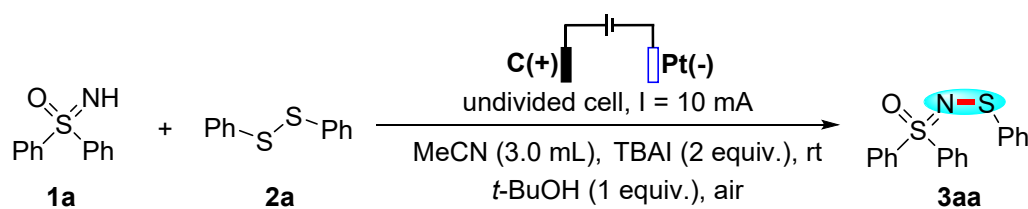

| Entry <sup>a</sup> | Additive                                                                  | Yield (%) <sup>b</sup> |
|--------------------|---------------------------------------------------------------------------|------------------------|
| <b>1</b>           | <b>None</b>                                                               | <b>80</b>              |
| 2                  | (C <sub>2</sub> H <sub>5</sub> ) <sub>3</sub> N instead of <i>t</i> -BuOH | 56                     |
| 3                  | CH <sub>3</sub> COONa instead of <i>t</i> -BuOH                           | 58                     |
| 4                  | K <sub>2</sub> CO <sub>3</sub> instead of <i>t</i> -BuOH                  | 60                     |
| 5                  | <i>t</i> -BuOK instead of <i>t</i> -BuOH                                  | 64                     |
| 6                  | 1.3 equiv. <i>t</i> -BuOH                                                 | 80                     |

<sup>a</sup>Reaction conditions: C rod ( $\emptyset$  0.6 cm) anode, Pt cathode (1.0 cm  $\times$  1.0 cm  $\times$  0.01 cm), **1a** (0.1 mmol), **2a** (0.1 mmol), TBAI (2 equiv.), *t*-BuOH (1 equiv.), CH<sub>3</sub>CN (3.0 mL), 10 mA, rt, 1.5 h (5.6 F/mol) and under air. <sup>b</sup>Isolated yield.

## D. Gram-scale Experiment

*NH*-Sulfoximines **1** (5.0 mmol, 1 equiv.), disulfides **2** (5.0 mmol, 1 equiv.), and TBAI (1.34 mmol, 0.268 equiv.) were placed in a 100 mL round bottom flask with three necks. The flask was equipped with a carbon rod ( $\phi=0.6$  cm, working height = 1.5 cm) as the anode, a platinum plate (1.0 cm  $\times$  1.0 cm  $\times$  0.01 cm) as cathode. CH<sub>3</sub>CN (20.0 mL) and *t*-BuOH (5.0 mmol, 1 equiv.) were added. The electrolysis was carried out under air atmosphere at rt using a constant current of 20 mA and stopped until complete consumption of *NH*-sulfoximines (monitored by TLC, about 47-52 h) (7.0-7.8 F/mol) (current efficiency (9.0-11.3%)). The mixture was cooled and diluted with brine, and the product was extracted with ethyl acetate (3  $\times$  30 mL). The organic layer was dried with anhydrous Na<sub>2</sub>SO<sub>4</sub> and concentrated under reduced pressure. The residue was chromatographed through silica gel eluting with petroleum ether/ethyl acetate to give the desired products **3**.

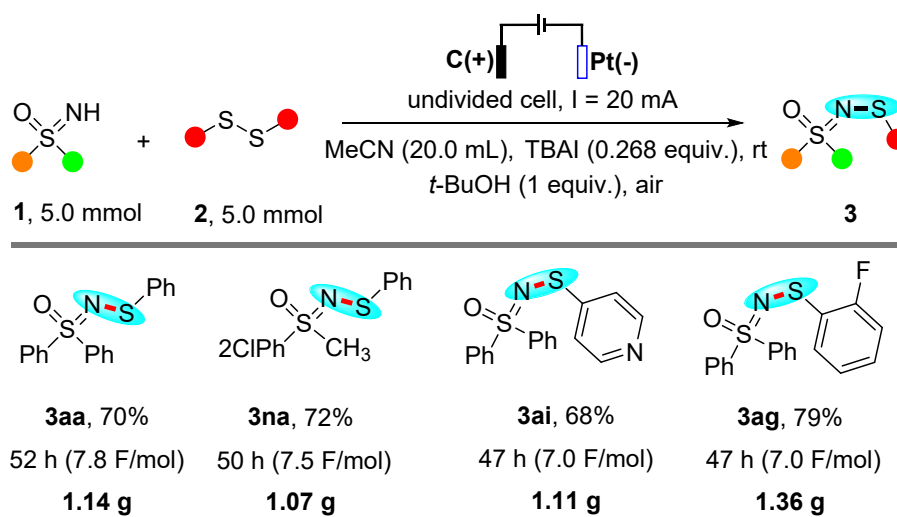

Scheme S1. Gram-Scale Experiments

## E. Biological Applications

Standard 3-(4,5-dimethylthiazole)-2,5-diphenyltetraazolium bromide (MTT) assay procedures were used. Cells were placed in 96-well microassay culture plates ( $8 \times 10^3$  cells per well) and grown overnight at 37 °C in a 5% CO<sub>2</sub> incubator. The tested compounds were then added to the wells to achieve final concentrations ranging from  $10^{-6}$  to  $10^{-4}$  M. Control wells were prepared by the addition of a culture medium (100 µL). The plates were incubated at 37 °C in a 5% CO<sub>2</sub> incubator for 48 h. Upon completion of the incubation, stock MTT dye solution (20 µL, 5 mg·mL<sup>-1</sup>) was added to each well. After 4 h, DMSO (100 µL) was added to solubilize the MTT formazan. The optical density of each well was then measured with a microplate spectrophotometer at a wavelength of 490 nm. The IC<sub>50</sub> values were calculated by plotting the percentage viability versus concentration on a logarithmic graph and reading of the concentration at which 50% of cells remained viable relative to the control. Each experiment was repeated at least three times to obtain the mean values. The results are summarized in Table S7.

**Table S7. Biological Applications<sup>a</sup>**

| <b>Compounds</b> | <b>IC<sub>50</sub> (μM)</b> |               |              |             |
|------------------|-----------------------------|---------------|--------------|-------------|
|                  | <b>A549</b>                 | <b>HepG-2</b> | <b>MCF-7</b> | <b>Hela</b> |
| <b>4a</b>        | 76.4 ± 5.8                  | >100          | 85.3 ± 7.2   | >100        |
| <b>4b</b>        | 92.4 ± 7.1                  | >100          | 76.7 ± 7.4   | 79.9 ± 7.5  |
| <b>4c</b>        | 32.8 ± 2.7                  | 69.2 ± 6.7    | >100         | 43.6 ± 3.7  |
| <b>4d</b>        | >100                        | >100          | 83.5 ± 5.9   | >100        |
| <b>4e</b>        | 97.5 ± 6.3                  | >100          | >100         | >100        |
| <b>4f</b>        | >100                        | >100          | >100         | >100        |
| <b>4g</b>        | 29.7 ± 2.8                  | 35.3 ± 2.5    | 41.6 ± 3.6   | 28.6 ± 2.7  |
| <b>4h</b>        | 46.3 ± 4.3                  | 51.4 ± 4.6    | 26.6 ± 2.3   | 35.4 ± 3.4  |
| <b>5-Fu</b>      | 34.6 ± 3.1                  | 40.7 ± 4.6    | 30.5 ± 3.9   | 32.9 ± 3.4  |

<sup>a</sup>IC<sub>50</sub> (μM) values of compounds against the selected cancer cell lines; **5-Fu** = 5-fluorouracil.

## F. Control Experiments

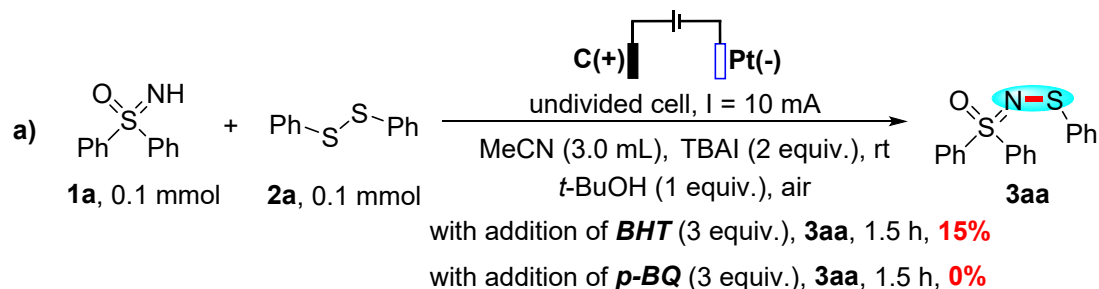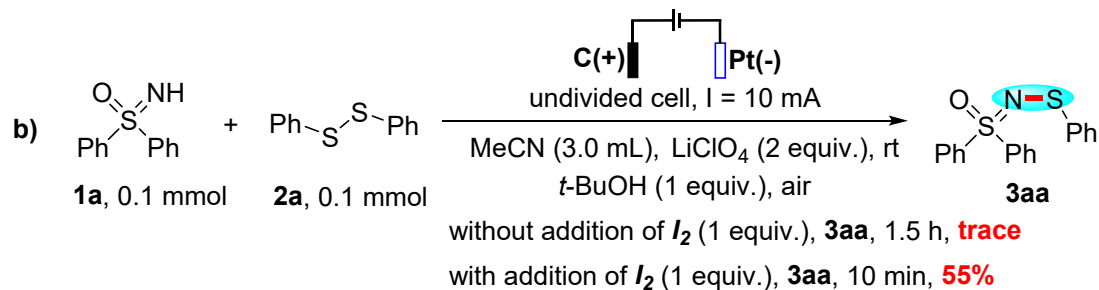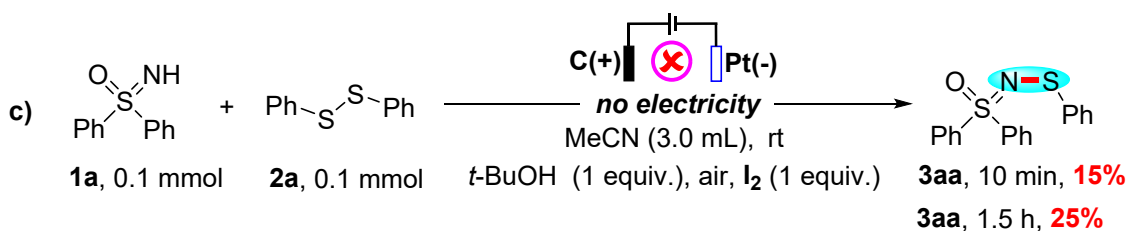

Change of the reaction conditions<sup>a</sup>

| Entry | Additive                                                                  | Catalyst ( $I_2$ ) | Yield (%) <sup>b</sup> |
|-------|---------------------------------------------------------------------------|--------------------|------------------------|
| 1     | <i>t</i> -BuOH                                                            | 1 equiv.           | 25                     |
| 2     | (C <sub>2</sub> H <sub>5</sub> ) <sub>3</sub> N instead of <i>t</i> -BuOH | 1 equiv.           | 32                     |
| 3     | Na <sub>2</sub> CO <sub>3</sub> instead of <i>t</i> -BuOH                 | 1 equiv.           | 34                     |
| 4     | CH <sub>3</sub> COONa instead of <i>t</i> -BuOH                           | 1 equiv.           | 36                     |
| 5     | K <sub>2</sub> CO <sub>3</sub> instead of <i>t</i> -BuOH                  | 1 equiv.           | 51                     |
| 6     | <i>t</i> -BuOK instead of <i>t</i> -BuOH                                  | 1 equiv.           | 53                     |

<sup>a</sup>Reaction conditions: **1a** (0.1 mmol), **2a** (0.1 mmol),  $I_2$  (1 equiv.), *t*-BuOH (1 equiv.), CH<sub>3</sub>CN (3.0 mL), rt, 1.5 h, under air and no electricity. <sup>b</sup>Isolated yield.



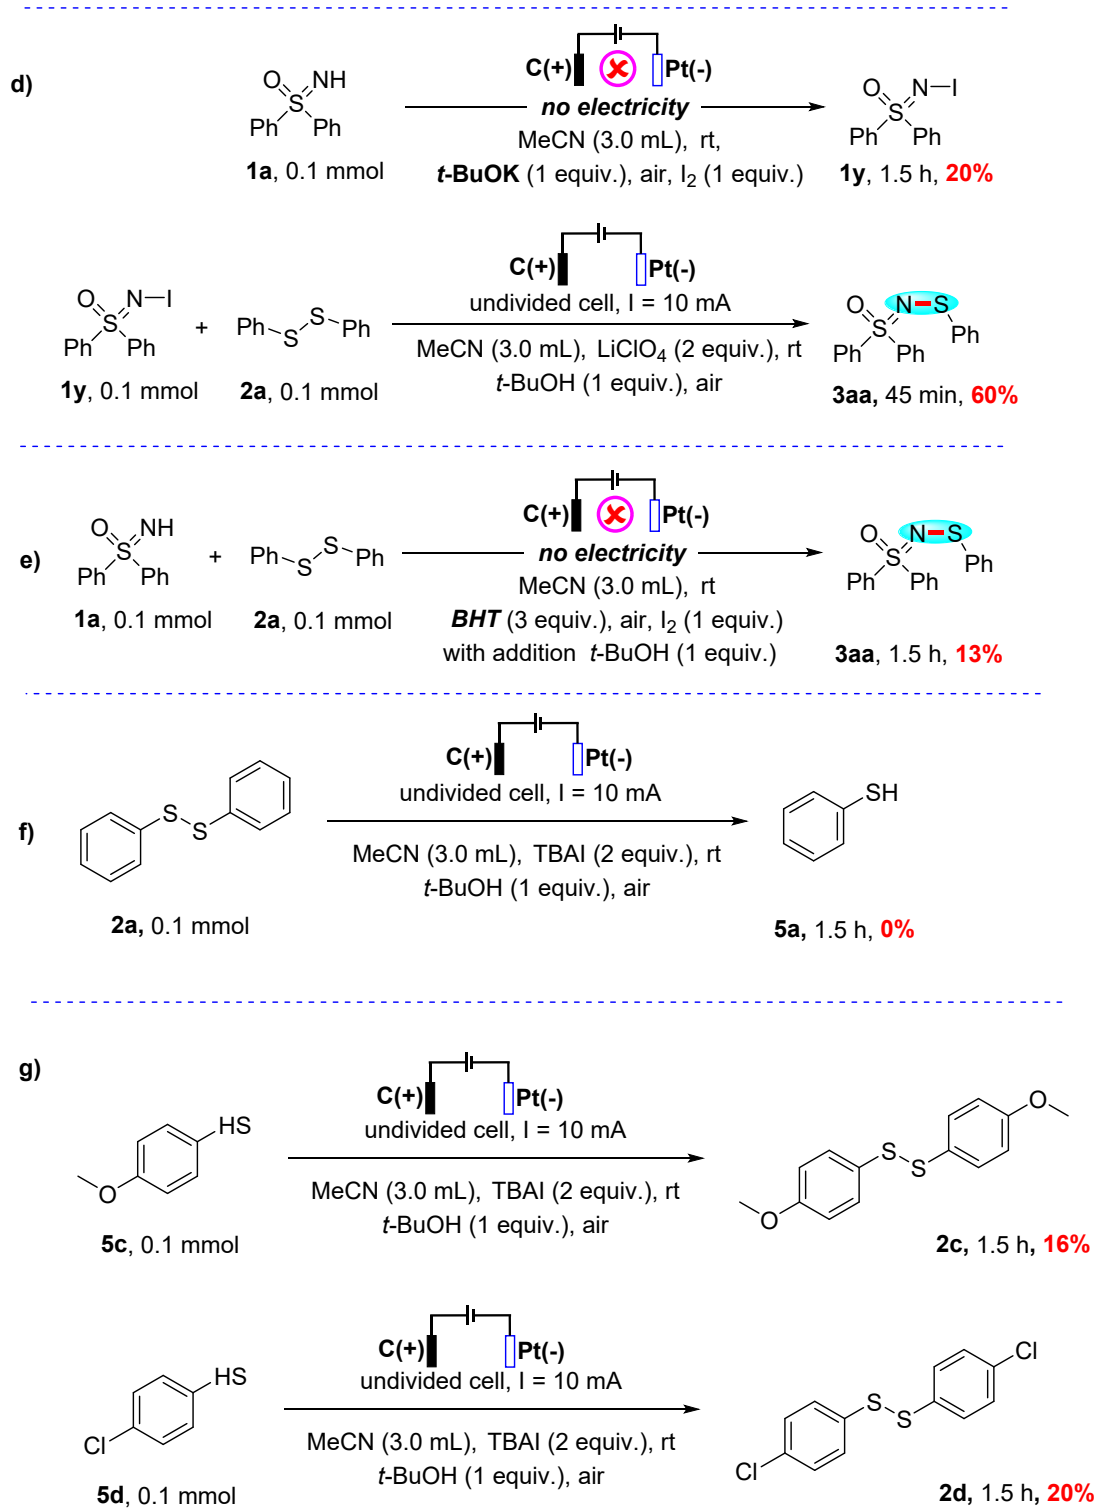

### Scheme S2. Control Experiments

## G. Cyclic Voltammetry Experiments

The cyclic voltammetry experiments were carried out with a computer-controlled electrochemical analyzer for electrochemical measurements. The experiment was performed in a three-electrode cell with CH<sub>3</sub>CN (3.0 mL) as the solvent, *t*-BuOH (10 mmol/L) as the additive, 0.1 M LiClO<sub>4</sub> as the supporting electrolyte, the tested compound (10 mmol/L). The working electrode is a diameter glassy carbon working electrode (GCE) ( $\varphi=0.3\text{ }\varnothing\text{ }4.5\text{ cm}$ ) that was polished with 0.3  $\mu\text{m}$  aluminum oxide and then washed in distilled water and ethanol before measurements. Pt wire ( $\varphi=0.05\text{ }\varnothing\text{ }3.7\text{ cm}$ ) as the auxiliary electrode, and Ag/AgCl (saturated aqueous KCl,  $\varphi=0.4\text{ }\varnothing\text{ }4.5\text{ cm}$ ) as the reference electrode that was washed with water and ethanol before measurements. The scan rate is 100 mV/s, ranging from 0 V to 2.0 V. CV plotting convention is IUPAC. The starting point was 0 V, and the direction of the initial scan was oxidative. Before the determination of the sample, ferrocene (Fc) (0.25 mmol) and 0.1 M LiClO<sub>4</sub> were weighed and dissolved in CH<sub>3</sub>CN (3.0 mL) to test CV. The samples were tested after the data stabilized. Otherwise, polish the electrode until the data is stable.

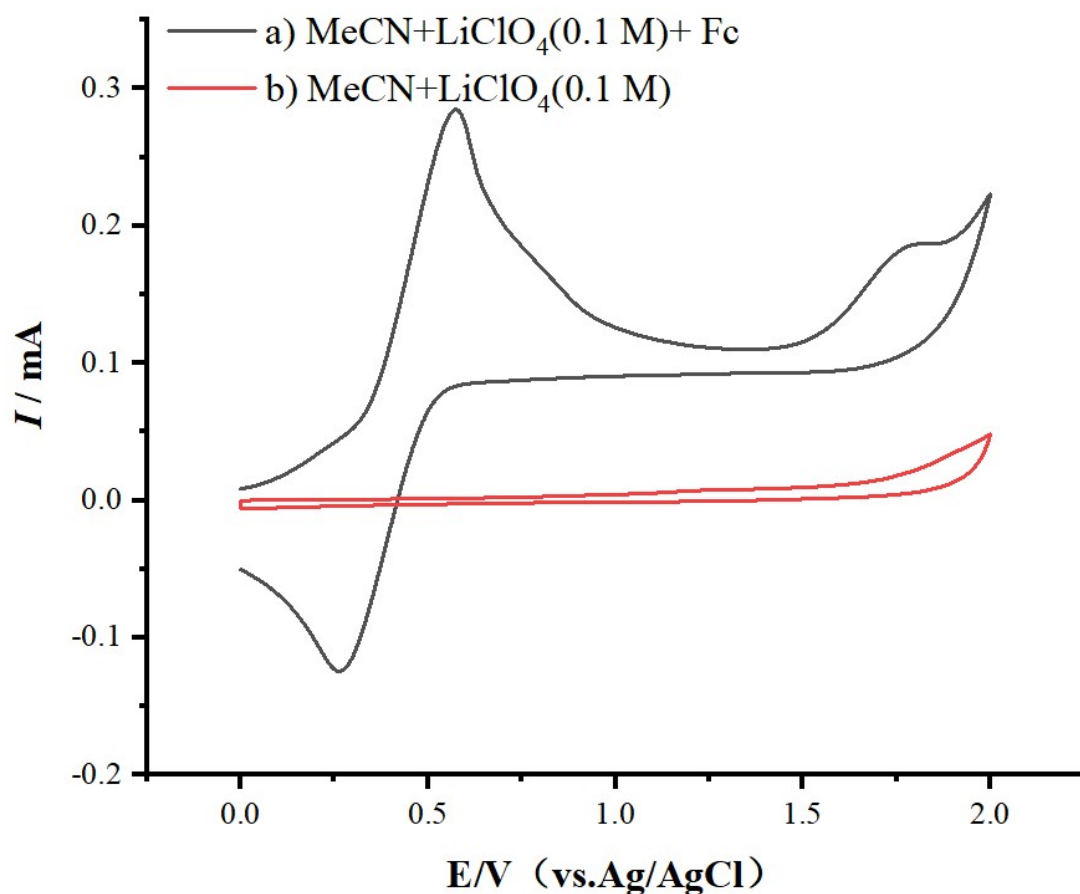

**Figure S4** (a) Cyclic voltammograms of solution in a solvent of CH<sub>3</sub>CN (3.0 mL), 0.1 M LiClO<sub>4</sub> and Fc (0.25 mmol). (b) Cyclic voltammograms of solution in a solvent of CH<sub>3</sub>CN (3.0 mL) and 0.1 M LiClO<sub>4</sub>. In the presence of Fc, the oxidative and reductive peaks were 0.57 V vs Ag/Ag<sup>+</sup> and 0.26 V vs Ag/Ag<sup>+</sup>.

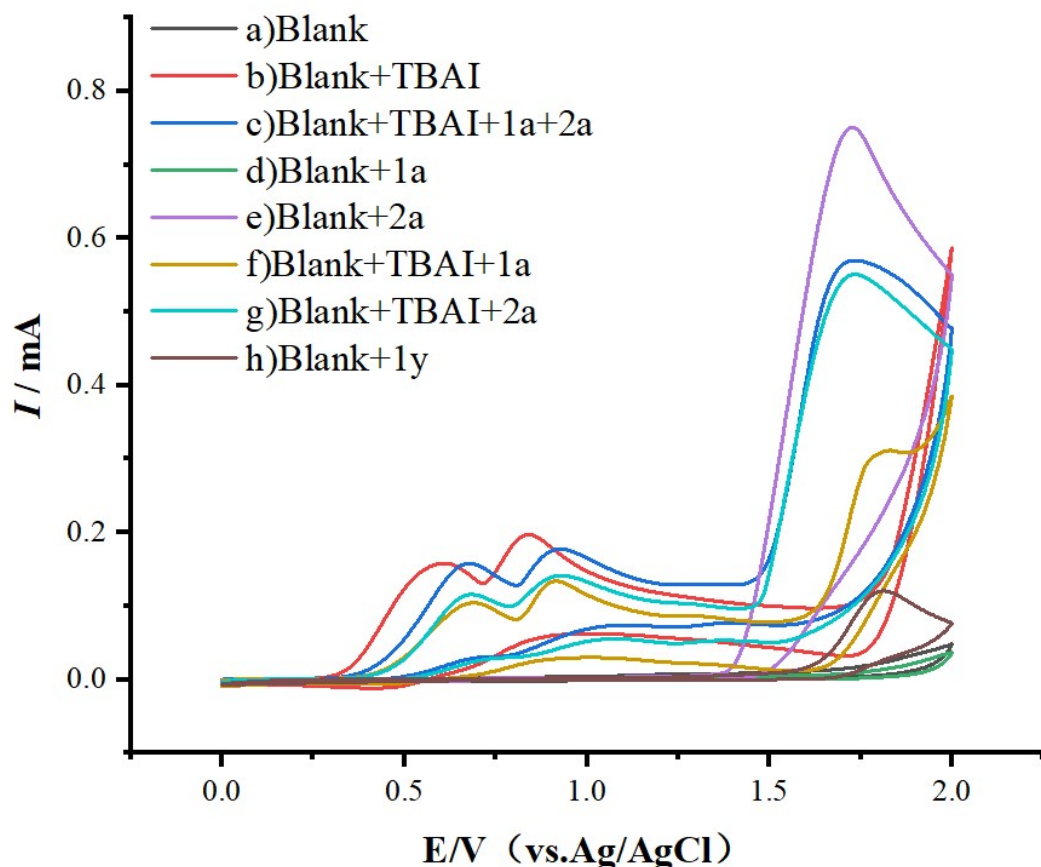

**Figure S5** Cyclic voltammograms of solution in a solvent of  $\text{CH}_3\text{CN}$  (3.0 mL) containing *t*-BuOH (10 mmol/L) and 0.1 M  $\text{LiClO}_4$ . (a) Blank; (b) Blank + TBAI (10 mmol/L)(two oxidative peaks of TBAI were observed at 0.59 V vs  $\text{Ag}/\text{Ag}^+$  and 0.84 V vs  $\text{Ag}/\text{Ag}^+$ ); (c) Blank + **1a** (10 mmol/L) + **2a** (10 mmol/L) + TBAI (10 mmol/L) (In addition to two oxidative peaks in TBAI, an oxidative peak was 1.72 V vs  $\text{Ag}/\text{Ag}^+$ ); (d) Blank + **1a** (10 mmol/L); (e) Blank + **2a** (10 mmol/L) (an oxidative peak of **2a** was 1.72 V vs  $\text{Ag}/\text{Ag}^+$ ); (f) Blank + **1a** (10 mmol/L) + TBAI (10 mmol/L) (In addition to two oxidative peaks in TBAI, an oxidative peak was 1.80 V vs  $\text{Ag}/\text{Ag}^+$ ); (g) Blank + **2a** (10 mmol/L) + TBAI (10 mmol/L) (In addition to two oxidative peaks in TBAI, an oxidative peak was 1.74 V vs  $\text{Ag}/\text{Ag}^+$ ); (h) Blank + **1y** (10 mmol/L) (an oxidative peak of **1y** was 1.80 V vs  $\text{Ag}/\text{Ag}^+$ ).

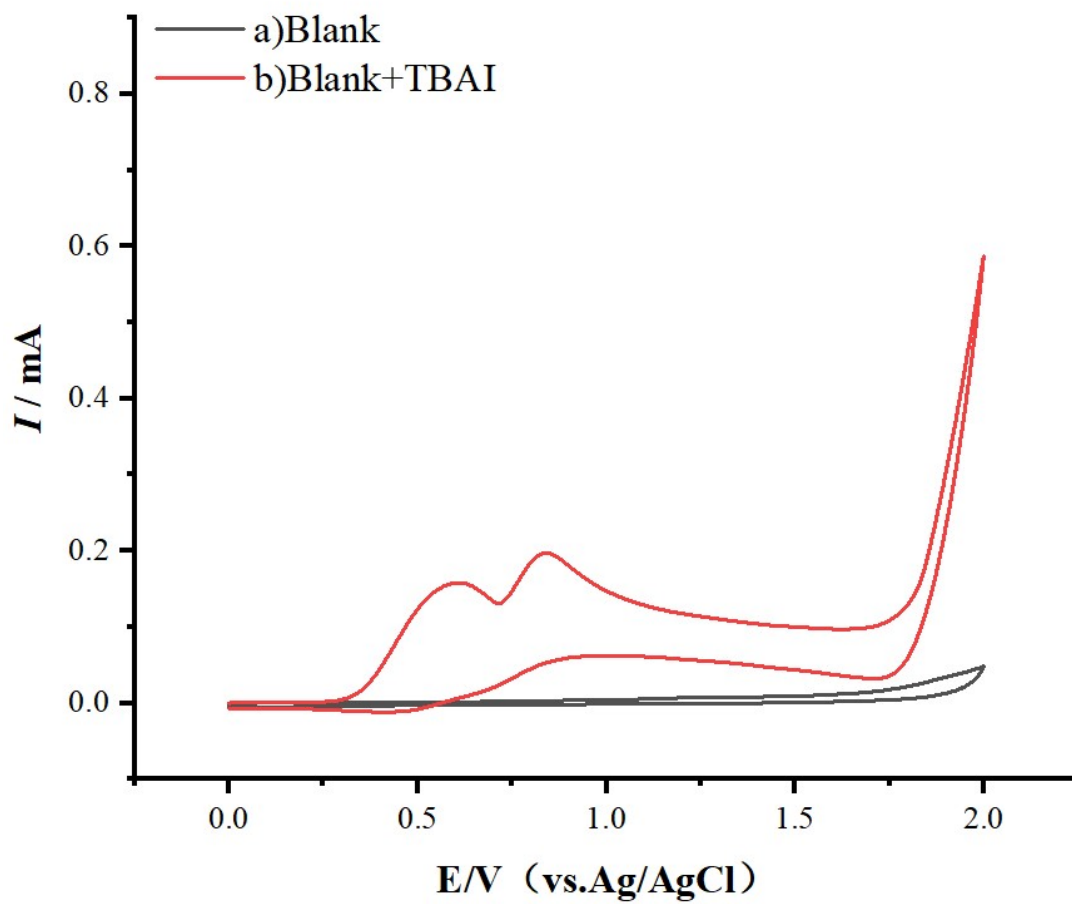

**Figure S6** Cyclic voltammograms of solution in a solvent of CH<sub>3</sub>CN (3.0 mL) containing *t*-BuOH (10 mmol/L) and 0.1 M LiClO<sub>4</sub>. (a) Blank; (b) Blank + TBAI (10 mmol/L),

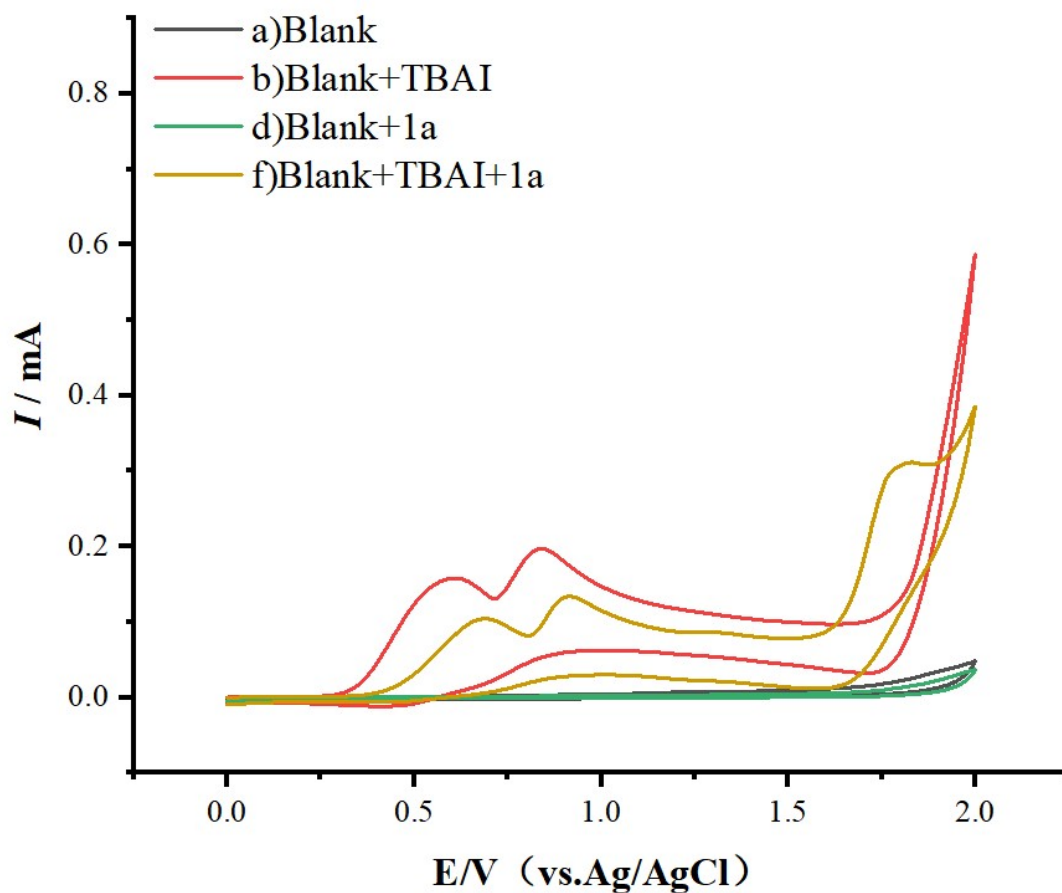

**Figure S7** Cyclic voltammograms of solution in a solvent of  $\text{CH}_3\text{CN}$  (3.0 mL) containing *t*-BuOH (10 mmol/L) and 0.1 M  $\text{LiClO}_4$ . (a) Blank; (b) Blank + TBAI (10 mmol/L); (d) Blank + **1a** (10 mmol/L); (f) Blank + TBAI (10 mmol/L) + **1a** (10 mmol/L).

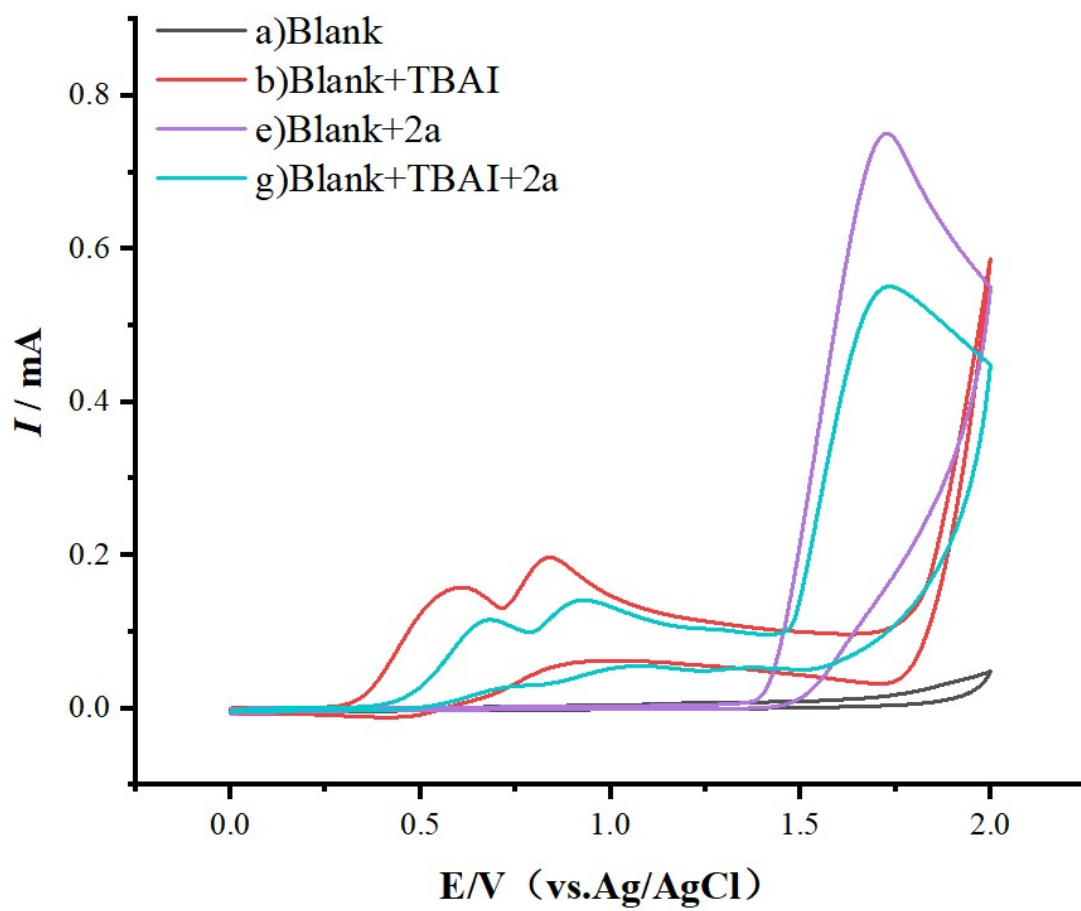

**Figure S8** Cyclic voltammograms of solution in a solvent of  $\text{CH}_3\text{CN}$  (3.0 mL) containing *t*-BuOH (10 mmol/L) and 0.1 M  $\text{LiClO}_4$ . (a) Blank; (b) Blank + TBAI (10 mmol/L); (e) Blank + **2a** (10 mmol/L); (g) Blank + TBAI (10 mmol/L) + **2a** (10 mmol/L).

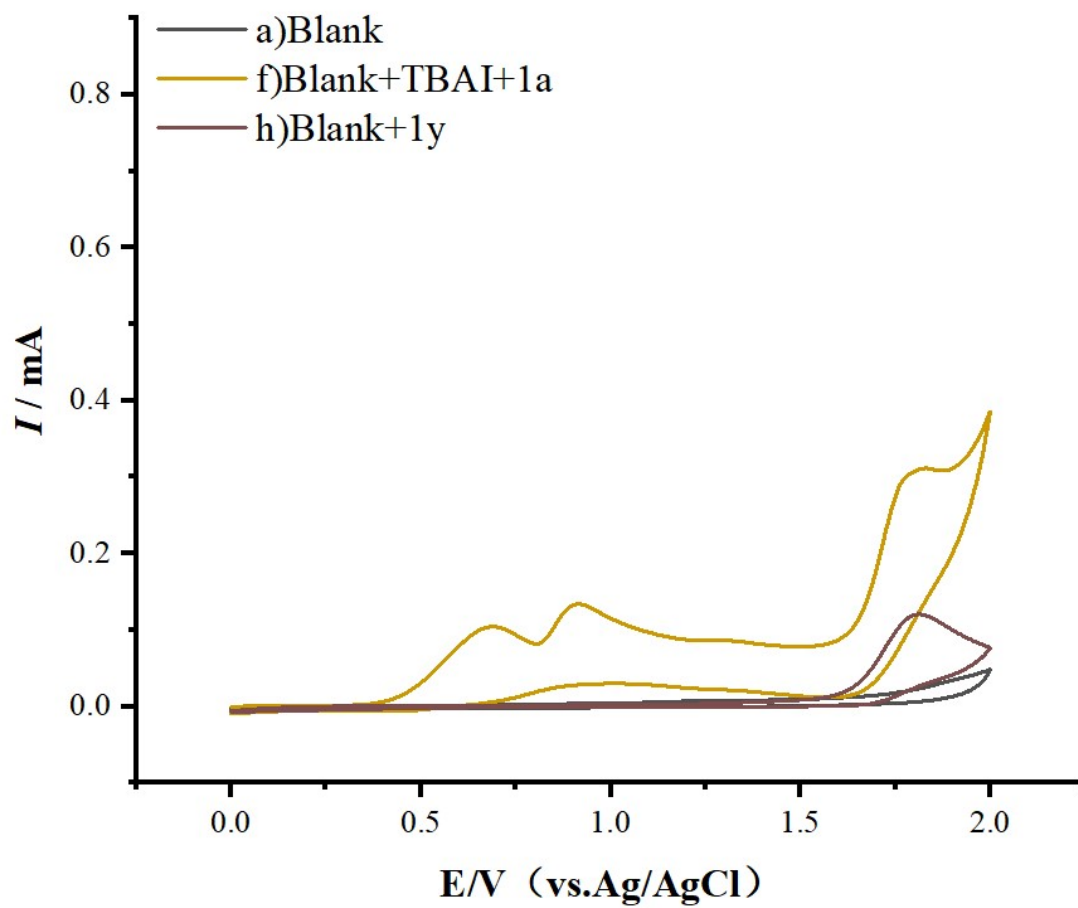

**Figure S9** Cyclic voltammograms of solution in a solvent of  $\text{CH}_3\text{CN}$  (3.0 mL) containing *t*-BuOH (10 mmol/L) and 0.1 M  $\text{LiClO}_4$ . (a) Blank; (f) Blank + **1a** (10 mmol/L) + TBAI (10 mmol/L); (h) Blank + **1y** (10 mmol/L). These experiments indicate that **1y** intermediates may be formed in the reaction.



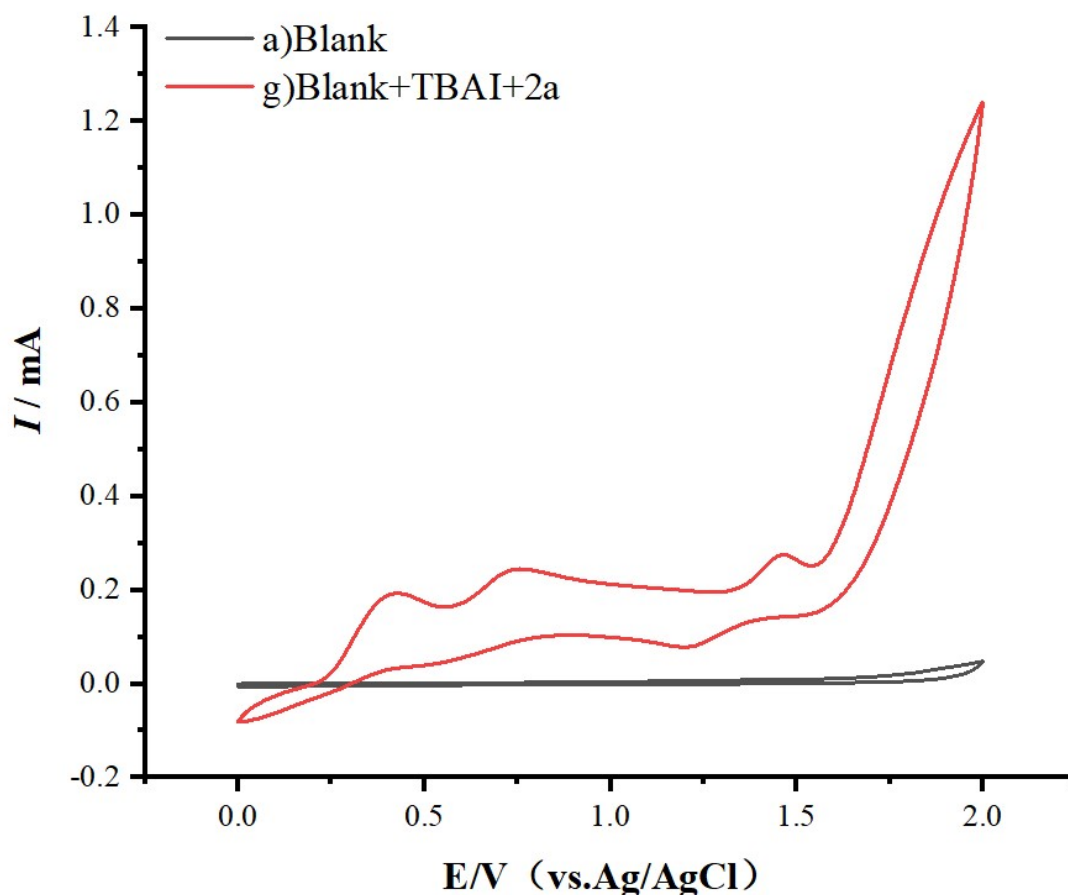

**Figure S10** Cyclic voltammograms of solution in a solvent of  $\text{CH}_3\text{CN}$  (3.0 mL) containing *t*-BuOH (10 mmol/L) and 0.1 M  $\text{LiClO}_4$ . (a) Blank; (g) Blank + TBAI (10 mmol/L) + **2a** (10 mmol/L). The scan rate is 100 mV/s. Pt wire ( $\phi=0.05$   $\times$  3.7 cm) as the working electrode and auxiliary electrode, and Ag/AgCl (saturated aqueous KCl,  $\phi=0.4$   $\times$  4.5 cm) as the reference electrode that were washed with water and ethanol before measurements. CV plotting convention is IUPAC. The starting point was 0 V, and the direction of the initial scan was oxidative. In the presence of TBAI, the oxidative and reductive peaks of **2a** were 1.47 V vs Ag/Ag<sup>+</sup> and 1.20 V vs Ag/Ag<sup>+</sup>, which demonstrated that disulfide **2a** may be circulated on the electrode.

## H. Validation Experiment of I<sub>2</sub>

1. Prepare four 5 mL bottles by adding 2 mL of water and 15 mg of starch to each bottle and number them ①, ②, ③, ④.

2. Sulfonimidoyldibenzene **1a** (0.1 mmol, 1 equiv.), 1,2-diphenyldisulfane **2a** (0.1 mmol, 1 equiv.), and TBAI (0.2 mmol, 2 equiv.) were placed in a 10 mL round bottom flask with three necks. The flask was equipped with a carbon rod ( $\varphi=0.6$  cm, working height = 1.5 cm) as the anode, a platinum plate (1.0 cm  $\times$  1.0 cm  $\times$  0.01 cm) as cathode. CH<sub>3</sub>CN (3.0 mL) and *t*-BuOH (0.1 mmol, 1 equiv.) were added.

3. TBAI (0.2 mmol, 2 equiv.) were placed in a 10 mL round bottom flask with three necks. The flask was equipped with a carbon rod ( $\varphi=0.6$  cm, working height = 1.5 cm) as the anode, a platinum plate (1.0 cm  $\times$  1.0 cm  $\times$  0.01 cm) as cathode. CH<sub>3</sub>CN (3.0 mL) and *t*-BuOH (0.1 mmol, 1 equiv.) were added.

The experimental effect was shown in Scheme S3. First, add 0.05 mmol of iodine to bottle number ① and shake well. The solvent of bottle number ① was observed to turn blue. Then, procedure **2** is stirred for 0.5 h at room temperature and air conditions without electricity. Take 0.5 mL of this reaction system with a straw and add it to bottle number ②. It was observed that the color of solvent with bottle number ② did not change. Procedure **3** is stirred at room temperature and air conditions under 10 mA current electrolysis for 0.5 h. Take 0.5 mL of this reaction system with a straw and add it to bottle number ③. The solvent in bottle number ③ was observed to have a blue liquid level. Procedure **2** is stirred at room temperature and air conditions under 10 mA current electrolysis for 0.5 h. Take 0.5 mL of this

reaction system with a straw and add it to bottle number ④. The solvent in bottle number ④ did not turn blue. These results indicated that under energized conditions, TBAI may be oxidized to intermediate  $I_2$  at the anode, and then undergo subsequent reactions.

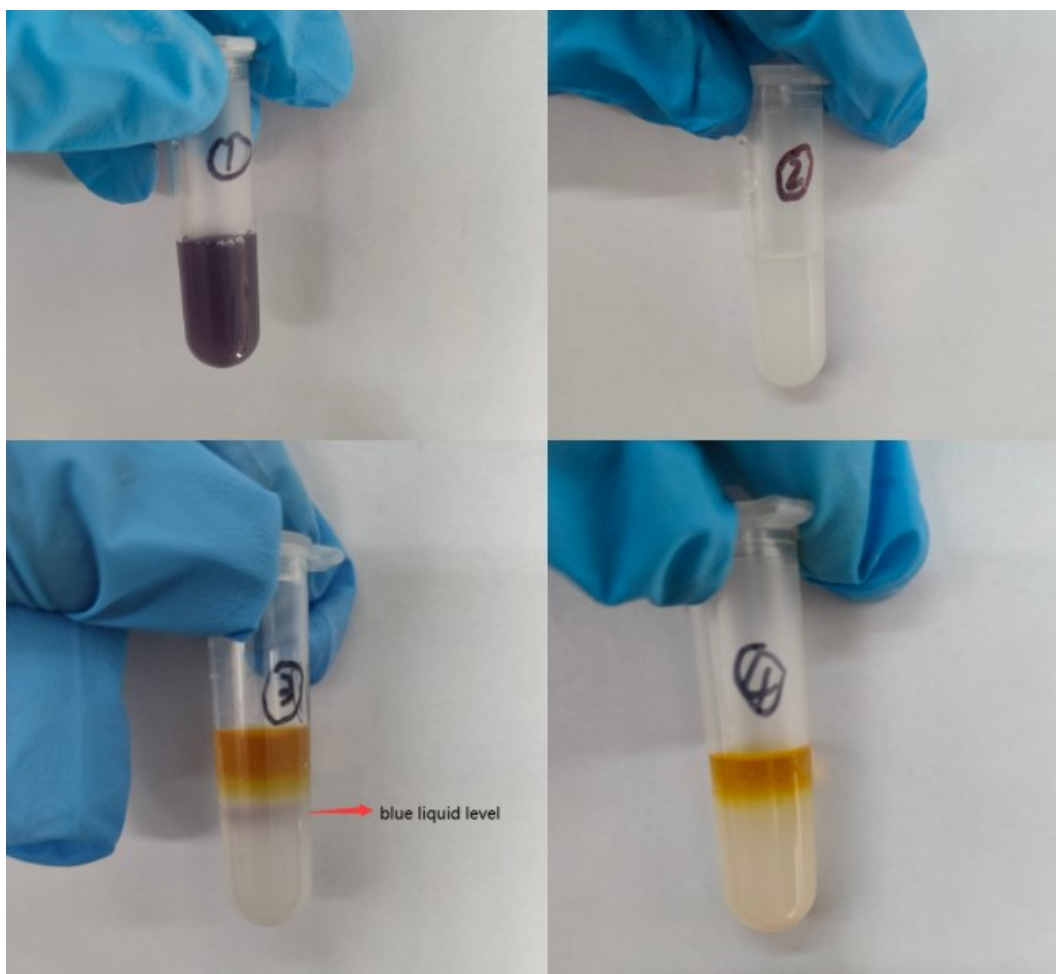

**Scheme S3. Validation Experiment of  $I_2$**

## I. Electrode Stability and Reusability Experiments

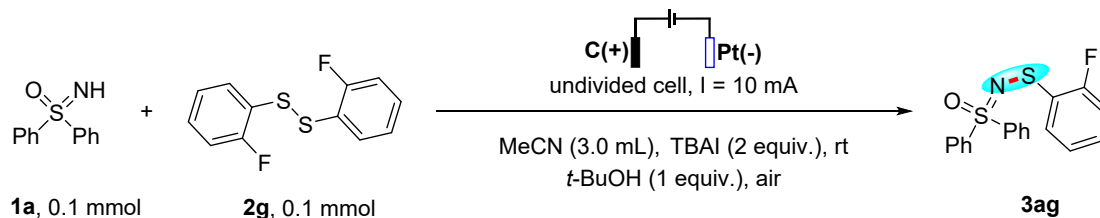

Sulfonimidoyldibenzene **1a** (0.1 mmol, 1 equiv.), 2,2'-difluorodiphenyldisulfide **2g** (0.1 mmol, 1 equiv.), and TBAI (0.2 mmol, 2 equiv.) were placed in a 10 mL round bottom flask with three necks. The flask was equipped with a carbon rod ( $\varphi = 0.6$  cm, working height = 1.5 cm) as the anode, and a platinum plate (1.0 cm  $\times$  1.0 cm  $\times$  0.01 cm) as the cathode. CH<sub>3</sub>CN (3.0 mL) and *t*-BuOH (0.1 mmol, 1 equiv.) were added. The electrolysis was carried out under air atmosphere at rt using a constant current of 10 mA and stopped until complete consumption of sulfonimidoyldibenzene (monitored by TLC, about 1 h) (3.7 F/mol). This reaction was carried out six times in succession and after each reaction the electrode surface was cleaned with methylene chloride and water and wiped clean. After each reaction, the mixture was cooled and diluted with brine, and the product was extracted with ethyl acetate (3  $\times$  10 mL). The organic layer was dried with anhydrous Na<sub>2</sub>SO<sub>4</sub> and concentrated under reduced pressure. The residue was chromatographed through silica gel eluting with petroleum ether/ethyl acetate to give the desired products **3ag** (Figure S11).

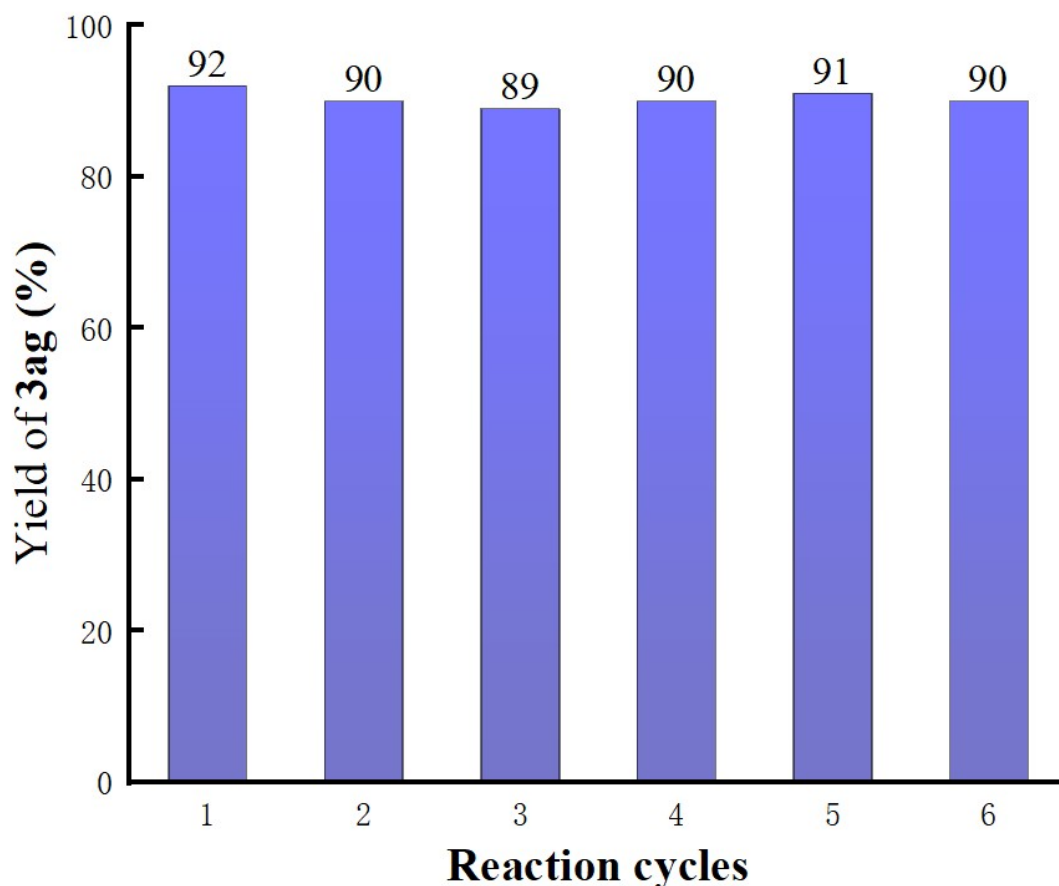

**Figure S11 10 mA Electrode Stability and Reusability Experiments**

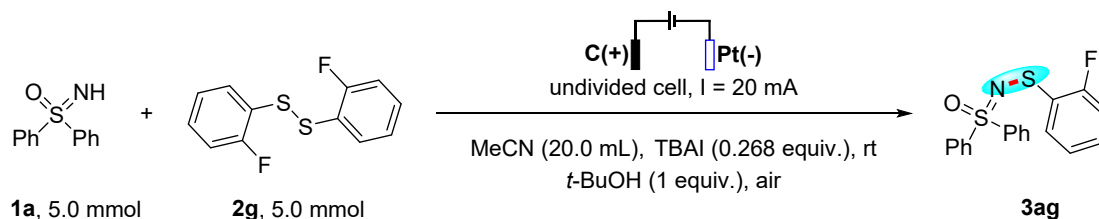

The electrodes used above at 10 mA were tested at 20 mA. Sulfonimidoyldibenzene **1a** (5.0 mmol, 1 equiv.), 2,2'-difluorodiphenyldisulfide **2g** (5.0 mmol, 1 equiv.), and TBAI (1.34 mmol, 0.268 equiv.) were placed in a 100 mL round bottom flask with three necks. The flask was equipped with a carbon rod ( $\varphi = 0.6 \text{ cm}$ , working height = 1.5 cm) as the anode, and a platinum plate (1.0 cm  $\times$  1.0 cm  $\times$  0.01 cm) as a cathode. CH<sub>3</sub>CN (20.0 mL) and *t*-BuOH (5.0 mmol, 1 equiv.) were added. The electrolysis was carried out under air atmosphere at rt using a constant

current of 20 mA and stopped until complete consumption of sulfonimidoyldibenzene (monitored by TLC, about 47 h) (7.0 F/mol). This reaction was carried out three times in succession and after each reaction the electrode surface was cleaned with methylene chloride and water and wiped clean. After each reaction, the mixture was cooled and diluted with brine, and the product was extracted with ethyl acetate ( $3 \times 30$  mL). The organic layer was dried with anhydrous  $\text{Na}_2\text{SO}_4$  and concentrated under reduced pressure. The residue was chromatographed through silica gel eluting with petroleum ether/ethyl acetate to give the desired products **3ag**.

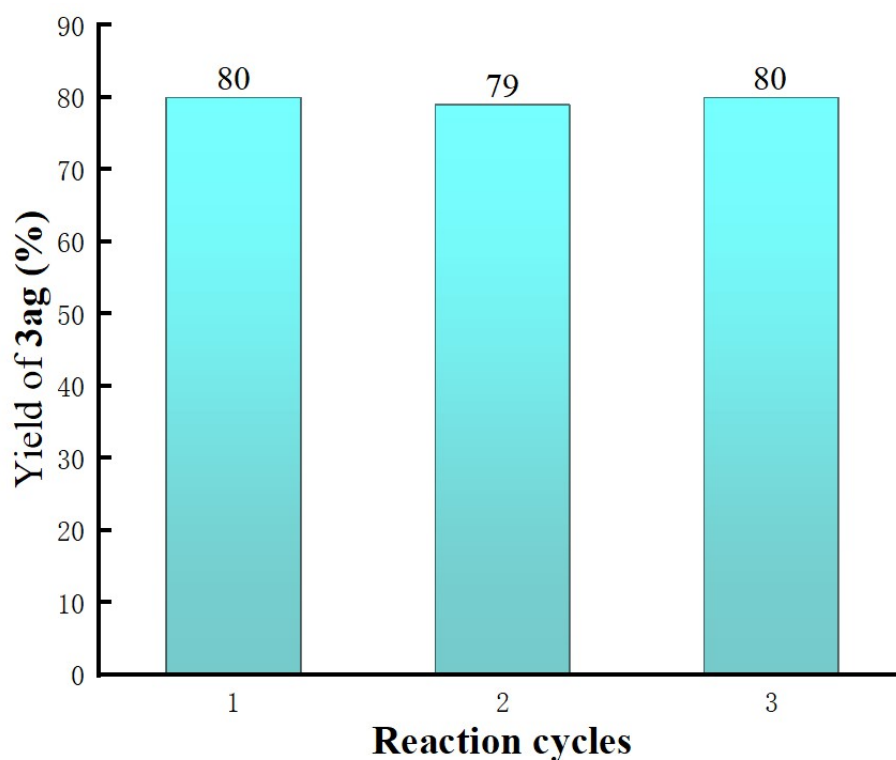

**Figure S12 20 mA Electrode Stability and Reusability Experiment**

## J. Characterizing Data

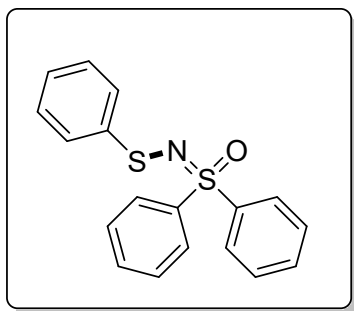

**Diphenyl[(phenylthio)imino]- $\lambda^6$ -sulfanone (3aa)**<sup>[1]</sup>: Following the general procedure and purification by column chromatography using petroleum ether/ethyl acetate (10:1) as eluent afforded the product as a white solid (26.0 mg, 80% yield). Mp: 105-107°C. **<sup>1</sup>H NMR** (500 MHz, CDCl<sub>3</sub>)  $\delta$  8.04 (d,  $J$  = 7.5 Hz, 4H), 7.59 (t,  $J$  = 7.3 Hz, 2H), 7.53 (t,  $J$  = 7.5 Hz, 4H), 7.45 (d,  $J$  = 7.5 Hz, 2H), 7.28 (t,  $J$  = 7.7 Hz, 2H), 7.10 (t,  $J$  = 7.3 Hz, 1H). **<sup>13</sup>C NMR** (126 MHz, CDCl<sub>3</sub>)  $\delta$  142.06, 139.88, 133.19, 129.31, 128.45, 128.42, 125.00, 123.91.

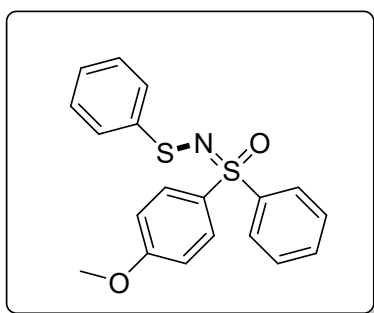

**(4-Methoxyphenyl)(phenyl)((phenylthio)imino)- $\lambda^6$ -sulfanone (3ba)**<sup>[2]</sup>: Following the general procedure and purification by column chromatography using petroleum ether/ethyl acetate (10:1) as eluent afforded the product as a yellow solid (27.7mg, 78% yield). Mp: 92-95 °C. **<sup>1</sup>H NMR** (500 MHz, CDCl<sub>3</sub>)  $\delta$  7.99 (dd,  $J$  = 20.4, 7.9 Hz, 4H), 7.56 (d,  $J$  = 7.3 Hz, 1H), 7.51 (t,  $J$  = 7.4 Hz, 2H), 7.45 (d,  $J$  = 7.8 Hz, 2H), 7.28 (d,  $J$  = 5.9 Hz, 2H), 7.09 (t,  $J$  = 7.3 Hz, 1H), 7.00 (d,  $J$  = 8.9 Hz, 2H), 3.86 (s, 3H). **<sup>13</sup>C NMR**

(126 MHz,  $\text{CDCl}_3$ )  $\delta$  163.47, 142.31, 140.65, 132.85, 130.94, 130.68, 129.21, 128.39, 128.14, 124.88, 123.86, 114.61, 55.64.

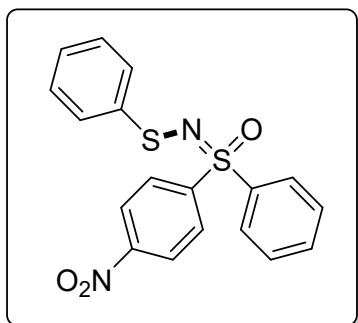

**(4-Nitrophenyl)(phenyl)((phenylthio)imino)- $\lambda^6$ -sulfanone (3ca):** Following the general procedure and purification by column chromatography using petroleum ether/ethyl acetate (10:1) as eluent afforded the product as a yellow oil (25.9 mg, 70% yield).  $^1\text{H NMR}$  (500 MHz,  $\text{CDCl}_3$ )  $\delta$  8.32 (d,  $J = 8.7$  Hz, 2H), 8.17 (d,  $J = 8.7$  Hz, 2H), 8.08 (d,  $J = 7.7$  Hz, 2H), 7.66 (t,  $J = 7.1$  Hz, 1H), 7.58 (t,  $J = 7.6$  Hz, 2H), 7.42 (d,  $J = 7.6$  Hz, 2H), 7.29 (t,  $J = 7.6$  Hz, 2H), 7.13 (t,  $J = 7.3$  Hz, 1H).  $^{13}\text{C NMR}$  (126 MHz,  $\text{CDCl}_3$ )  $\delta$  150.27, 146.18, 141.14, 138.43, 134.02, 129.77, 129.67, 128.73, 128.56, 125.53, 124.31. **HRMS (ESI)**  $m/z$  calcd for  $\text{C}_{18}\text{H}_{14}\text{N}_2\text{O}_3\text{NaS}_2$   $[\text{M}+\text{Na}]^+$  393.0344, found 393.0345.

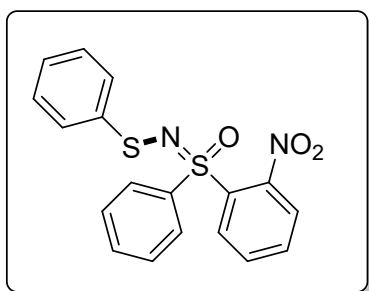

**(2-Nitrophenyl)(phenyl)((phenylthio)imino)- $\lambda^6$ -sulfanone (3da):** Following the general procedure and purification by column chromatography using petroleum



ether/ethyl acetate (10:1) as eluent afforded the product as a yellow oil (25.1 mg, 68% yield).  $^1\text{H NMR}$  (500 MHz,  $\text{CDCl}_3$ )  $\delta$  8.30 – 8.26 (m, 1H), 8.08 (d,  $J = 7.4$  Hz, 2H), 7.73 (dd,  $J = 5.5, 2.8$  Hz, 2H), 7.67 – 7.64 (m, 2H), 7.58 (t,  $J = 7.7$  Hz, 2H), 7.41 (d,  $J = 7.5$  Hz, 2H), 7.30 – 7.26 (m, 2H), 7.12 (t,  $J = 7.3$  Hz, 1H).  $^{13}\text{C NMR}$  (126 MHz,  $\text{CDCl}_3$ )  $\delta$  149.55, 140.97, 138.78, 134.50, 133.77, 132.56, 132.02, 131.90, 129.14, 128.64, 128.52, 125.50, 124.50. **HRMS (ESI)**  $m/z$  calcd for  $\text{C}_{18}\text{H}_{15}\text{N}_2\text{O}_3\text{S}_2$   $[\text{M}+\text{H}]^+$  371.0524, found 371.0527.

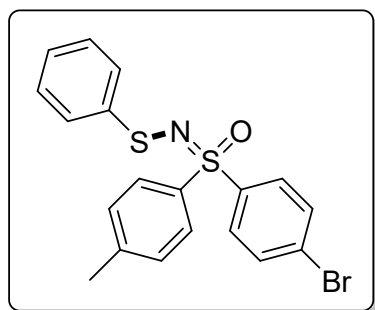

**(4-Bromophenyl)((phenylthio)imino)(p-tolyl)- $\lambda^6$ -sulfanone (3ea)**<sup>[1]</sup>: Following the general procedure and purification by column chromatography using petroleum ether/ethyl acetate (10:1) as eluent afforded the product as a yellow solid (25.0 mg, 60% yield). Mp: 124-125 °C.  $^1\text{H NMR}$  (500 MHz,  $\text{CDCl}_3$ )  $\delta$  7.88 (d,  $J = 8.3$  Hz, 2H), 7.83 (d,  $J = 8.7$  Hz, 2H), 7.61 (d,  $J = 8.5$  Hz, 2H), 7.41 (d,  $J = 7.7$  Hz, 2H), 7.31 (d,  $J = 8.0$  Hz, 2H), 7.25 (t,  $J = 7.8$  Hz, 2H), 7.08 (t,  $J = 7.3$  Hz, 1H), 2.41 (s, 3H).  $^{13}\text{C NMR}$  (126 MHz,  $\text{CDCl}_3$ )  $\delta$  144.55, 141.90, 139.41, 136.38, 132.48, 130.11, 129.84, 128.46, 128.44, 128.29, 125.07, 123.95, 21.52.

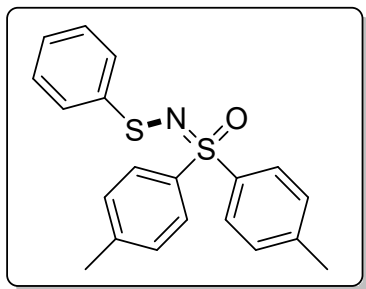

**((Phenylthio)imino)di-p-tolyl- $\lambda^6$ -sulfanone (3fa)**<sup>[1]</sup>: Following the general procedure and purification by column chromatography using petroleum ether/ethyl acetate (10:1) as eluent afforded the product as a white solid (25.4 mg, 72% yield). Mp: 108-110 °C; <sup>1</sup>H NMR (500 MHz, CDCl<sub>3</sub>)  $\delta$  7.91 (d,  $J$  = 8.1 Hz, 4H), 7.46 (d,  $J$  = 7.8 Hz, 2H), 7.30 (dd,  $J$  = 18.9, 7.8 Hz, 6H), 7.09 (t,  $J$  = 7.4 Hz, 1H), 2.42 (s, 6H). <sup>13</sup>C NMR (126 MHz, CDCl<sub>3</sub>)  $\delta$  144.01, 137.20, 129.93, 129.70, 128.36, 127.79, 124.80, 123.77, 21.48.

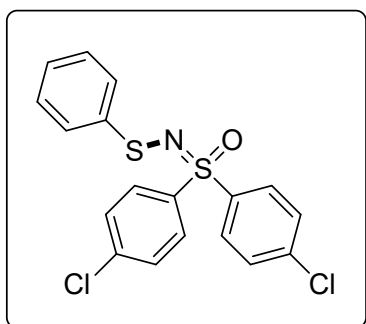

**Bis(4-chlorophenyl)((phenylthio)imino)- $\lambda^6$ -sulfanone(3ga)**<sup>[1]</sup>: Following the general procedure and purification by column chromatography using petroleum ether/ethyl acetate (10:1) as eluent afforded the product as a yellow solid (29.9 mg; 76% yield). Mp: 120-122 °C. <sup>1</sup>H NMR (500 MHz, CDCl<sub>3</sub>)  $\delta$  7.92 (d,  $J$  = 8.7 Hz, 4H), 7.48 (d,  $J$  = 8.7 Hz, 4H), 7.40 (d,  $J$  = 7.5 Hz, 2H), 7.27 (t,  $J$  = 7.8 Hz, 2H), 7.10 (t,  $J$  = 7.4 Hz, 1H). <sup>13</sup>C NMR (126 MHz, CDCl<sub>3</sub>)  $\delta$  141.43, 140.22, 138.08, 129.87, 129.71, 128.53, 125.36, 124.18.

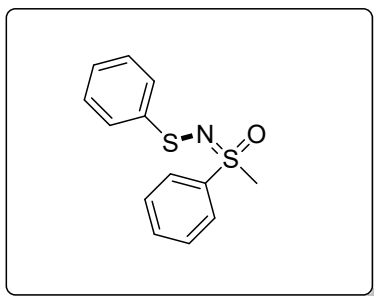

**Methyl(phenyl)[(phenylthio)imino]- $\lambda^6$ -sulfanone (3ha)**<sup>[4]</sup>: Following the general procedure and purification by column chromatography using petroleum ether/ethyl acetate (6:1) as eluent afforded the product as a yellow oil (16.6 mg, 63% yield).  **$^1\text{H}$  NMR** (500 MHz,  $\text{CDCl}_3$ )  $\delta$  7.98 (d,  $J = 7.3$  Hz, 2H), 7.69 (t,  $J = 7.4$  Hz, 1H), 7.60 (t,  $J = 7.6$  Hz, 2H), 7.42 (d,  $J = 7.4$  Hz, 2H), 7.29 (t,  $J = 7.8$  Hz, 2H), 7.11 (t,  $J = 7.3$  Hz, 1H), 3.31 (s, 3H).  **$^{13}\text{C}$  NMR** (126 MHz,  $\text{CDCl}_3$ )  $\delta$  142.06, 138.62, 133.70, 129.47, 128.47, 128.38, 125.05, 123.76, 43.71.

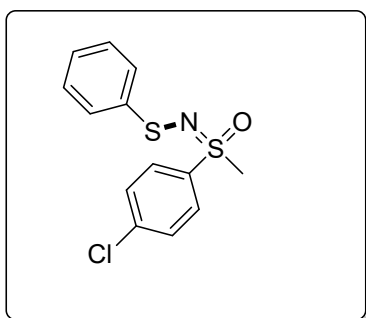

**(4-Chlorophenyl)(methyl)[(phenylthio)imino]- $\lambda^6$ -sulfanone (3ia)**<sup>[4]</sup>: Following the general procedure and purification by column chromatography using petroleum ether/ethyl acetate (6:1) as eluent afforded the product as a yellow solid (15.5 mg, 52% yield). Mp: 102 – 104 °C.  **$^1\text{H}$  NMR** (500 MHz,  $\text{CDCl}_3$ )  $\delta$  7.89 (d,  $J = 7.9$  Hz, 2H), 7.56 (d,  $J = 7.9$  Hz, 2H), 7.40 (d,  $J = 7.8$  Hz, 2H), 7.29 (t,  $J = 7.4$  Hz, 2H), 7.12 (t,  $J = 7.2$  Hz, 1H), 3.30 (s, 3H).  **$^{13}\text{C}$  NMR** (126 MHz,  $\text{CDCl}_3$ )  $\delta$  141.69, 140.50, 137.12, 129.89, 129.76, 128.51, 123.95, 43.81.

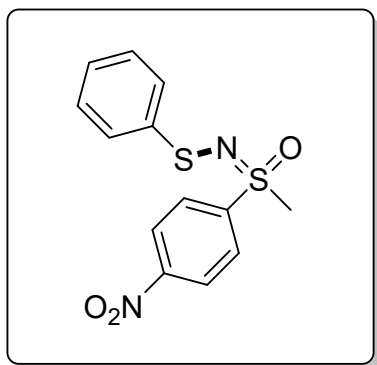

**Methyl(4-nitrophenyl)[(phenylthio)imino]- $\lambda^6$ -sulfanone (3ja)**<sup>[4]</sup>: Following the general procedure and purification by column chromatography using petroleum ether/ethyl acetate (10:1) as eluent afforded the product as a yellow solid (12.3 mg, 40% yield). Mp: 128 – 130 °C. <sup>1</sup>H NMR (500 MHz, CDCl<sub>3</sub>)  $\delta$  8.39 (d,  $J$  = 8.6 Hz, 2H), 8.12 (d,  $J$  = 8.6 Hz, 2H), 7.36 (d,  $J$  = 7.5 Hz, 2H), 7.27 (t,  $J$  = 7.5 Hz, 2H), 7.12 (t,  $J$  = 7.2 Hz, 1H), 3.35 (s, 3H). <sup>13</sup>C NMR (126 MHz, CDCl<sub>3</sub>)  $\delta$  150.77, 144.80, 140.97, 129.93, 128.62, 125.65, 124.49, 124.29, 43.61.

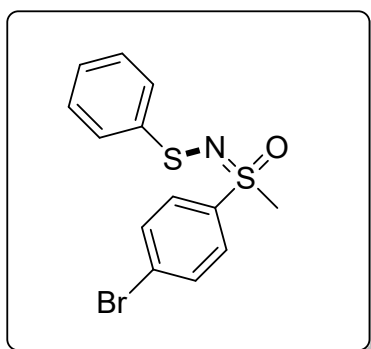

**(4-Bromophenyl)(methyl)[(phenylthio)imino]- $\lambda^6$ -sulfanone (3ka)**<sup>[4]</sup>: Following the general procedure and purification by column chromatography using petroleum ether/ethyl acetate (10:1) as eluent afforded the product as a yellow solid (19.2 mg, 56% yield). Mp: 109 – 111 °C. <sup>1</sup>H NMR (500 MHz, CDCl<sub>3</sub>)  $\delta$  7.75 (d,  $J$  = 8.5 Hz, 2H), 7.66 (d,  $J$  = 8.5 Hz, 2H), 7.33 (d,  $J$  = 7.5 Hz, 2H), 7.23 (t,  $J$  = 7.6 Hz, 2H), 7.06 (t,  $J$  =

7.3 Hz, 1H), 3.23 (s, 3H).  $^{13}\text{C}$  NMR (126 MHz,  $\text{CDCl}_3$ )  $\delta$  141.66, 137.69, 132.74, 129.96, 129.08, 128.51, 125.25, 123.97, 43.77.

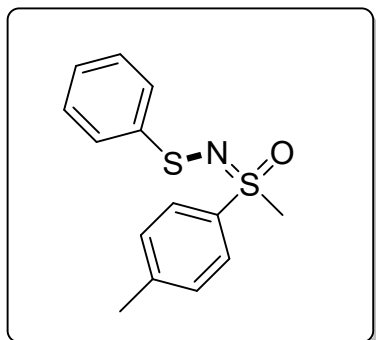

**Methyl[(phenylthio)imino](*p*-tolyl)- $\lambda^6$ -sulfanone (3la)**<sup>[4]</sup>: Following the general procedure and purification by column chromatography using petroleum ether/ethyl acetate (6:1) as eluent afforded the product as a yellow solid (11.7 mg, 42% yield). Mp: 121-126°C.  $^1\text{H}$  NMR (500 MHz,  $\text{CDCl}_3$ )  $\delta$  7.85 (d,  $J$  = 8.4 Hz, 2H), 7.40 (t,  $J$  = 9.2 Hz, 4H), 7.30 – 7.25 (m, 2H), 7.10 (t,  $J$  = 7.4 Hz, 1H), 3.28 (s, 3H), 2.48 (s, 3H).  $^{13}\text{C}$  NMR (126 MHz,  $\text{CDCl}_3$ )  $\delta$  144.75, 142.24, 135.55, 130.11, 128.41, 128.38, 124.92, 123.66, 43.83, 21.55.

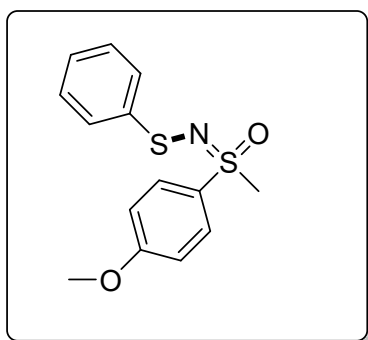

**(4-Methoxyphenyl)(methyl)[(phenylthio)imino]- $\lambda^6$ -sulfanone (3ma)**<sup>[4]</sup>: Following the general procedure and purification by column chromatography using petroleum ether/ethyl acetate (6:1) as eluent afforded the product as a white solid (17.6 mg, 60% yield). Mp: 70 – 72 °C.  $^1\text{H}$  NMR (500 MHz,  $\text{CDCl}_3$ )  $\delta$  7.89 (d,  $J$  = 8.6 Hz, 2H), 7.41

(d,  $J = 8.1$  Hz, 2H), 7.28 (t,  $J = 7.5$  Hz, 2H), 7.10 (t,  $J = 7.0$  Hz, 1H), 7.05 (d,  $J = 8.6$  Hz, 2H), 3.90 (s, 3H), 3.28 (s, 3H).  $^{13}\text{C}$  NMR (126 MHz,  $\text{CDCl}_3$ )  $\delta$  163.82, 142.32, 130.56, 129.67, 128.44, 124.92, 123.67, 114.71, 55.71, 44.07.

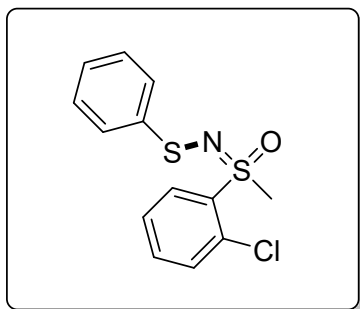

**(2-Chlorophenyl)(methyl)((phenylthio)imino)- $\lambda^6$ -sulfanone (3na)**<sup>[4]</sup>: Following the general procedure and purification by column chromatography using petroleum ether/ethyl acetate (6:1) as eluent afforded the product as a yellow oil (25.6 mg, 86% yield).  $^1\text{H}$  NMR (500 MHz,  $\text{CDCl}_3$ )  $\delta$  8.10 (d,  $J = 7.7$  Hz, 1H), 7.46 (dt,  $J = 12.3, 6.8$  Hz, 2H), 7.39 (t,  $J = 7.9$  Hz, 1H), 7.28 (d,  $J = 7.6$  Hz, 2H), 7.14 (t,  $J = 7.8$  Hz, 2H), 6.98 (t,  $J = 7.3$  Hz, 1H), 3.40 (s, 3H).  $^{13}\text{C}$  NMR (126 MHz,  $\text{CDCl}_3$ )  $\delta$  141.44, 135.75, 134.74, 132.85, 132.14, 132.07, 128.38, 127.48, 125.26, 124.48, 42.00.

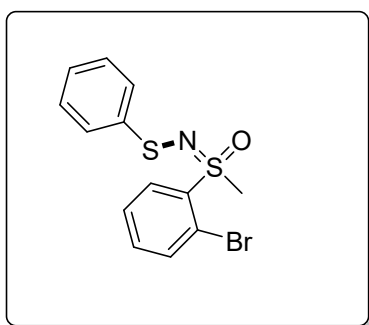

**(2-Bromophenyl)(methyl)((phenylthio)imino)- $\lambda^6$ -sulfanone (3oa)**: Following the general procedure and purification by column chromatography using petroleum ether/ethyl acetate (6:1) as eluent afforded the product as a yellow oil (19.1 mg, 56%

yield).  $^1\text{H NMR}$  (500 MHz,  $\text{CDCl}_3$ )  $\delta$  8.27 (d,  $J = 6.3$  Hz, 1H), 7.80 (d,  $J = 4.7$  Hz, 1H), 7.58 – 7.55 (m, 1H), 7.52 – 7.49 (m, 1H), 7.44 – 7.39 (m, 2H), 7.30 – 7.25 (m, 2H), 7.15 – 7.08 (m, 1H), 3.54 (s, 3H).  $^{13}\text{C NMR}$  (126 MHz,  $\text{CDCl}_3$ )  $\delta$  141.45, 137.54, 135.71, 134.67, 133.16, 128.40, 128.13, 125.29, 124.57, 120.62, 41.77. **HRMS (ESI)**  $m/z$  calcd for  $\text{C}_{13}\text{H}_{12}\text{NOS}_2\text{BrNa}$   $[\text{M}+\text{Na}]^+$ : 363.9441; found: 363.9445.

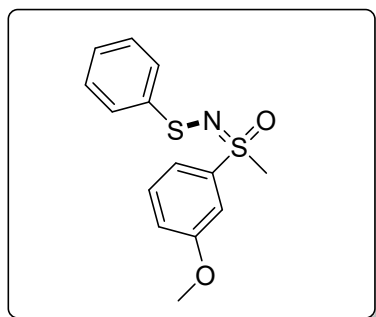

**(3-Methoxyphenyl)(methyl)((phenylthio)imino)- $\lambda^6$ -sulfanone (3pa)**<sup>[5]</sup>: Following the general procedure and purification by column chromatography using petroleum ether/ethyl acetate (6:1) as eluent afforded the product as a yellow oil (17.3 mg, 59% yield).  $^1\text{H NMR}$  (500 MHz,  $\text{CDCl}_3$ )  $\delta$  7.51 (dt,  $J = 15.8, 7.6$  Hz, 2H), 7.46 – 7.39 (m, 3H), 7.29 (t,  $J = 6.9$  Hz, 2H), 7.19 (d,  $J = 7.4$  Hz, 1H), 7.11 (t,  $J = 6.9$  Hz, 1H), 3.85 (s, 3H), 3.30 (s, 3H).  $^{13}\text{C NMR}$  (126 MHz,  $\text{CDCl}_3$ )  $\delta$  160.23, 142.10, 139.86, 130.50, 128.48, 125.07, 123.85, 120.51, 120.39, 112.72, 55.70, 43.86.

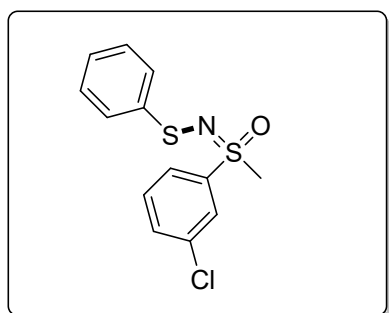

**(3-Chlorophenyl)(methyl)((phenylthio)imino)- $\lambda^6$ -sulfanone (3qa)**<sup>[4]</sup>: Following the general procedure and purification by column chromatography using petroleum

ether/ethyl acetate (6:1) as eluent afforded the product as a yellow oil (14.0 mg, 47% yield).  $^1\text{H NMR}$  (500 MHz,  $\text{CDCl}_3$ )  $\delta$  7.92 (s, 1H), 7.80 (d,  $J = 7.7$  Hz, 1H), 7.60 (d,  $J = 7.9$  Hz, 1H), 7.49 (t,  $J = 7.9$  Hz, 1H), 7.37 (d,  $J = 8.1$  Hz, 2H), 7.26 (t,  $J = 7.5$  Hz, 2H), 7.09 (t,  $J = 6.9$  Hz, 1H), 3.27 (s, 3H).  $^{13}\text{C NMR}$  (126 MHz,  $\text{CDCl}_3$ )  $\delta$  141.53, 140.51, 135.74, 133.82, 130.66, 128.55, 128.52, 126.47, 125.35, 124.11, 43.73.

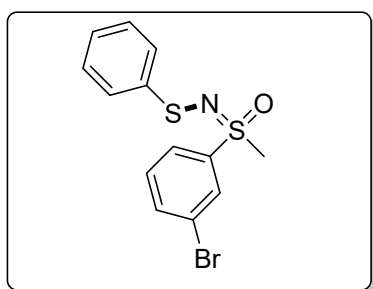

**(3-Bromophenyl)(methyl)((phenylthio)imino)- $\lambda^6$ -sulfanone (3ra)**<sup>[5]</sup>: Following the general procedure and purification by column chromatography using petroleum ether/ethyl acetate (6:1) as eluent afforded the product as a yellow oil (27.7 mg, 81% yield).  $^1\text{H NMR}$  (500 MHz,  $\text{CDCl}_3$ )  $\delta$  8.08 (s, 1H), 7.86 (d,  $J = 7.8$  Hz, 1H), 7.77 (d,  $J = 7.9$  Hz, 1H), 7.44 (t,  $J = 7.9$  Hz, 1H), 7.38 (d,  $J = 8.0$  Hz, 2H), 7.28 (d,  $J = 7.4$  Hz, 2H), 7.10 (t,  $J = 6.9$  Hz, 1H), 3.29 (s, 3H).  $^{13}\text{C NMR}$  (126 MHz,  $\text{CDCl}_3$ )  $\delta$  141.51, 140.61, 136.75, 131.39, 130.88, 128.54, 126.93, 125.37, 124.12, 123.49, 43.80.

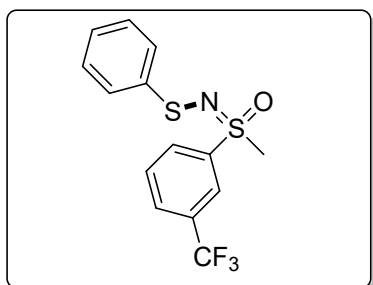

**Methyl((phenylthio)imino)(3-(trifluoromethyl)phenyl)- $\lambda^6$ -sulfanone (3sa):**

Following the general procedure and purification by column chromatography using



petroleum ether/ethyl acetate (6:1) as eluent afforded the product as a yellow oil (21.2 mg, 64% yield). **<sup>1</sup>H NMR** (500 MHz, CDCl<sub>3</sub>) δ 8.22 (s, 1H), 8.15 (d, *J* = 7.7 Hz, 1H), 7.93 (d, *J* = 7.6 Hz, 1H), 7.74 (t, *J* = 7.7 Hz, 1H), 7.39 (d, *J* = 7.6 Hz, 2H), 7.29 (t, *J* = 7.4 Hz, 2H), 7.13 (t, *J* = 7.2 Hz, 1H), 3.34 (s, 3H). **<sup>13</sup>C NMR** (126 MHz, CDCl<sub>3</sub>) δ 140.8 (d, *J* = 153.8 Hz), 132.23 (q, *J* = 33.8 Hz), 131.8, 130.46 (q, *J* = 2.5 Hz), 130.3, 128.63, 125.69 (q, *J* = 3.8 Hz), 125.53, 124.23, 123.06 (q, *J* = 272.5 Hz). **<sup>19</sup>F NMR** (471 MHz, CDCl<sub>3</sub>) δ -62.75. **HRMS (ESI)** *m/z* calcd for C<sub>14</sub>H<sub>12</sub>NOF<sub>3</sub>NaS<sub>2</sub> [M+Na]<sup>+</sup> 354.0207, found 354.0210.

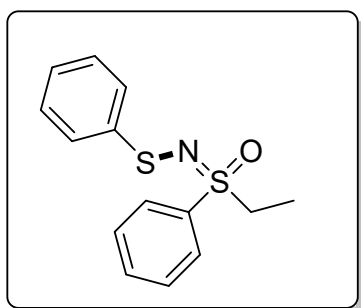

**Ethyl(phenyl)((phenylthio)imino)-λ<sup>6</sup>-sulfanone (3ta)**<sup>31</sup>: Following the general procedure and purification by column chromatography using petroleum ether/ethyl acetate (10:1) as eluent afforded the product as a yellow oil (18.2 mg, 66% yield). **<sup>1</sup>H NMR** (500 MHz, CDCl<sub>3</sub>) δ 7.93 (d, *J* = 7.6 Hz, 2H), 7.68 (t, *J* = 7.4 Hz, 1H), 7.60 (t, *J* = 7.6 Hz, 2H), 7.42 (d, *J* = 7.7 Hz, 2H), 7.28 (t, *J* = 7.7 Hz, 2H), 7.10 (t, *J* = 7.3 Hz, 1H), 3.46 (ddq, *J* = 65.1, 14.6, 7.4 Hz, 2H), 1.33 (t, *J* = 7.4 Hz, 3H). **<sup>13</sup>C NMR** (126 MHz, CDCl<sub>3</sub>) δ 142.37, 136.54, 133.62, 129.35, 129.15, 128.38, 124.86, 123.63, 50.20, 7.74.

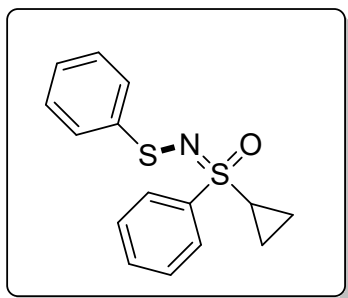

**Cyclopropyl(phenyl)((phenylthio)imino)- $\lambda^6$ -sulfanone (3ua)**<sup>[3]</sup>: Following the general procedure and purification by column chromatography using petroleum ether/ethyl acetate (6:1) as eluent afforded the product as a colorless oil (14.7 mg, 51% yield). <sup>1</sup>H NMR (500 MHz, CDCl<sub>3</sub>)  $\delta$  7.92 (d,  $J$  = 7.7 Hz, 2H), 7.65 (t,  $J$  = 7.3 Hz, 1H), 7.57 (t,  $J$  = 7.6 Hz, 2H), 7.39 (d,  $J$  = 7.8 Hz, 2H), 7.29 – 7.25 (m, 2H), 7.09 (t,  $J$  = 7.4 Hz, 1H), 2.70 (tt,  $J$  = 8.0, 4.7 Hz, 1H), 1.73 – 1.67 (m, 1H), 1.28 – 1.15 (m, 2H), 0.95 (p,  $J$  = 7.8 Hz, 1H). <sup>13</sup>C NMR (126 MHz, CDCl<sub>3</sub>)  $\delta$  142.53, 139.03, 133.28, 129.29, 128.35, 124.81, 123.60, 32.91, 6.62, 5.56.

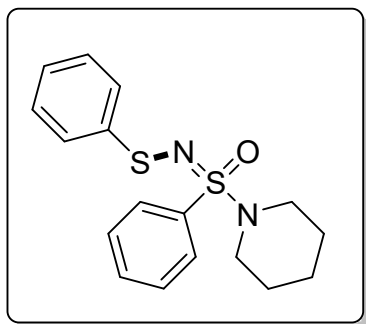

***N*-[Oxo(phenyl)(piperidin-1-yl)- $\lambda^6$ -sulfaneylidene]-*S*-phenylthiohydroxylamine (3va)**<sup>[4]</sup>: Following the general procedure and purification by column chromatography using petroleum ether/ethyl acetate (10:1) as eluent afforded the product as a yellow solid (22.5 mg, 68% yield). Mp: 138 – 140 °C. <sup>1</sup>H NMR (500 MHz, CDCl<sub>3</sub>)  $\delta$  7.86 (d,  $J$  = 7.7 Hz, 2H), 7.53 (t,  $J$  = 7.3 Hz, 1H), 7.47 (t,  $J$  = 7.5 Hz, 2H), 7.36 (d,  $J$  = 7.8 Hz,

2H), 7.18 (t,  $J = 7.7$  Hz, 2H), 6.99 (t,  $J = 7.4$  Hz, 1H), 2.97 (hept,  $J = 5.8, 5.2$  Hz, 4H), 1.55 (p,  $J = 5.6$  Hz, 4H), 1.36 (q,  $J = 6.3$  Hz, 2H).  $^{13}\text{C}$  NMR (126 MHz,  $\text{CDCl}_3$ )  $\delta$  142.03, 135.94, 132.61, 128.89, 128.42, 127.90, 124.79, 123.79, 47.48, 25.17, 23.56.

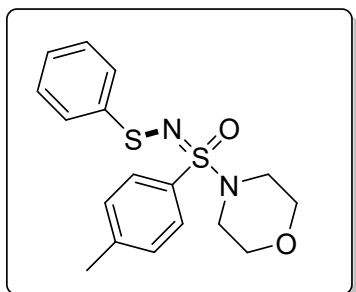

***N*-(Morpholino(oxo)(*p*-tolyl)- $\lambda^6$ -sulfaneylidene)-*S*-phenylthiohydroxylamine**

**(3wa)**<sup>[4]</sup>: Following the general procedure and purification by column chromatography using petroleum ether/ethyl acetate (10:1) as eluent afforded the product as a white solid (21.0 mg, 60% yield). Mp: 115-117 °C.  $^1\text{H}$  NMR (500 MHz,  $\text{CDCl}_3$ )  $\delta$  7.80 (d,  $J = 7.5$  Hz, 2H), 7.44 (d,  $J = 7.9$  Hz, 2H), 7.37 (d,  $J = 7.7$  Hz, 2H), 7.28 (d,  $J = 8.1$  Hz, 2H), 7.09 (t,  $J = 6.9$  Hz, 1H), 3.72 (t,  $J = 4.9$  Hz, 4H), 3.02 (ddd,  $J = 23.6, 12.1, 6.8$  Hz, 4H), 2.46 (s, 3H).  $^{13}\text{C}$  NMR (126 MHz,  $\text{CDCl}_3$ )  $\delta$  144.07, 141.61, 131.44, 129.73, 128.51, 128.15, 125.07, 124.02, 66.09, 46.64, 21.51.

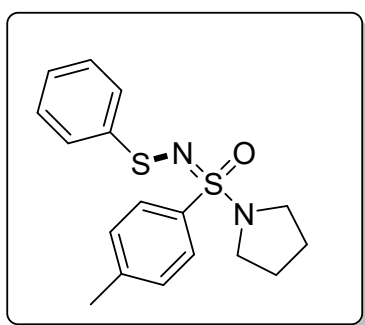

***N*-(Oxo(pyrrolidin-1-yl)(*p*-tolyl)- $\lambda^6$ -sulfaneylidene)-*S*-phenylthiohydroxylamine**

**(3xa)**: Following the general procedure and purification by column chromatography

using petroleum ether/ethyl acetate (10:1) as eluent afforded the product as a white solid (19.6 mg, 59% yield). Mp: 87-90 °C.  $^1\text{H NMR}$  (500 MHz,  $\text{CDCl}_3$ )  $\delta$  7.89 (d,  $J = 8.2$  Hz, 2H), 7.44 (d,  $J = 7.7$  Hz, 2H), 7.35 (d,  $J = 8.1$  Hz, 2H), 7.29 – 7.24 (m, 2H), 7.08 (t,  $J = 7.3$  Hz, 1H), 3.28 (dtt,  $J = 13.7, 9.5, 4.8$  Hz, 4H), 2.46 (s, 3H), 1.82 – 1.77 (m, 4H).  $^{13}\text{C NMR}$  (126 MHz,  $\text{CDCl}_3$ )  $\delta$  143.53, 142.25, 133.30, 129.63, 128.39, 128.03, 124.66, 123.57, 25.32, 21.49. **HRMS (ESI)**  $m/z$  calcd for  $\text{C}_{17}\text{H}_{21}\text{N}_2\text{OS}_2$   $[\text{M}+\text{H}]^+$  333.1095, found 333.1100.

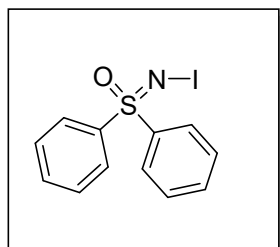

**(iodoimino)diphenyl- $\lambda^6$ -sulfanone (1y)**<sup>[7]</sup>: Following the general procedure and purification by column chromatography using petroleum ether/ethyl acetate (6:1) as eluent afforded the product as a yellow solid (6.9 mg, 20% yield). Mp: 114.2–114.9 °C.  $^1\text{H NMR}$  (500 MHz,  $\text{CDCl}_3$ )  $\delta$  7.94 (d,  $J = 7.4$  Hz, 2H), 7.57 (t,  $J = 7.3$  Hz, 1H), 7.50 (t,  $J = 7.5$  Hz, 2H).

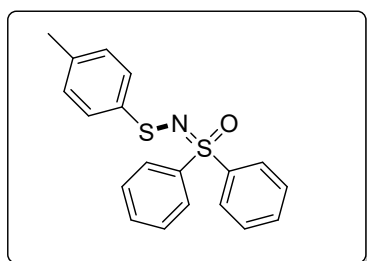

**Diphenyl((p-tolylthio)imino)- $\lambda^6$ -sulfanone (3ab)**<sup>[1]</sup>: Following the general procedure and purification by column chromatography using petroleum ether/ethyl acetate (10:1) as eluent afforded the product as a yellow solid (23.1 mg, 68% yield). Mp: 110-112

°C.  $^1\text{H NMR}$  (500 MHz,  $\text{CDCl}_3$ )  $\delta$  8.01 (d,  $J = 7.4$  Hz, 4H), 7.56 (t,  $J = 7.4$  Hz, 2H), 7.50 (t,  $J = 7.7$  Hz, 4H), 7.35 (d,  $J = 7.8$  Hz, 2H), 7.07 (d,  $J = 7.9$  Hz, 2H), 2.29 (s, 3H).  $^{13}\text{C NMR}$  (126 MHz,  $\text{CDCl}_3$ )  $\delta$  140.04, 138.25, 133.08, 129.26, 129.23, 128.49, 125.18, 20.99.

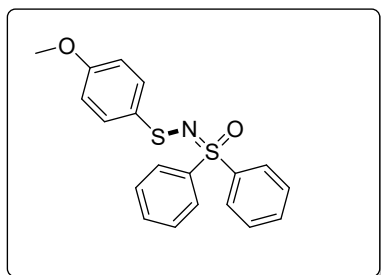

**(((4-Methoxyphenyl)thio)imino)diphenyl- $\lambda^6$ -sulfanone (3ac)<sup>[1]</sup>:** Following the general procedure and purification by column chromatography using petroleum ether/ethyl acetate (10:1) as eluent afforded the product as a yellow oil (26.2 mg 74% yield).  $^1\text{H NMR}$  (500 MHz,  $\text{CDCl}_3$ )  $\delta$  7.98 (d,  $J = 7.1$  Hz, 4H), 7.52 – 7.43 (m, 8H), 6.82 (d,  $J = 8.7$  Hz, 2H), 3.77 (s, 3H).  $^{13}\text{C NMR}$  (126 MHz,  $\text{CDCl}_3$ )  $\delta$  158.68, 140.14, 133.08, 131.96, 129.49, 129.28, 128.53, 114.28, 55.37.

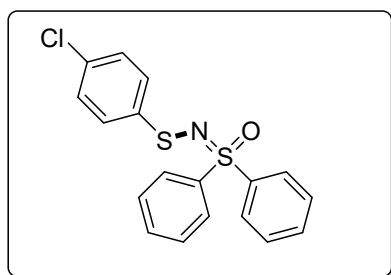

**(((4-Chlorophenyl)thio)imino)diphenyl- $\lambda^6$ -sulfanone (3ad)<sup>[1]</sup>:** Following the general procedure and purification by column chromatography using petroleum ether/ethyl acetate (10:1) as eluent afforded the product as a white solid (20.3 mg, 56% yield). Mp: 121-123°C.  $^1\text{H NMR}$  (500 MHz,  $\text{CDCl}_3$ )  $\delta$  8.03 (d,  $J = 7.8$  Hz, 4H), 7.62

– 7.58 (m, 2H), 7.54 (t,  $J = 7.4$  Hz, 4H), 7.38 (d,  $J = 8.3$  Hz, 2H), 7.23 (d,  $J = 8.2$  Hz, 2H).  $^{13}\text{C}$  NMR (126 MHz,  $\text{CDCl}_3$ )  $\delta$  140.89, 139.68, 133.30, 130.51, 129.37, 128.46, 128.37, 125.15.

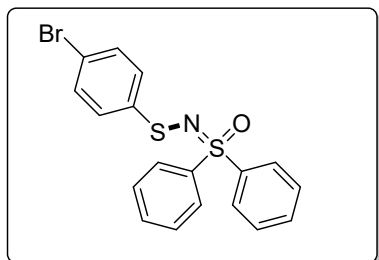

**(((4-Bromophenyl)thio)imino)diphenyl- $\lambda^6$ -sulfanone (3ae)**<sup>[1]</sup>: Following the general procedure and purification by column chromatography using petroleum ether/ethyl acetate (10:1) as eluent afforded the product as a white solid (26.3 mg, 65% yield). Mp: 122-124°C.  $^1\text{H}$  NMR (500 MHz,  $\text{CDCl}_3$ )  $\delta$  8.01 (d,  $J = 7.1$  Hz, 4H), 7.57 (t,  $J = 7.3$  Hz, 2H), 7.51 (t,  $J = 7.7$  Hz, 4H), 7.35 (d,  $J = 8.5$  Hz, 2H), 7.29 (d,  $J = 8.6$  Hz, 2H).  $^{13}\text{C}$  NMR (126 MHz,  $\text{CDCl}_3$ )  $\delta$  141.67, 139.68, 133.29, 131.30, 129.35, 128.36, 125.33.

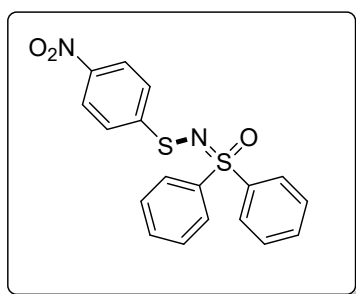

**(((4-Nitrophenyl)thio)imino)diphenyl- $\lambda^6$ -sulfanone (3af)**<sup>[3]</sup>: Following the general procedure and purification by column chromatography using petroleum ether/ethyl acetate (10:1) as eluent afforded the product as a yellow solid (15.1 mg, 41% yield). Mp: 164-165°C.  $^1\text{H}$  NMR (500 MHz,  $\text{CDCl}_3$ )  $\delta$  8.09 (d,  $J = 8.6$  Hz, 2H), 8.02 (d,  $J =$

7.8 Hz, 4H), 7.62 (t,  $J = 7.0$  Hz, 2H), 7.56 (t,  $J = 7.5$  Hz, 4H), 7.48 (d,  $J = 8.6$  Hz, 2H).

$^{13}\text{C}$  NMR (126 MHz,  $\text{CDCl}_3$ )  $\delta$  153.44, 144.67, 139.33, 133.64, 129.57, 128.32, 123.64.

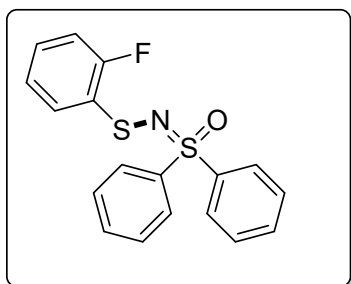

**(((2-Fluorophenyl)thio)imino)diphenyl- $\lambda^6$ -sulfanone (3ag)**<sup>[1]</sup>: Following the general procedure and purification by column chromatography using petroleum ether/ethyl acetate (10:1) as eluent afforded the product as a white solid (30.9 mg, 90% yield). Mp: 107-109 °C.  $^1\text{H}$  NMR (500 MHz,  $\text{CDCl}_3$ )  $\delta$  8.03 (d,  $J = 7.4$  Hz, 4H), 7.77 – 7.72 (m, 1H), 7.57 (t,  $J = 7.3$  Hz, 2H), 7.51 (t,  $J = 7.5$  Hz, 4H), 7.12 (t,  $J = 7.1$  Hz, 1H), 7.08 – 7.03 (m, 1H), 6.90 (t,  $J = 8.8$  Hz, 1H).  $^{13}\text{C}$  NMR (126 MHz,  $\text{CDCl}_3$ )  $\delta$  157.11 (d,  $J = 240.0$  Hz), 139.80, 133.38, 129.76 (d,  $J = 16.2$  Hz), 129.45, 128.46, 126.27 (d,  $J = 2.5$  Hz), 126.11 (d,  $J = 6.25$  Hz), 124.46 (d,  $J = 2.5$  Hz), 144.50 (d,  $J = 20.0$  Hz).

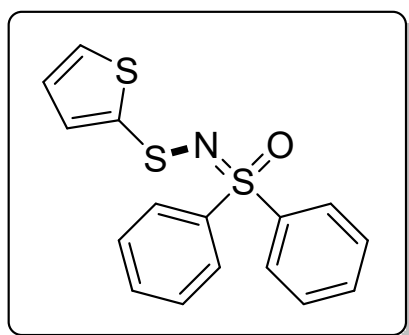

**Diphenyl((thiophen-2-ylthio)imino)- $\lambda^6$ -sulfanone (3ah)**<sup>[1]</sup>: Following the general procedure and purification by column chromatography using petroleum ether/ethyl

acetate (10:1) as eluent afforded the product as a yellow oil (14.5 mg, 44% yield).  $^1\text{H}$  NMR (500 MHz,  $\text{CDCl}_3$ )  $\delta$  7.96 (d,  $J = 7.9$  Hz, 4H), 7.56 – 7.52 (m, 2H), 7.48 (t,  $J = 7.5$  Hz, 4H), 7.38 (d,  $J = 5.2$  Hz, 1H), 7.13 (d,  $J = 3.3$  Hz, 1H), 6.91 – 6.87 (m, 1H).  $^{13}\text{C}$  NMR (126 MHz,  $\text{CDCl}_3$ )  $\delta$  139.83, 133.76, 133.05, 130.92, 129.20, 128.47, 127.15.

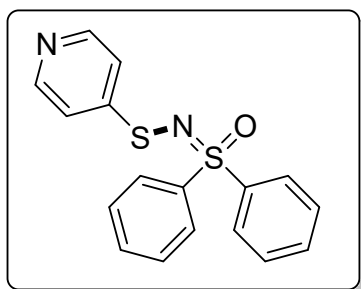

**Diphenyl((pyridin-4-ylthio)imino)- $\lambda^6$ -sulfanone (3ai)**<sup>[3]</sup>: Following the general procedure and purification by column chromatography using petroleum ether/ethyl acetate (6:1) as eluent afforded the product as a white solid (27.1 mg, 83% yield). Mp: 102-104 °C.  $^1\text{H}$  NMR (500 MHz,  $\text{CDCl}_3$ )  $\delta$  8.36 (s, 2H), 8.02 (d,  $J = 7.4$  Hz, 4H), 7.61 (t,  $J = 7.4$  Hz, 2H), 7.54 (t,  $J = 7.5$  Hz, 4H), 7.31 (s, 2H).  $^{13}\text{C}$  NMR (126 MHz,  $\text{CDCl}_3$ )  $\delta$  155.18, 148.28, 139.37, 133.55, 129.51, 128.32, 117.01.

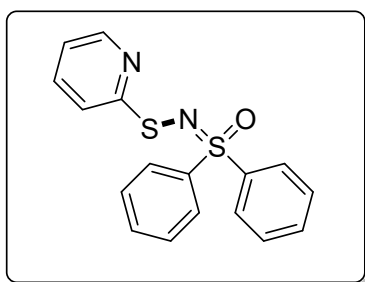

**Diphenyl((pyridin-2-ylthio)imino)- $\lambda^6$ -sulfanone (3aj)**<sup>[3]</sup>: Following the general procedure and purification by column chromatography using petroleum ether/ethyl acetate (6:1) as eluent afforded the product as a white solid (25.5 mg, 78% yield). Mp:



105-106°C.  $^1\text{H NMR}$  (500 MHz,  $\text{CDCl}_3$ )  $\delta$  8.31 (d,  $J = 3.7$  Hz, 1H), 8.03 (d,  $J = 7.7$  Hz, 4H), 7.71 (d,  $J = 8.1$  Hz, 1H), 7.59 – 7.49 (m, 7H), 6.94 – 6.88 (m, 1H).  $^{13}\text{C NMR}$  (126 MHz,  $\text{CDCl}_3$ )  $\delta$  166.05, 148.35, 139.58, 136.57, 133.33, 129.39, 128.42, 118.92, 117.89.

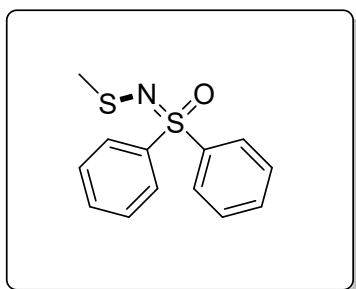

**((Methylthio)imino)diphenyl- $\lambda^6$ -sulfanone (3ak):** Following the general procedure and purification by column chromatography using petroleum ether/ethyl acetate (6:1) as eluent afforded the product as a Colorless oil (11.9 mg, 45% yield).  $^1\text{H NMR}$  (500 MHz,  $\text{CDCl}_3$ )  $\delta$  8.04 (ddd,  $J = 37.1, 19.3, 7.7$  Hz, 4H), 7.63 – 7.45 (m, 6H), 2.58 (s, 3H).  $^{13}\text{C NMR}$  (126 MHz,  $\text{CDCl}_3$ )  $\delta$  133.04, 129.28, 128.48, 25.93. **HRMS (ESI)**  $m/z$  calcd for  $\text{C}_{13}\text{H}_{13}\text{NONaS}_2$   $[\text{M}+\text{Na}]^+$  286.0336, found 286.0333.

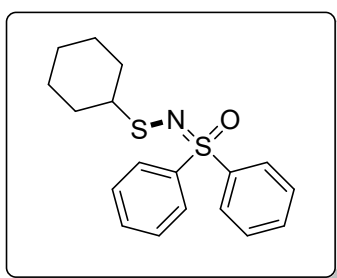

**((Cyclohexylthio)imino)diphenyl- $\lambda^6$ -sulfanone (3al):** Following the general procedure and purification by column chromatography using petroleum ether/ethyl acetate (10:1) as eluent afforded the product as a Colorless oil (13.9 mg, 42% yield).  $^1\text{H NMR}$  (500 MHz,  $\text{CDCl}_3$ )  $\delta$  7.96 (d,  $J = 7.7$  Hz, 4H), 7.49 (dt,  $J = 14.9, 7.2$  Hz,

6H), 3.02 (t,  $J = 8.3$  Hz, 1H), 2.08 (d,  $J = 11.2$  Hz, 2H), 1.78 – 1.72 (m, 2H), 1.59 (d,  $J = 12.0$  Hz, 1H), 1.29 (dt,  $J = 23.5, 11.6$  Hz, 5H).  $^{13}\text{C}$  NMR (126 MHz,  $\text{CDCl}_3$ )  $\delta$  140.55, 132.78, 129.16, 128.42, 50.39, 31.25, 25.95, 25.91. HRMS (ESI)  $m/z$  calcd for  $\text{C}_{18}\text{H}_{21}\text{NONaS}_2$   $[\text{M}+\text{Na}]^+$  354.0962, found 354.0964.

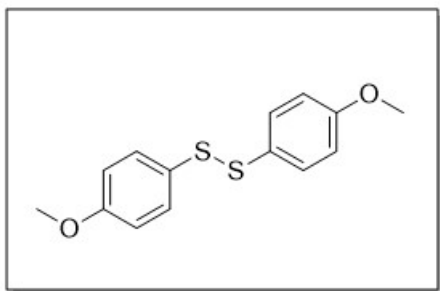

**1,2-Bis(4-methoxyphenyl) disulfane (2c)**<sup>[8]</sup>: Following the general procedure and purification by column chromatography using petroleum ether/ethyl acetate (100:1) as eluent afforded the product as a white solid (4.5 mg, 16% yield). Mp: 42–44 °C.  $^1\text{H}$  NMR (500 MHz,  $\text{CDCl}_3$ )  $\delta$  7.41 (d,  $J = 6.8$  Hz, 4H), 6.84 (d,  $J = 6.8$  Hz, 4H), 3.80 (s, 6H).

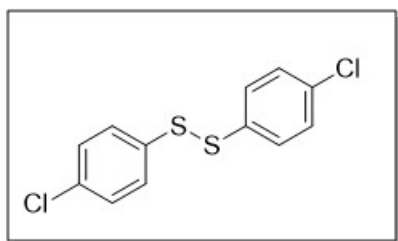

**Bis(4-chlorophenyl) disulfide (2d)**<sup>[9]</sup>: Following the general procedure and purification by column chromatography using petroleum ether/ethyl acetate (100:1) as eluent afforded the product as a White solid (5.7 mg, 20% yield). Mp: 71–72 °C.  $^1\text{H}$  NMR (500 MHz,  $\text{CDCl}_3$ )  $\delta$  7.44 (d,  $J = 8.4$  Hz, 4H), 7.31 (d,  $J = 8.3$  Hz, 4H).

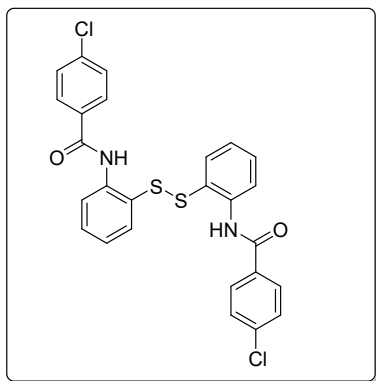

***N,N'*-(Disulfanediyldis(2,1-phenylene))bis(4-chlorobenzamide) (2m)<sup>[6]</sup>:** The resulting solid was dried at rt to afford a white solid (1576.4 mg, 74% yield). Mp: 178.0–178.8°C. <sup>1</sup>H NMR (500 MHz, CDCl<sub>3</sub>) δ 8.83 (s, 2H), 8.44 (d, *J* = 8.3 Hz, 2H), 7.59 (d, *J* = 8.0 Hz, 4H), 7.48 (d, *J* = 7.8 Hz, 2H), 7.43 (d, *J* = 8.1 Hz, 4H), 7.31 (t, *J* = 7.8 Hz, 2H), 6.99 (t, *J* = 7.5 Hz, 2H).

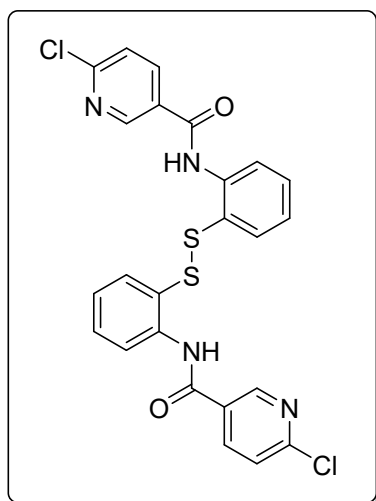

***N,N'*-(Disulfanediyldis(2,1-phenylene))bis(6-chloronicotinamide) (2n)<sup>[6]</sup>:** Recrystallization from CHCl<sub>3</sub> gave **2n** as colorless needles (474.7 mg, 44.8% yield). Mp: 216.1–218.0°C. <sup>1</sup>H NMR (500 MHz, DMSO-*d*<sub>6</sub>) δ 10.57 (s, 2H), 8.95 (s, 2H), 8.34 (d, *J* = 8.4 Hz, 2H), 7.69 (dd, *J* = 26.0, 8.1 Hz, 4H), 7.39 – 7.29 (m, 6H).

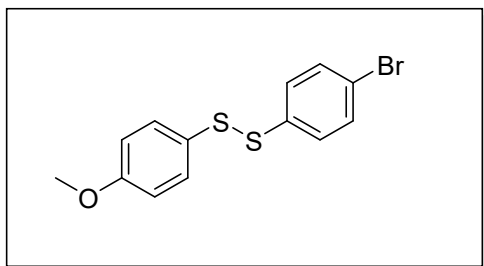

**1-(4-bromophenyl)-2-(4-methoxyphenyl)disulfane (2o)**<sup>[10]</sup>: Following the general procedure and purification by column chromatography using petroleum ether/ethyl acetate (100:1) as eluent afforded the product as yellow liquid (589 mg, 50% yield). <sup>1</sup>H NMR (500 MHz, CDCl<sub>3</sub>) δ 7.46 – 7.38 (m, 6H), 6.86 (d, *J* = 8.7 Hz, 2H), 3.81 (s, 3H).

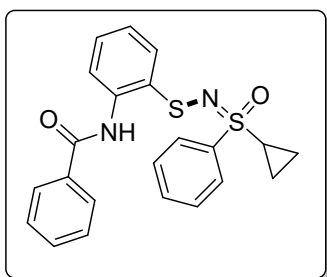

**N-(2-(((Cyclopropyl(oxo)(phenyl)-λ<sup>6</sup>-sulfaneylidene)amino)thio)phenyl)benzamide (4a)**: Following the general procedure and purification by column chromatography using petroleum ether/ethyl acetate (6:1) as eluent afforded the product as a yellow oil (29.8 mg, 73% yield). <sup>1</sup>H NMR (500 MHz, CDCl<sub>3</sub>) δ 10.14 (s, 1H), 8.49 (d, *J* = 8.1 Hz, 1H), 8.10 (d, *J* = 7.6 Hz, 2H), 7.70 (d, *J* = 7.9 Hz, 2H), 7.57 – 7.51 (m, 2H), 7.43 (dt, *J* = 23.5, 7.7 Hz, 4H), 7.30 (dd, *J* = 14.8, 7.0 Hz, 2H), 6.91 (t, *J* = 7.5 Hz, 1H), 2.54 (tt, *J* = 8.2, 4.8 Hz, 1H), 1.55 (ddt, *J* = 10.2, 7.4, 4.9 Hz, 1H), 1.13 – 1.01 (m, 2H), 0.85 (ddd, *J* = 13.1, 10.3, 6.6 Hz, 1H). <sup>13</sup>C NMR (126 MHz, CDCl<sub>3</sub>) δ 164.97, 139.25, 137.96, 134.78, 133.31, 131.60, 130.56, 129.36, 129.06, 128.45, 128.06,

127.33, 123.40, 120.91, 32.43, 6.39, 5.43. **HRMS (ESI)**  $m/z$  calcd for  $C_{22}H_{20}N_2O_2NaS_2$   $[M+Na]^+$  431.0864, found 431.0863.

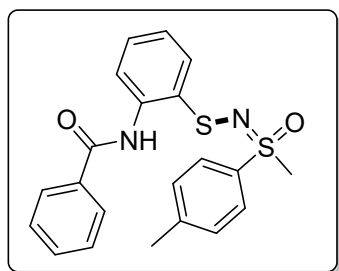

***N*-(2-(((Methyl(oxo)(p-tolyl)- $\lambda^6$ -sulfaneylidene)amino)thio)phenyl)benzamide**

**(4b):** Following the general procedure and purification by column chromatography using petroleum ether/ethyl acetate (6:1) as eluent afforded the product as a yellow oil (27.8 mg, 70% yield).  **$^1H$  NMR** (500 MHz,  $CDCl_3$ )  $\delta$  9.99 (s, 1H), 8.46 (d,  $J = 8.0$  Hz, 1H), 8.06 (d,  $J = 6.9$  Hz, 2H), 7.60 (d,  $J = 8.2$  Hz, 2H), 7.52 (t,  $J = 7.6$  Hz, 1H), 7.45 (t,  $J = 7.7$  Hz, 2H), 7.31 (d,  $J = 7.7$  Hz, 2H), 7.20 (d,  $J = 7.8$  Hz, 2H), 6.92 (t,  $J = 7.7$  Hz, 1H), 3.14 (s, 3H), 2.39 (s, 3H).  **$^{13}C$  NMR** (126 MHz,  $CDCl_3$ )  $\delta$  165.12, 144.96, 139.36, 134.96, 134.75, 131.76, 131.28, 130.00, 129.69, 128.63, 128.29, 128.10, 127.46, 123.64, 121.14, 43.54, 21.59. **HRMS (ESI)**  $m/z$  calcd for  $C_{21}H_{20}N_2O_2NaS_2$   $[M+Na]^+$  419.0864, found 419.0864.

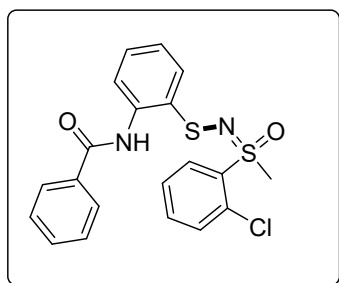

***N*-(2-(((2-Chlorophenyl)(methyl)(oxo)- $\lambda^6$ -sulfaneylidene)amino)thio)phenyl)benzamide (4c):** Following the general procedure and purification by column

chromatography using petroleum ether/ethyl acetate (6:1) as eluent afforded the product as a yellow oil (33.4 mg, 80% yield). **<sup>1</sup>H NMR** (500 MHz, CDCl<sub>3</sub>) δ 9.89 (s, 1H), 8.45 (d, *J* = 8.2 Hz, 1H), 8.15 (dd, *J* = 7.6, 2.1 Hz, 1H), 8.11 – 8.08 (m, 2H), 7.56 – 7.53 (m, 1H), 7.50 – 7.46 (m, 3H), 7.44 – 7.41 (m, 1H), 7.33 – 7.26 (m, 2H), 7.04 (d, *J* = 7.6 Hz, 1H), 6.80 (t, *J* = 7.3 Hz, 1H), 3.42 (d, *J* = 2.6 Hz, 3H). **<sup>13</sup>C NMR** (126 MHz, CDCl<sub>3</sub>) δ 164.86, 139.75, 135.00, 134.82, 134.72, 132.51, 132.02, 131.71, 131.64, 131.23, 129.89, 128.54, 127.30, 126.36, 123.20, 120.84, 42.01. **HRMS (ESI)** *m/z* calcd for C<sub>20</sub>H<sub>17</sub>N<sub>2</sub>O<sub>2</sub>NaS<sub>2</sub>Cl [M+Na]<sup>+</sup> 439.0318, found 439.0323.

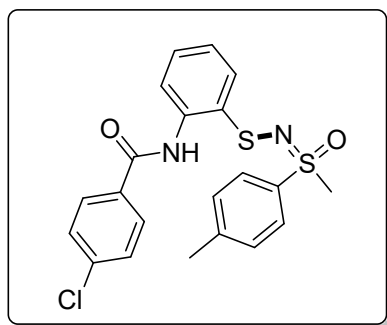

**4-Chloro-N-(2-(((methyl(oxo)(p-tolyl)-λ<sup>6</sup>-sulfaneylidene)amino)thio)phenyl)benzamide (4d):** Following the general procedure and purification by column chromatography using petroleum ether/ethyl acetate (6:1) as eluent afforded the product as a white solid (21.5 mg, 50% yield). Mp: 118-120°C. **<sup>1</sup>H NMR** (500 MHz, CDCl<sub>3</sub>) δ 10.02 (s, 1H), 8.44 (d, *J* = 8.3 Hz, 1H), 7.99 (d, *J* = 8.2 Hz, 2H), 7.61 (d, *J* = 8.0 Hz, 2H), 7.41 (d, *J* = 8.2 Hz, 2H), 7.35 – 7.31 (m, 2H), 7.24 (d, *J* = 8.0 Hz, 2H), 6.94 (t, *J* = 7.5 Hz, 1H), 3.16 (s, 3H), 2.42 (s, 3H). **<sup>13</sup>C NMR** (126 MHz, CDCl<sub>3</sub>) δ 163.99, 145.05, 139.21, 137.91, 134.69, 133.37, 131.21, 130.00, 129.75, 128.88,

128.80, 128.20, 128.00, 123.77, 121.10, 43.40, 21.55. **HRMS (ESI)**  $m/z$  calcd for  $C_{21}H_{19}N_2O_2NaS_2Cl$   $[M+Na]^+$  453.0474, found 453.0474.

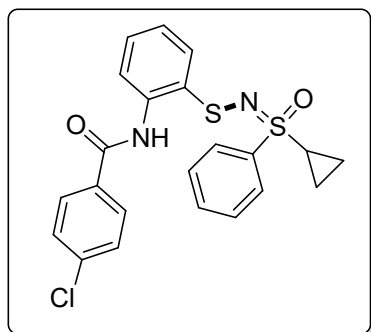

**4-Chloro-N-(2-(((cyclopropyl(oxo)(phenyl)- $\lambda^6$ -sulfaneylidene)amino)thio)phenyl)-benzamide (4e):** Following the general procedure and purification by column chromatography using petroleum ether/ethyl acetate (6:1) as eluent afforded the product as a yellow oil (28.8 mg, 65% yield).  **$^1H$  NMR** (500 MHz,  $CDCl_3$ )  $\delta$  10.17 (s, 1H), 8.47 (d,  $J = 8.3$  Hz, 1H), 8.06 (d,  $J = 8.2$  Hz, 2H), 7.72 (d,  $J = 7.9$  Hz, 2H), 7.60 (t,  $J = 7.8$  Hz, 1H), 7.45 (dd,  $J = 14.3, 7.7$  Hz, 4H), 7.35 – 7.27 (m, 2H), 6.94 (t,  $J = 7.6$  Hz, 1H), 2.56 (tt,  $J = 8.3, 4.7$  Hz, 1H), 1.58 (dq,  $J = 11.1, 5.4$  Hz, 1H), 1.19 – 1.03 (m, 2H), 0.90 (p,  $J = 7.7$  Hz, 1H).  **$^{13}C$  NMR** (126 MHz,  $CDCl_3$ )  $\delta$  163.97, 139.24, 138.07, 137.91, 133.47, 133.35, 130.71, 129.60, 129.20, 128.93, 128.77, 128.20, 128.16, 123.67, 121.03, 32.48, 6.48, 5.54. **HRMS (ESI)**  $m/z$  calcd for  $C_{22}H_{19}N_2O_2NaS_2Cl$   $[M+Na]^+$  465.0474, found 465.0477.

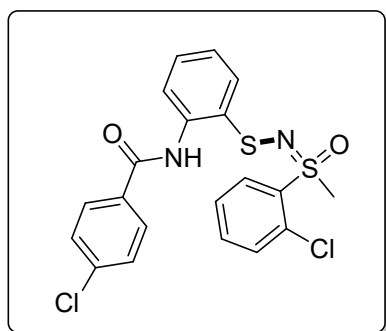

**4-Chloro-N-(2-(((2-chlorophenyl)(methyl)(oxo)- $\lambda^6$ -sulfaneylidene)amino)thio)-phenyl)benzamide (4f):** Following the general procedure and purification by column chromatography using petroleum ether/ethyl acetate (6:1) as eluent afforded the product as a white solid (29.3 mg, 65% yield). Mp: 146-148°C.  $^1\text{H NMR}$  (500 MHz, )  $\delta$  9.88 (s, 1H), 8.41 (d,  $J = 7.8$  Hz, 1H), 8.14 (d,  $J = 7.6$  Hz, 1H), 8.03 (d,  $J = 6.8$  Hz, 2H), 7.46 (dd,  $J = 21.7, 7.1$  Hz, 4H), 7.29 (t,  $J = 8.0$  Hz, 2H), 7.04 (d,  $J = 7.4$  Hz, 1H), 6.81 (t,  $J = 7.6$  Hz, 1H), 3.42 (s, 3H).  $^{13}\text{C NMR}$  (126 MHz,  $\text{CDCl}_3$ )  $\delta$  163.95, 139.78, 138.02, 135.18, 134.89, 133.43, 132.64, 132.17, 131.88, 131.28, 130.12, 128.94, 128.91, 127.47, 126.52, 123.51, 121.00, 42.10. **HRMS (ESI)**  $m/z$  calcd for  $\text{C}_{20}\text{H}_{16}\text{N}_2\text{O}_2\text{NaS}_2\text{Cl}_2$   $[\text{M}+\text{Na}]^+$  472.9928, found 472.9926.

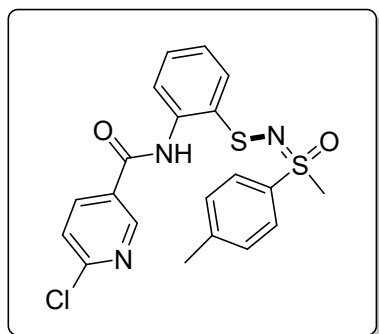

**6-Chloro-N-(2-(((methyl(oxo)(p-tolyl)- $\lambda^6$ -sulfaneylidene)amino)thio)phenyl)nicotinamide (4g):** Following the general procedure and purification by column chromatography using petroleum ether/ethyl acetate (6:1) as eluent afforded the product as a white solid (24.2 mg, 56% yield). Mp: 149-151°C.  $^1\text{H NMR}$  (500 MHz,  $\text{CDCl}_3$ )  $\delta$  10.22 (s, 1H), 9.12 (s, 1H), 8.36 (d,  $J = 41.2$  Hz, 2H), 7.72 – 7.58 (m, 2H), 7.45 – 7.41 (m, 1H), 7.33 (dd,  $J = 23.7, 5.1$  Hz, 4H), 7.00 (d,  $J = 5.1$  Hz, 1H), 3.20 (s, 3H), 2.46 (s, 3H).  $^{13}\text{C NMR}$  (126 MHz,  $\text{CDCl}_3$ )  $\delta$  162.13, 154.34, 148.82, 145.20,



138.88, 138.17, 134.60, 131.08, 130.15, 129.78, 129.62, 128.38, 128.24, 124.24, 121.42, 43.58, 21.58. **HRMS (ESI)**  $m/z$  calcd for  $C_{20}H_{18}N_3O_2NaS_2Cl$   $[M+Na]^+$  454.0427, found 454.0428.

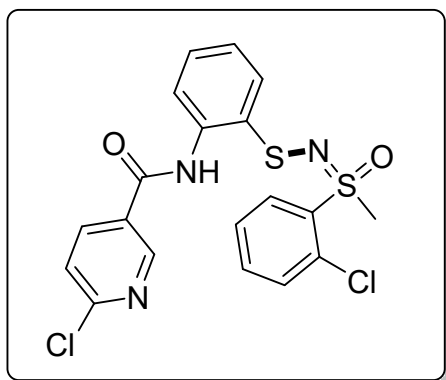

**6-Chloro-N-(2-(((2-chlorophenyl)(methyl)(oxo)- $\lambda^6$ -sulfaneylidene)amino)thio)-phenyl)nicotinamide (4h):** Following the general procedure and purification by column chromatography using petroleum ether/ethyl acetate (6:1) as eluent afforded the product as a white solid (30.4 mg, 67% yield). Mp: 134-136°C.  **$^1H$  NMR** (500 MHz,  $CDCl_3$ )  $\delta$  10.03 (s, 1H), 9.13 (s, 1H), 8.36 (t,  $J = 7.9$  Hz, 2H), 8.16 (d,  $J = 7.5$  Hz, 1H), 7.53 – 7.48 (m, 2H), 7.46 (d,  $J = 8.3$  Hz, 1H), 7.32 (t,  $J = 6.5$  Hz, 2H), 7.01 (d,  $J = 7.6$  Hz, 1H), 6.84 (t,  $J = 7.4$  Hz, 1H), 3.45 (s, 3H).  **$^{13}C$  NMR** (126 MHz,  $CDCl_3$ )  $\delta$  161.95, 154.32, 148.77, 139.25, 138.09, 134.91, 132.64, 131.94, 131.80, 130.77, 129.92, 129.52, 127.46, 126.88, 124.26, 123.87, 121.19, 42.04. **HRMS (ESI)**  $m/z$  calcd for  $C_{19}H_{15}N_3O_2NaS_2Cl_2$   $[M+Na]^+$  473.9880, found 473.9878.

## K. References

- [1] Zhu, H.; Yu, J.-T.; Cheng, J. Copper-catalyzed *N*-thioetherification of sulfoximines using disulfides. *Chem. Commun.* **2016**, *52*, 11908-11911.
- [2] Lin, Y.; Guanghui, L. U.; Liu, Y.; Zheng, Y.; Nie, R.; Guo, L.; Wu, Y. h-BN@Copper(II) nanomaterial catalyzed cross-coupling reactions between sulfoximines and *N*-(phenylthio)-succinimide under mild condition. *Catal. Commun.* **2018**, *112*, 68-73.
- [3] Yang, L.; Feng, J.; Qiao, M.; Zeng, Q. Synthesis of *N*-sulfenyl-sulfoximines and -sulfenamides through a metal-free N–H/S–H dehydrocoupling reaction. *Org. Chem. Front.* **2018**, *5*, 24-28.
- [4] Kong, D.; Ma, D.; Wu, P.; Bolm, C. Mechanochemical Solvent-Free *N*-Sulfenylations of Sulfoximines and Sulfonimidamides. *ACS Sustainable Chem. Eng.* **2022**, *10*, 2863-2867.
- [5] Kang, X.; Wang, H.; Zeng, Q. Odorless, Transition-Metal-Free *N*-Sulfenylation of Sulfoximines with Thiosulfonates under Mild Conditions. *Eur. J. Org. Chem.* **2022**, *2022*, e202201229.
- [6] Uesato, S.; Matsuura, Y.; Matsue, S.; Sumiyoshi, T.; Hirata, Y.; Takemoto, S.; Kawaratani, Y.; Yamai, Y.; Ishida, K.; Sasaki, T.; et al. Discovery of new low-molecular-weight p53-Mdmx disruptors and their anti-cancer activities. *Bioorg. Med. Chem.* **2016**, *24*, 1919-1926.
- [7] Zupanc, A.; Jereb, M. One-Pot Synthesis of *N*-Iodo Sulfoximines from Sulfides. *J. Org. Chem.* **2021**, *86*, 5991-6000.

- [8] Shah, S. T. A.; Khan, K. M.; Fecker, M.; Voelter, W. A novel method for the syntheses of symmetrical disulfides using CsF–Celite as a solid base. *Tetrahedron Lett.* **2003**, *44*, 6789-6791.
- [9] Demir, A. S.; Cigdem Igdır, A.; Mahasneh, A. S. Novel conversion of thiols into disulfides, via S-nitrosothiol intermediates using trichloronitromethane. *Tetrahedron.* **1999**, *55*, 12399-12404.
- [10] Parida, A.; Choudhuri, K.; Mal, P. Unsymmetrical Disulfides Synthesis via Sulfenium Ion. *Chemistry – An Asian Journal.* **2019**, *14*, 2579-2583.

## L. Copies of $^1\text{H}$ and $^{13}\text{C}$ NMR Spectra

### Diphenyl[(phenylthio)imino]- $\lambda^6$ -sulfanone (3aa)

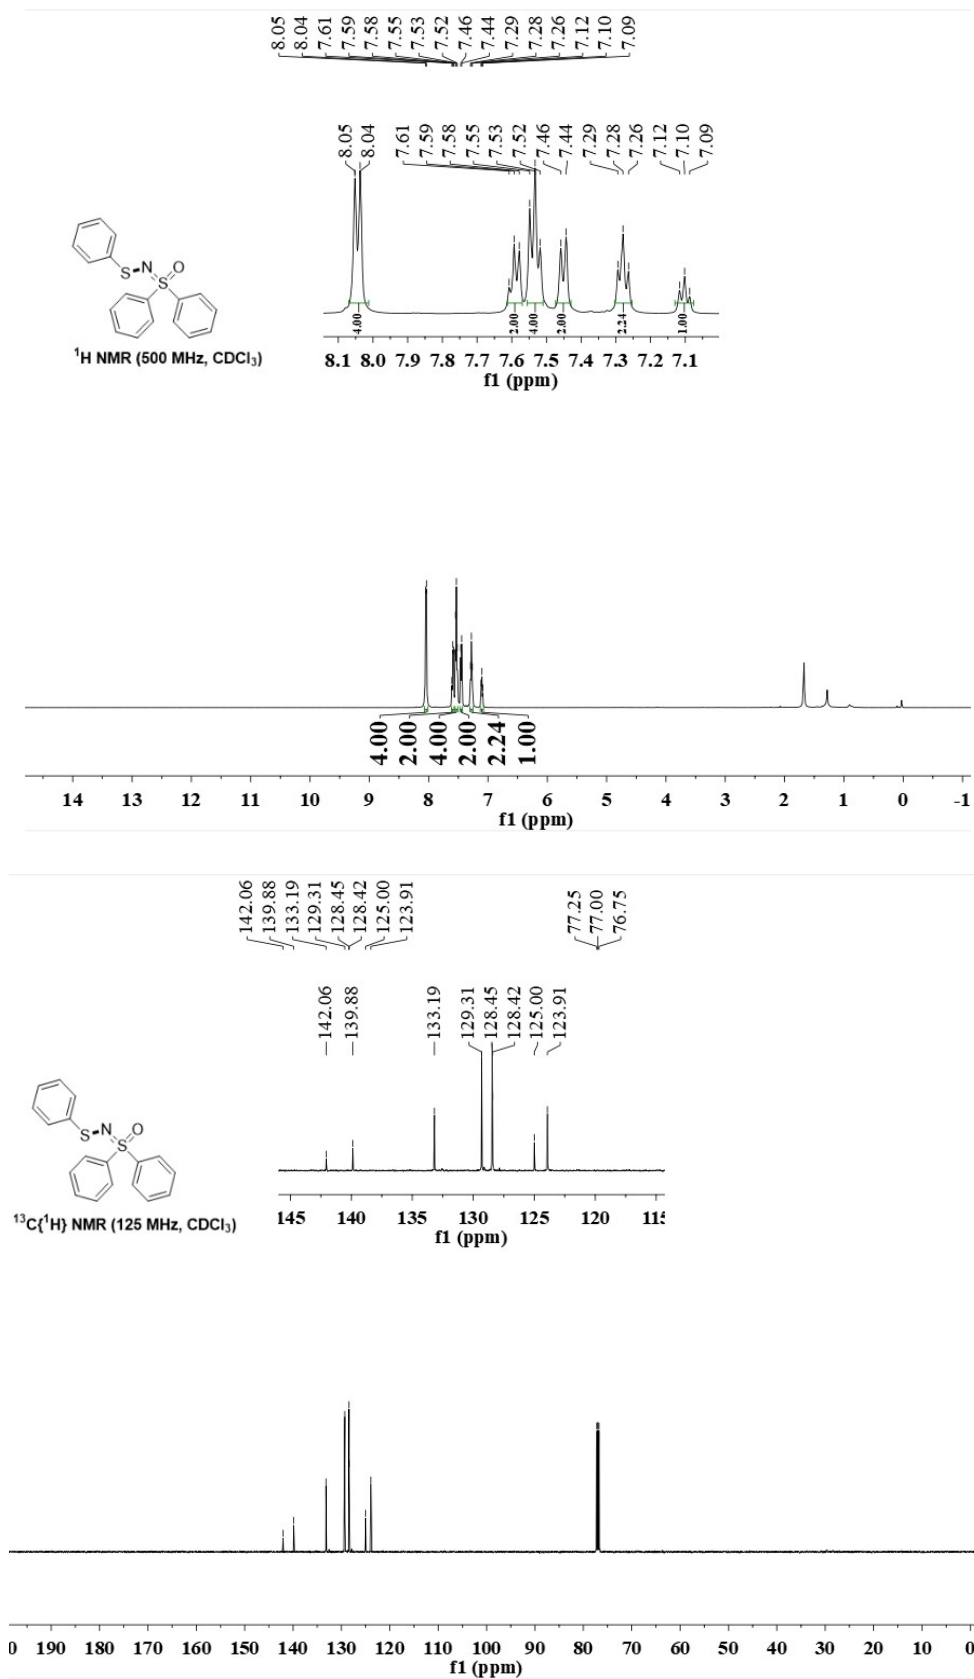

(4-Methoxyphenyl)(phenyl)((phenylthio)imino)-λ<sup>6</sup>-sulfanone (3ba)

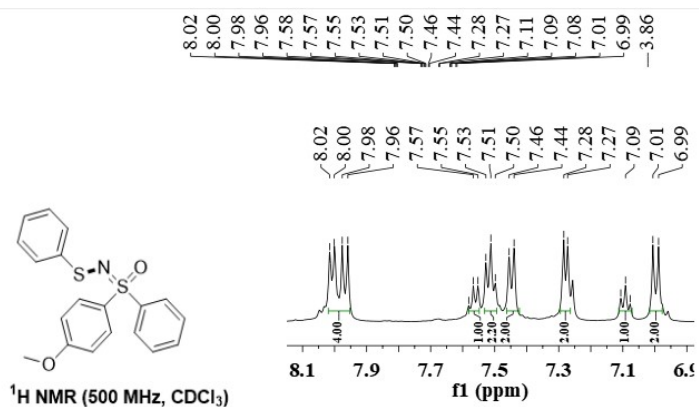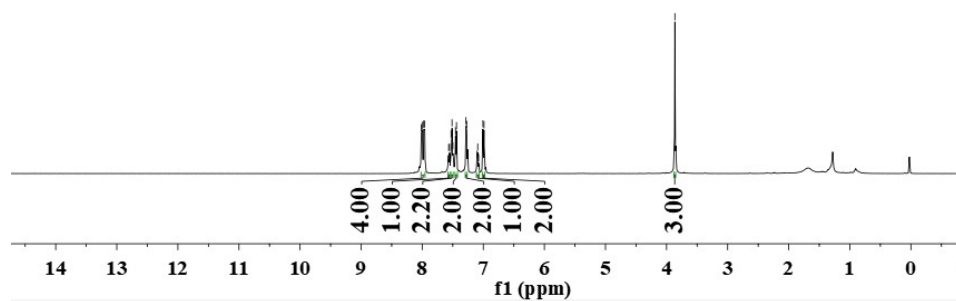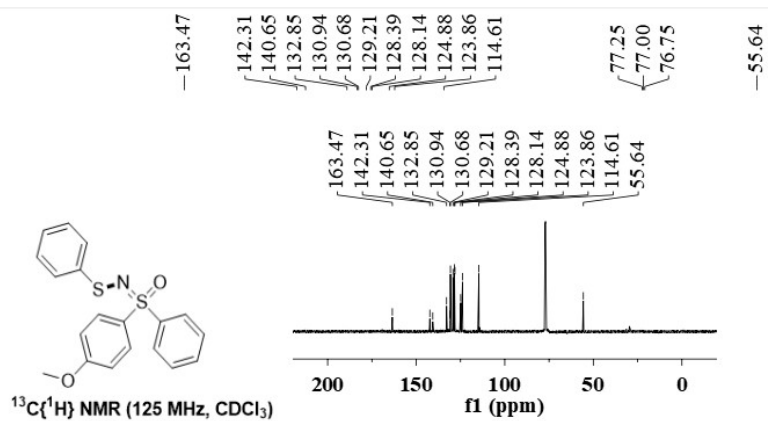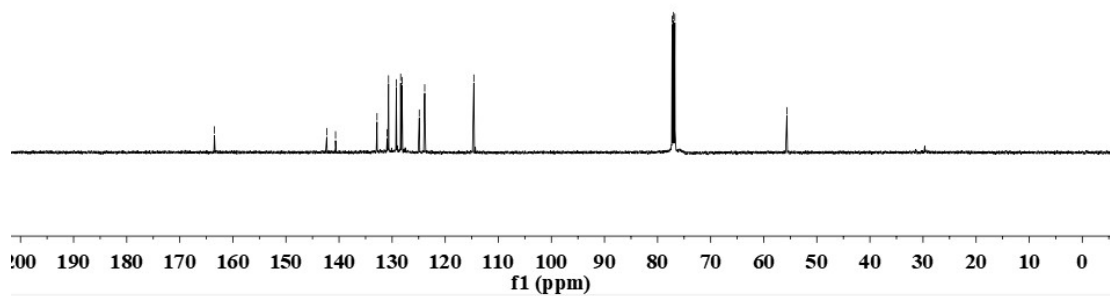

**(4-Nitrophenyl)(phenyl)((phenylthio)imino)- $\lambda^6$ -sulfanone (3ca)**

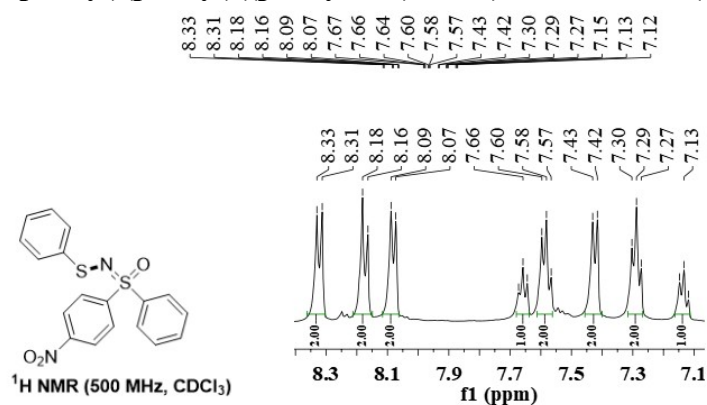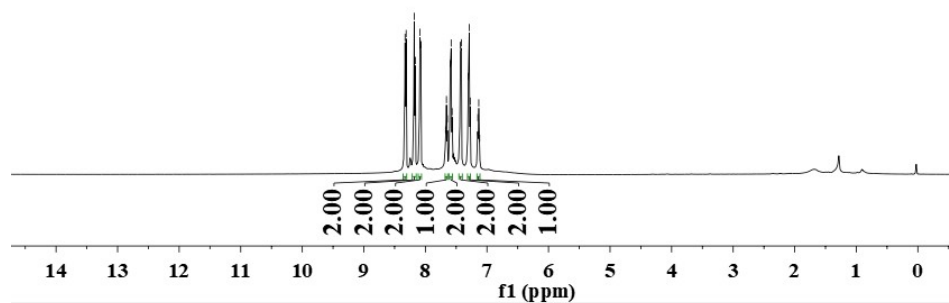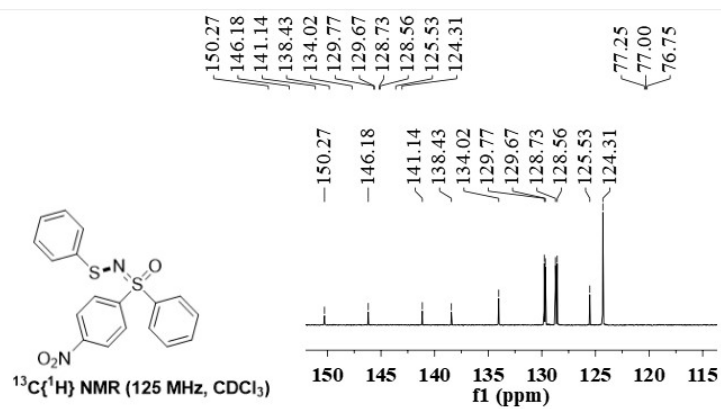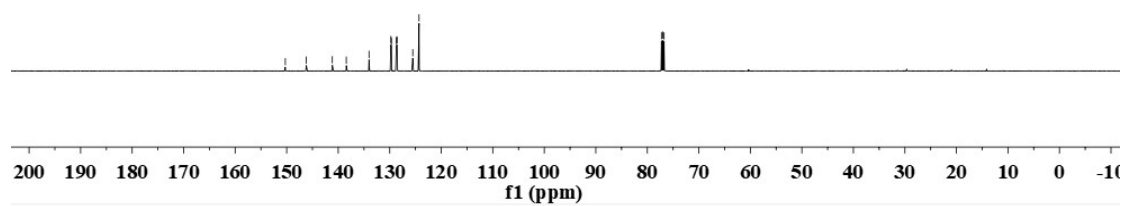

**(2-Nitrophenyl)(phenyl)((phenylthio)imino)- $\lambda^6$ -sulfanone (3da)**

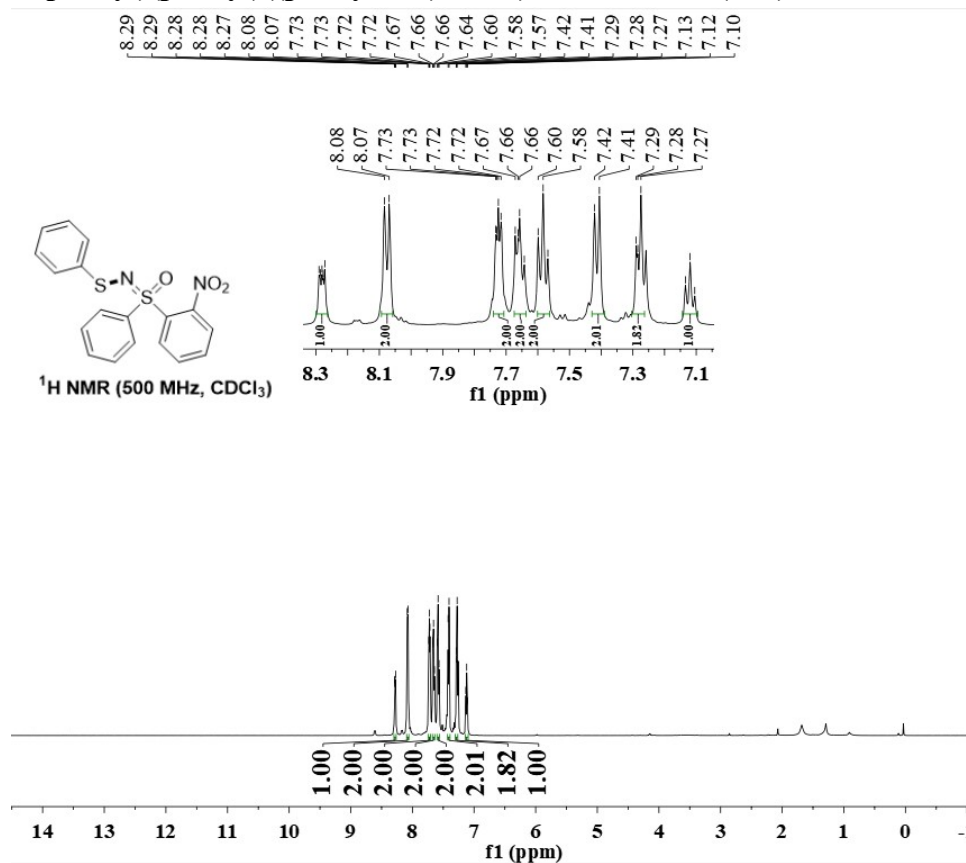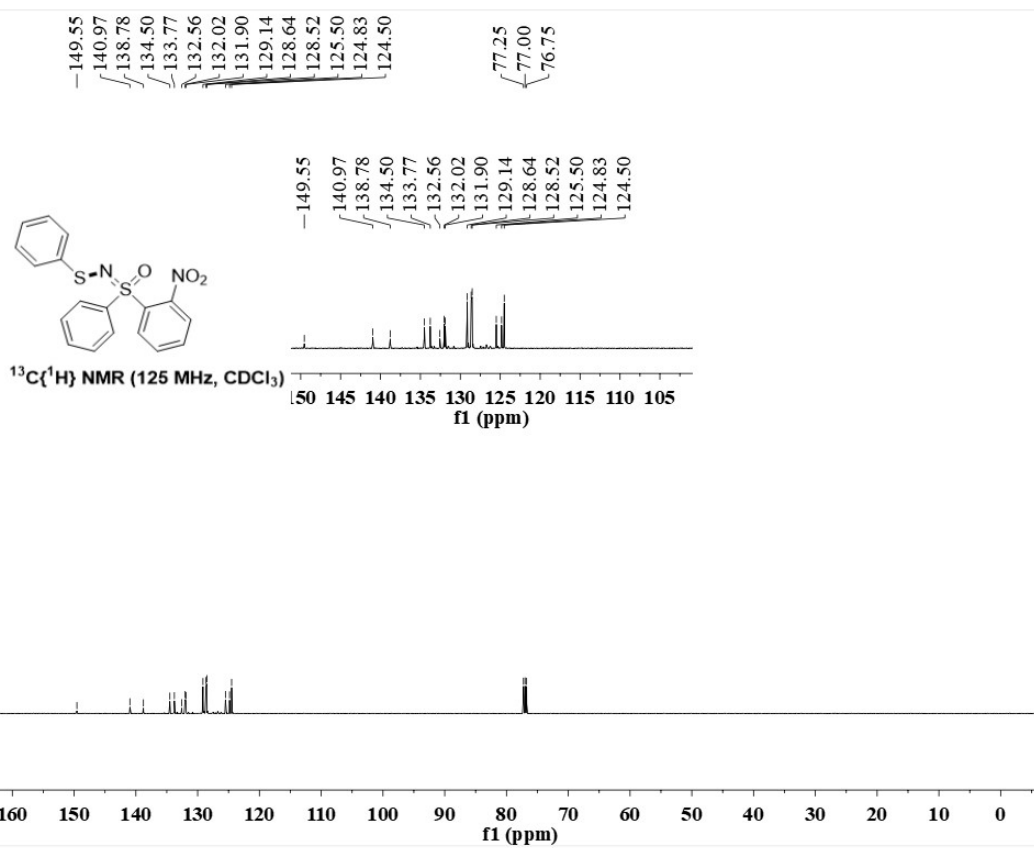

**(4-Bromophenyl)((phenylthio)imino)(p-tolyl)- $\lambda^6$ -sulfanone (3ea)**

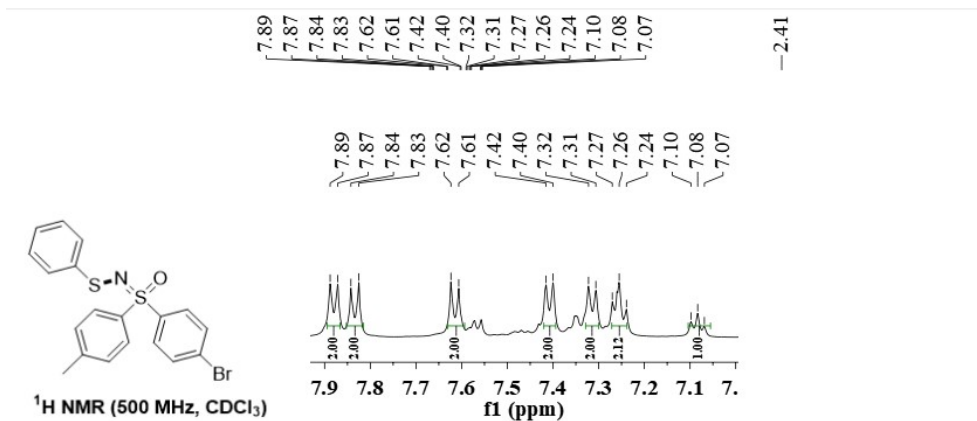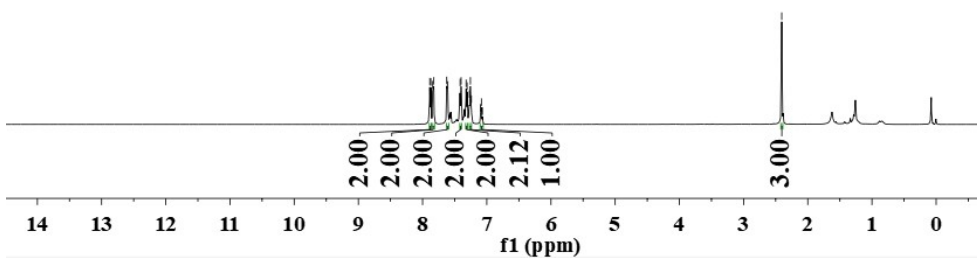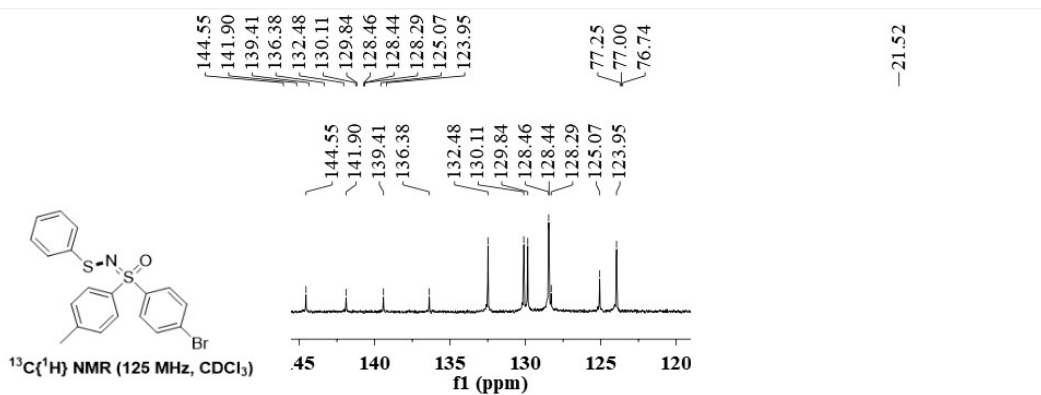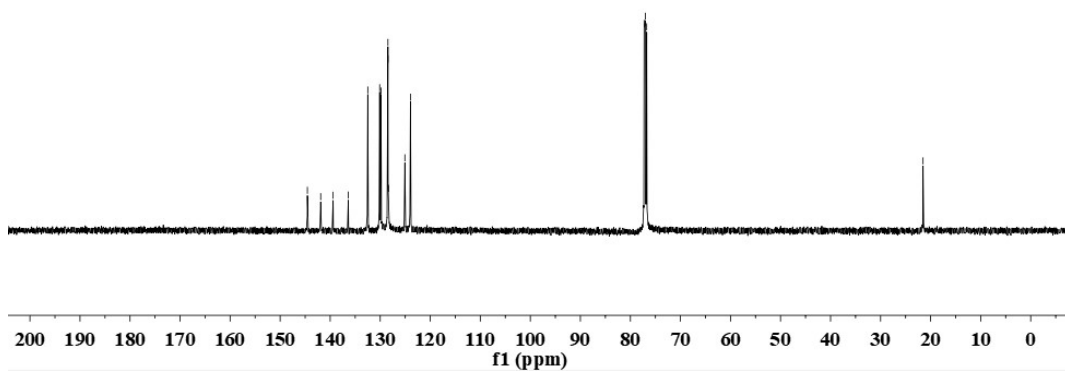

**((Phenylthio)imino)di-p-tolyl- $\lambda^6$ -sulfanone (3fa)**



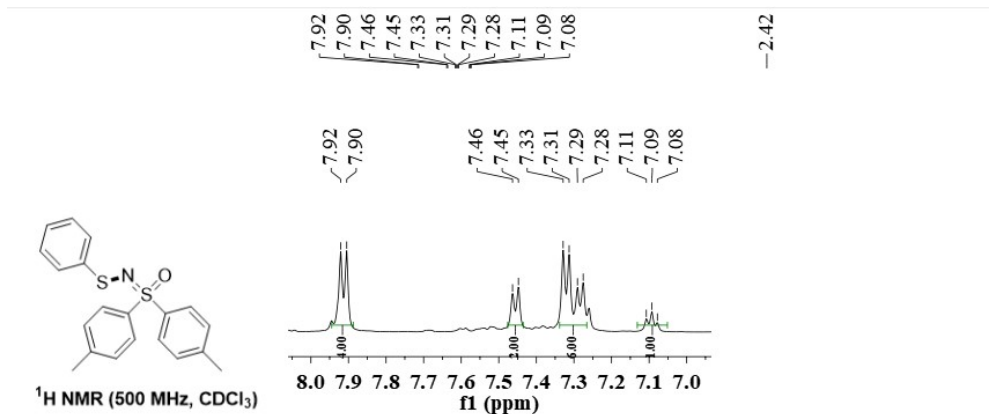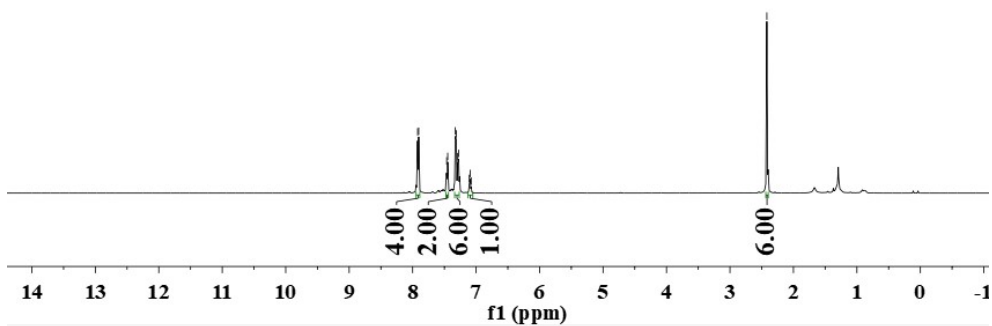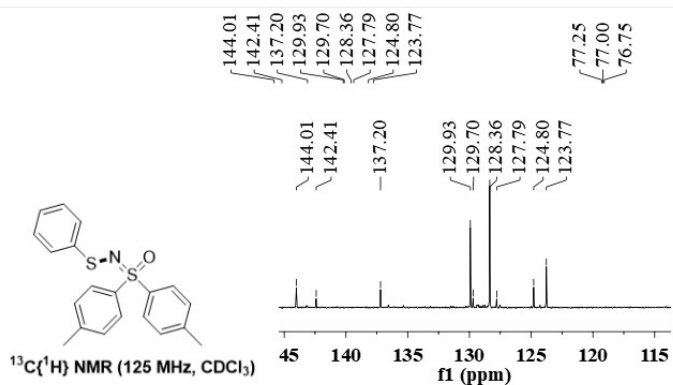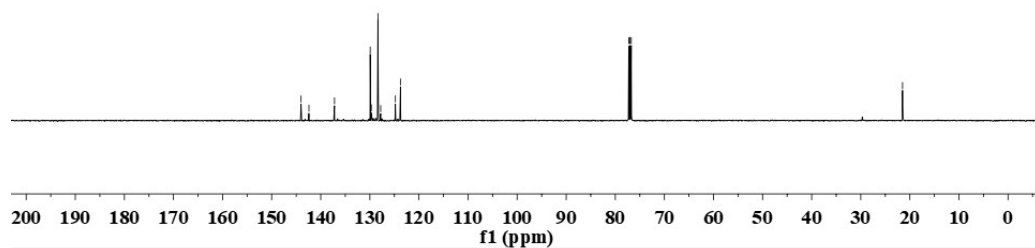

# Bis(4-chlorophenyl)((phenylthio)imino)-λ<sup>6</sup>-sulfanone(3ga)

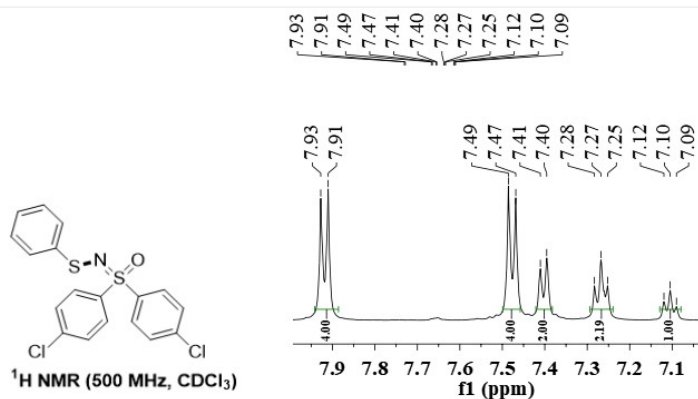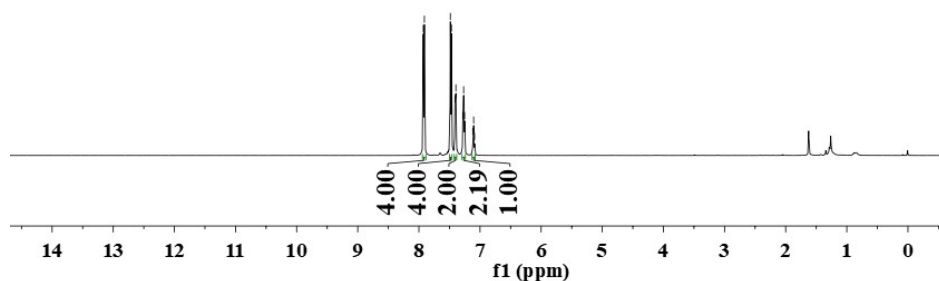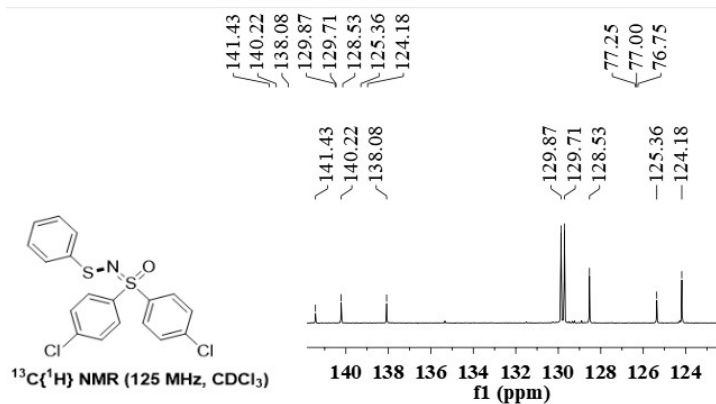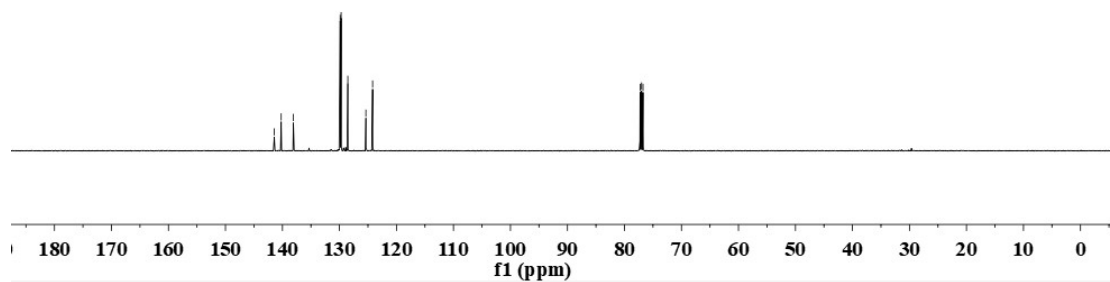

Methyl(phenyl)[(phenylthio)imino]- $\lambda^6$ -sulfanone (3ha)

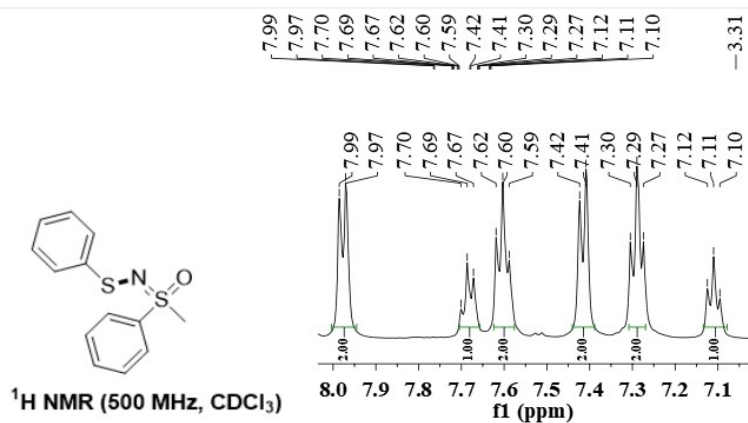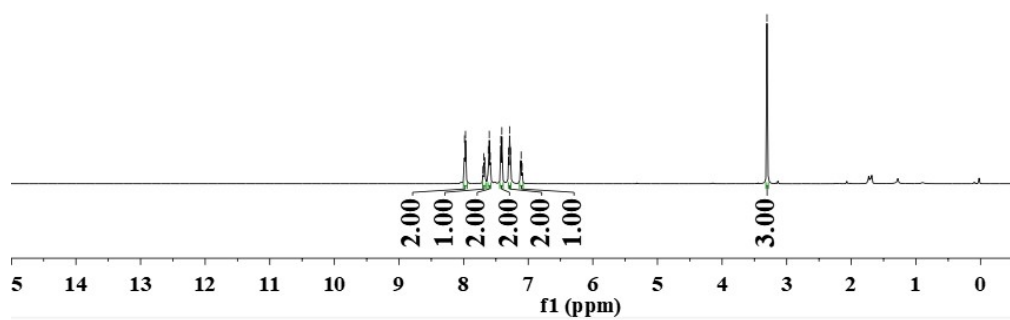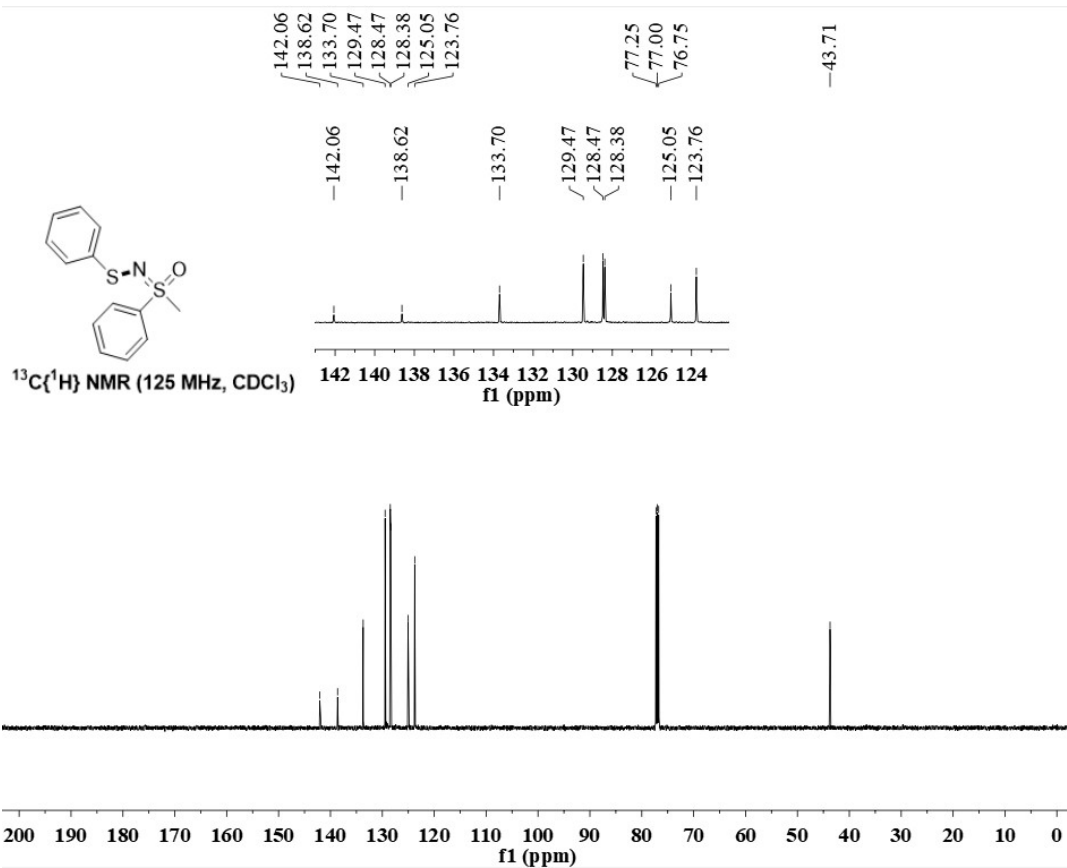

**(4-Chlorophenyl)(methyl)[(phenylthio)imino]- $\lambda^6$ -sulfanone (3ia)**

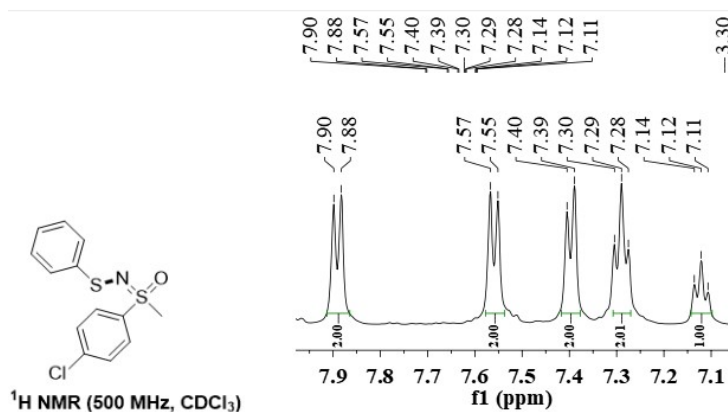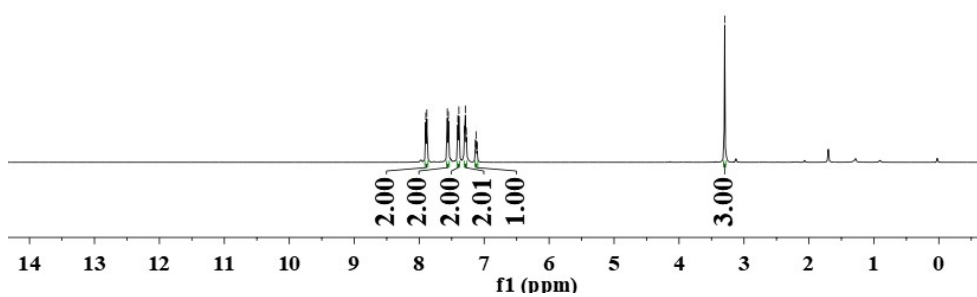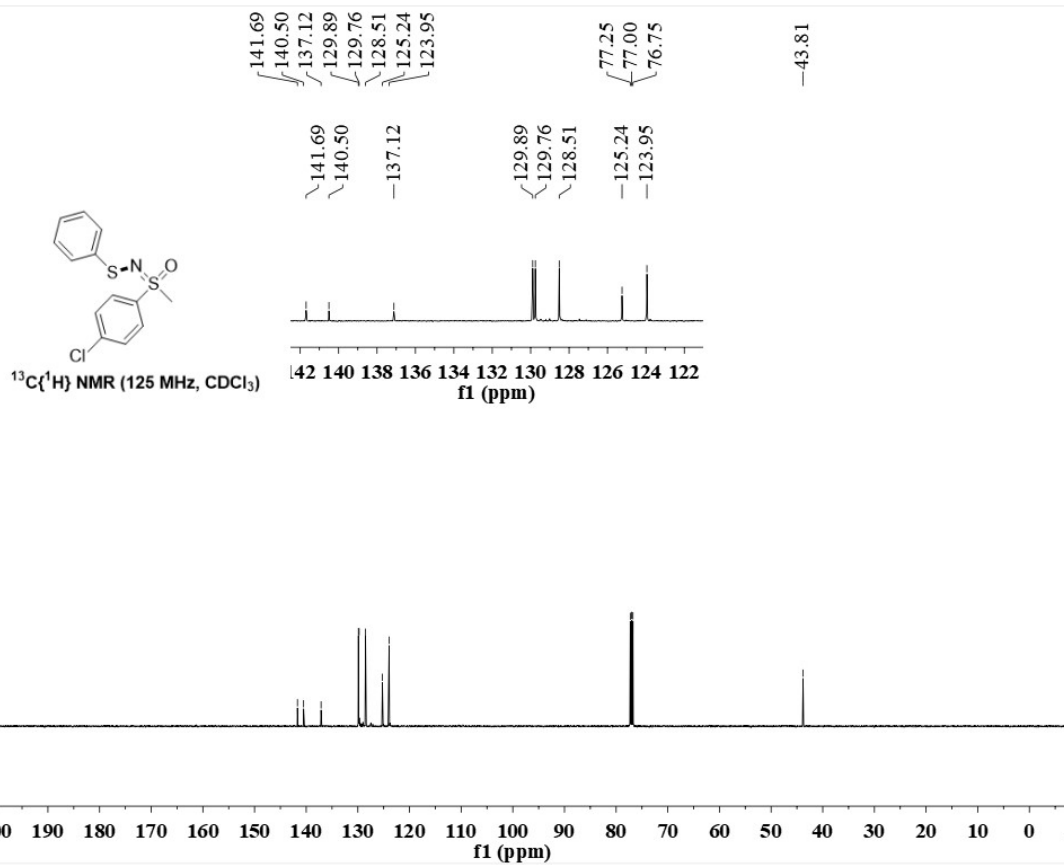

Methyl(4-nitrophenyl)[(phenylthio)imino]- $\lambda^6$ -sulfanone (3ja)

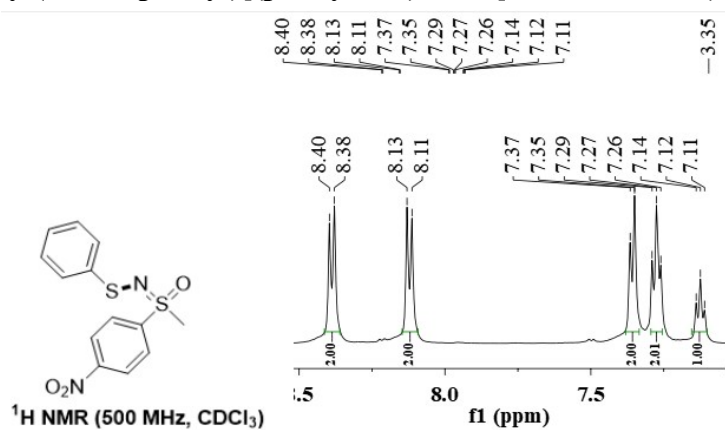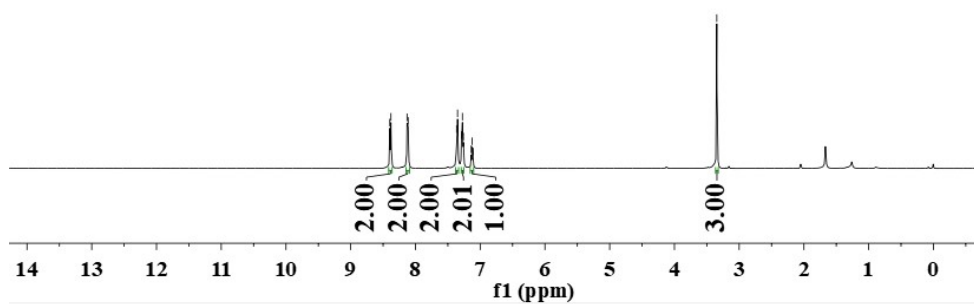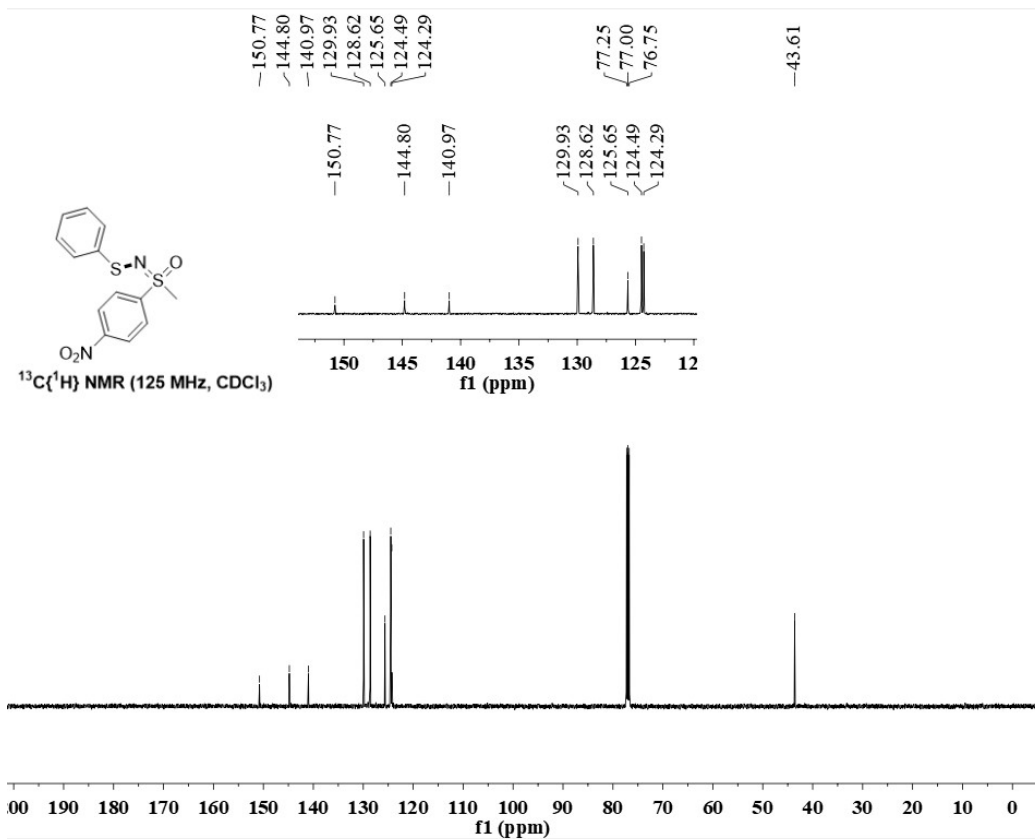

(4-Bromophenyl)(methyl)[(phenylthio)imino]- $\lambda^6$ -sulfanone (3ka)

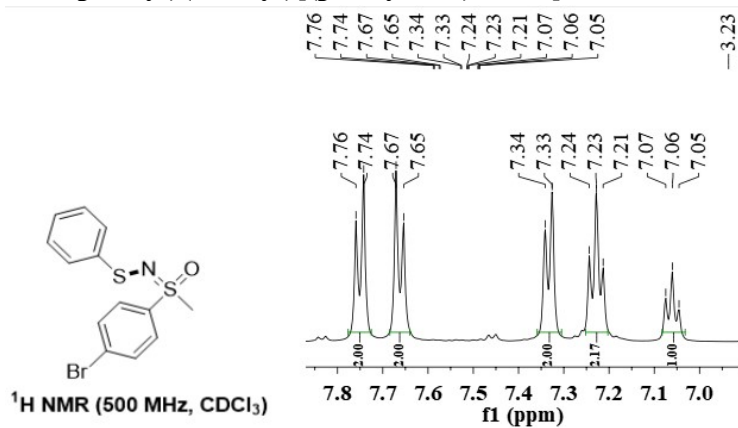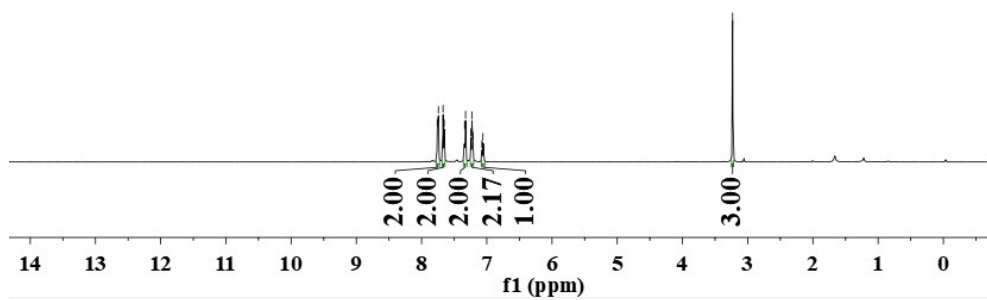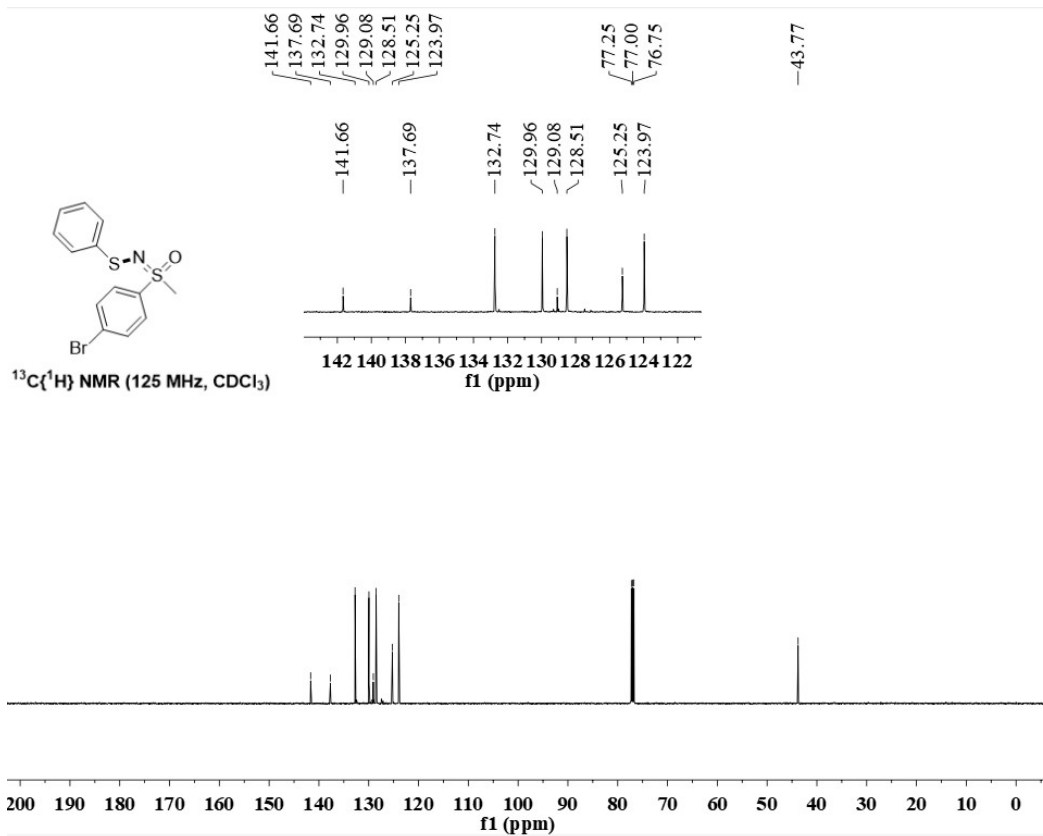

# Methyl[(phenylthio)imino](*p*-tolyl)- $\lambda^6$ -sulfanone (3la)

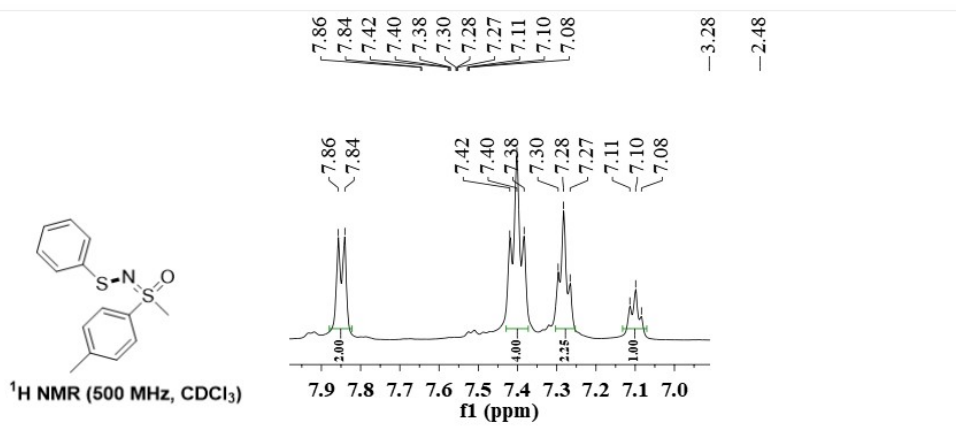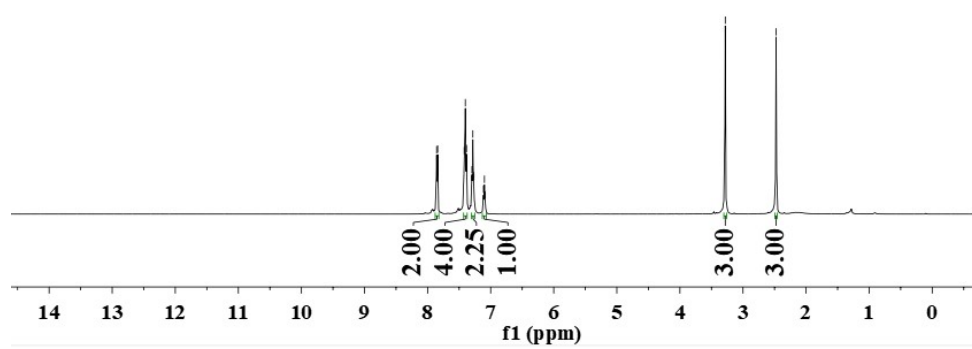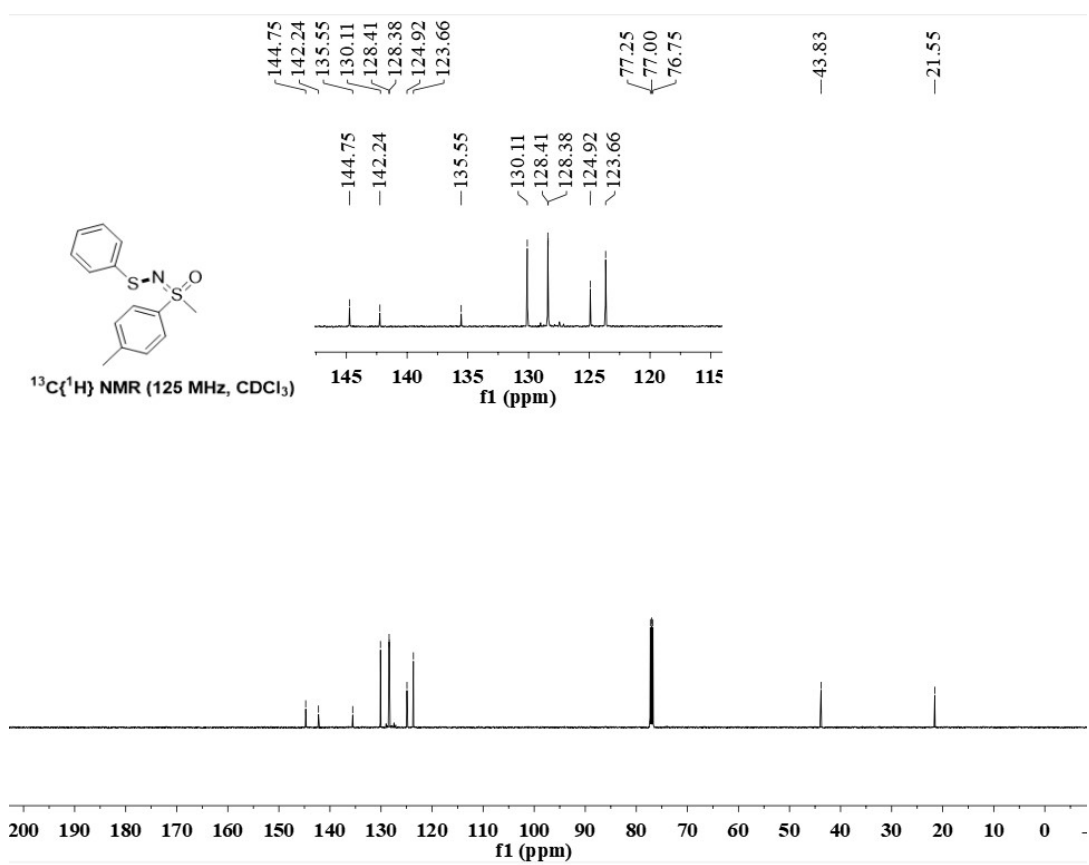

(4-Methoxyphenyl)(methyl)[(phenylthio)imino]- $\lambda^6$ -sulfanone (3ma)

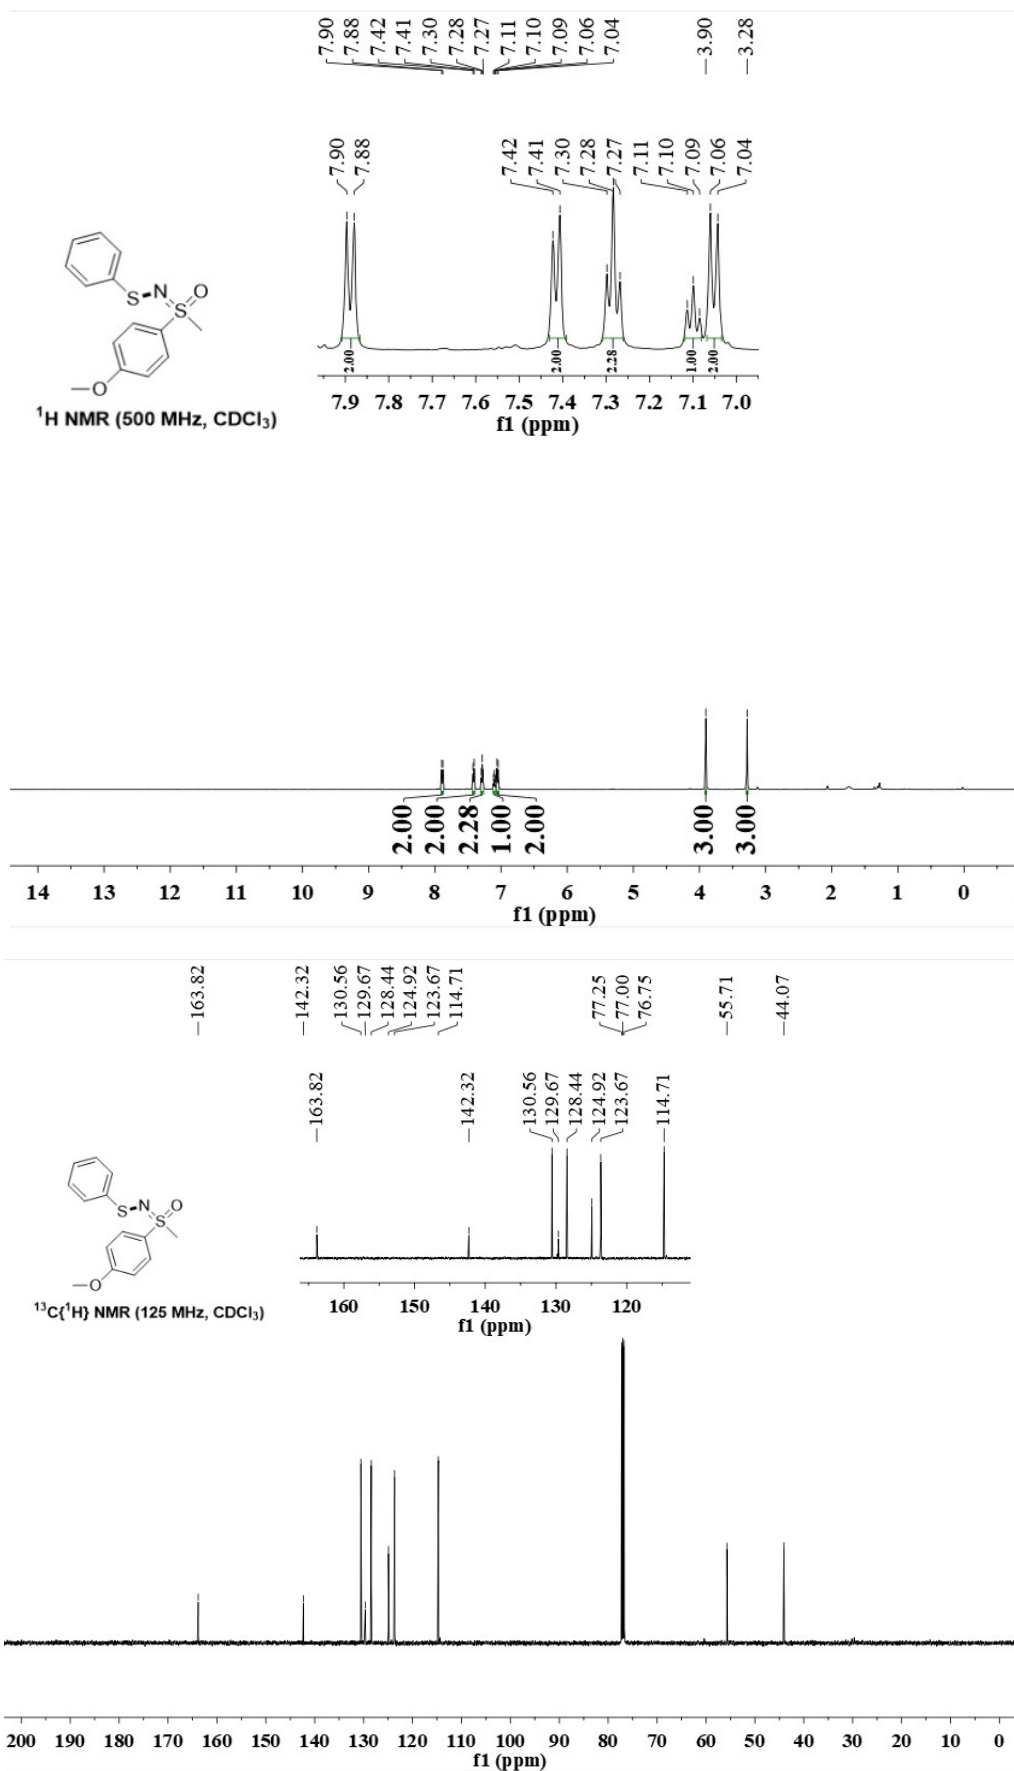



**(2-Chlorophenyl)(methyl)((phenylthio)imino)- $\lambda^6$ -sulfanone (3a)**

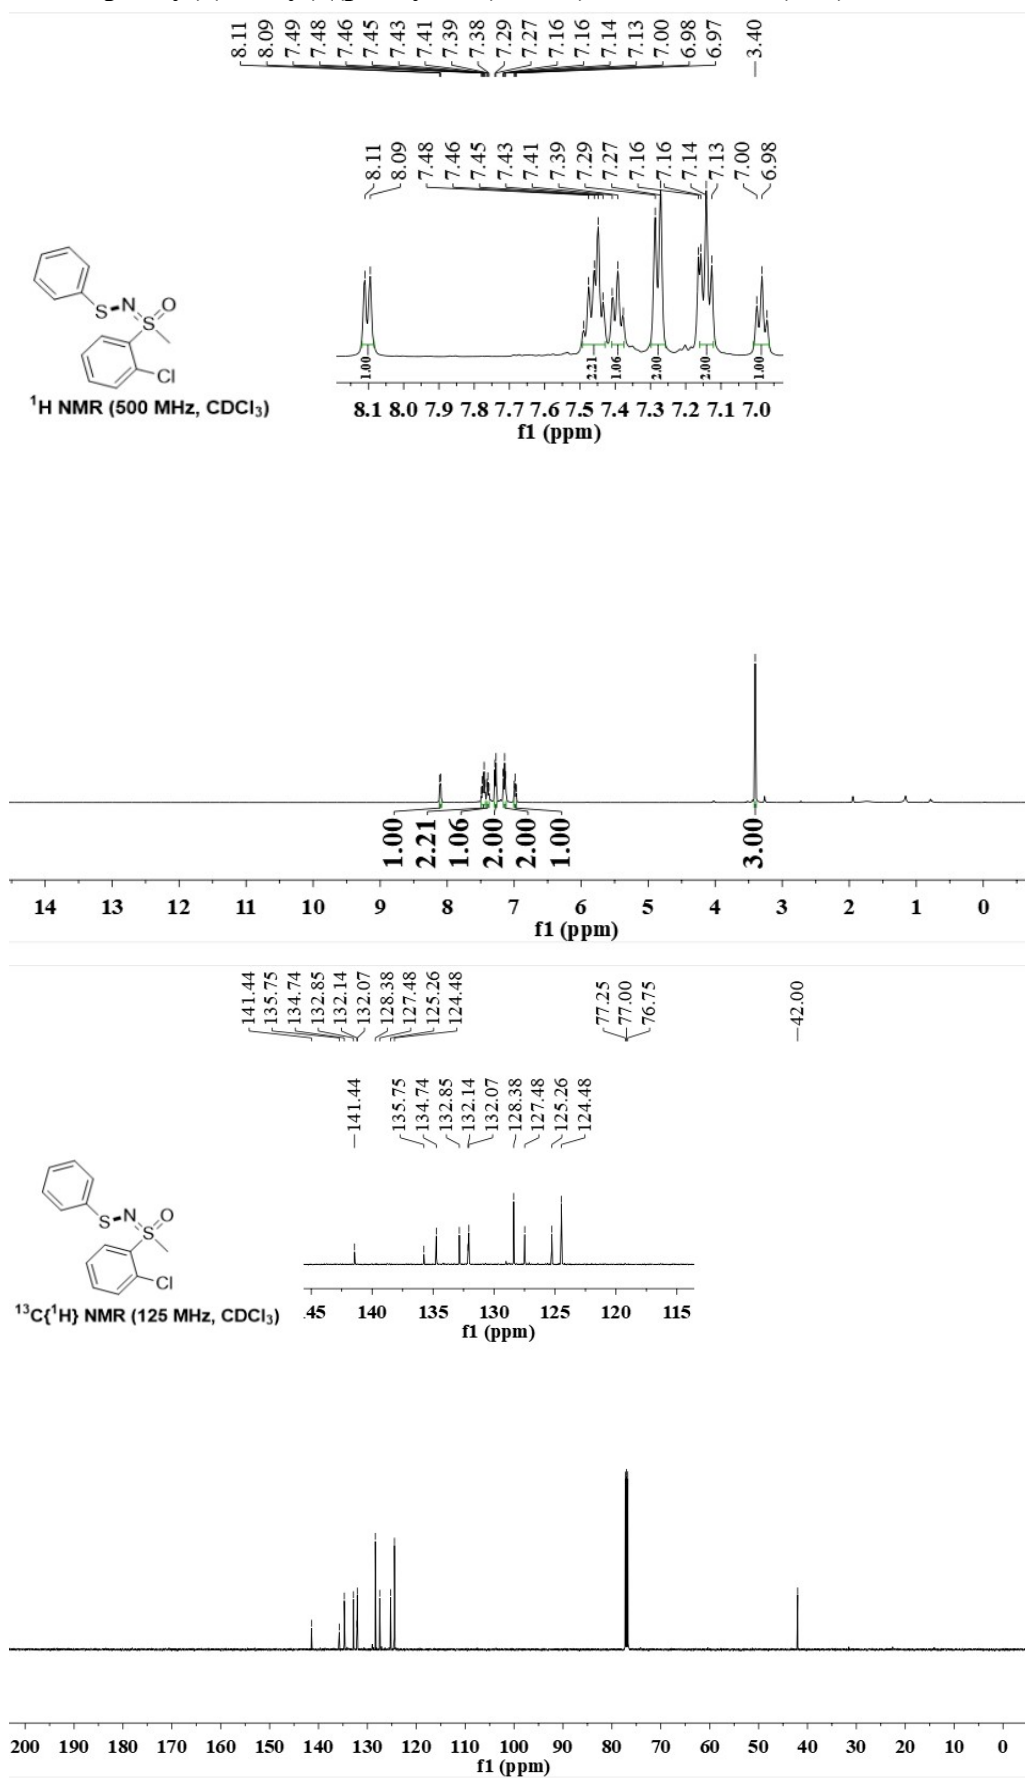

(2-Bromophenyl)(methyl)((phenylthio)imino)- $\lambda^6$ -sulfanone(3oa)

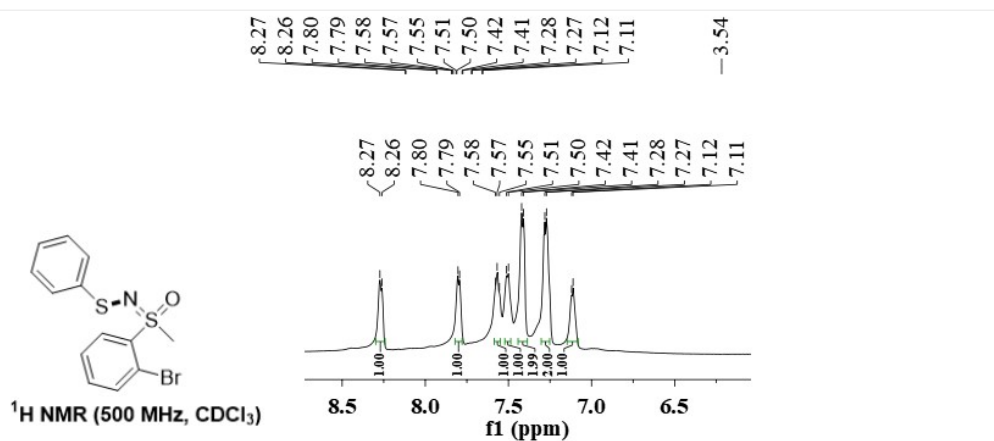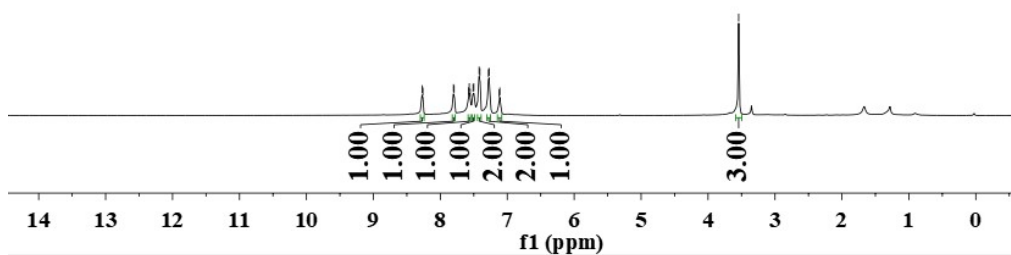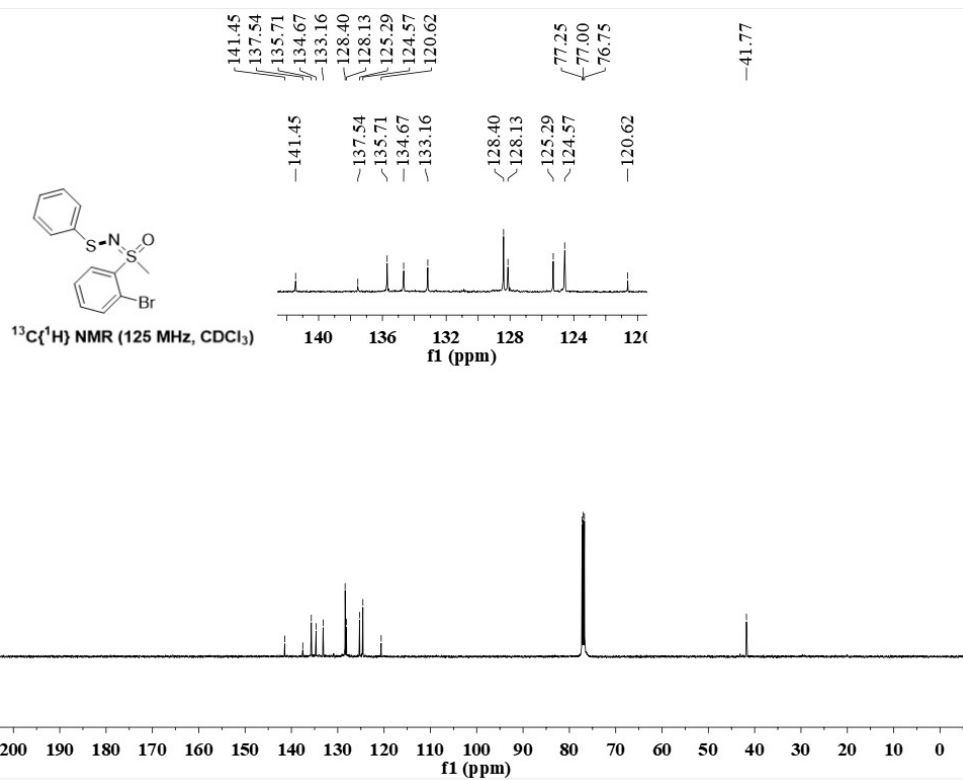

(3-Methoxyphenyl)(methyl)((phenylthio)imino)- $\lambda^6$ -sulfanone (3pa)

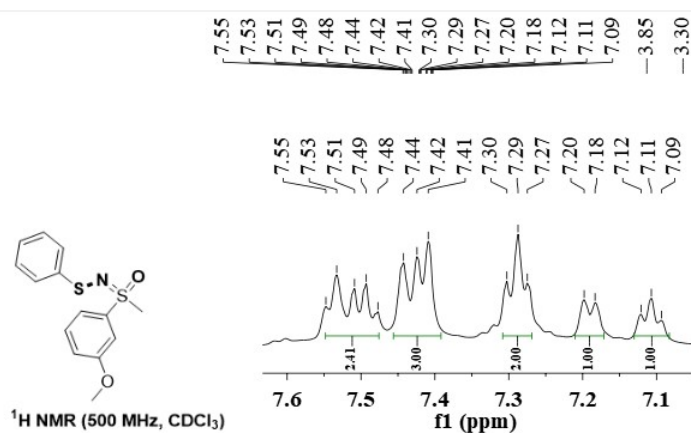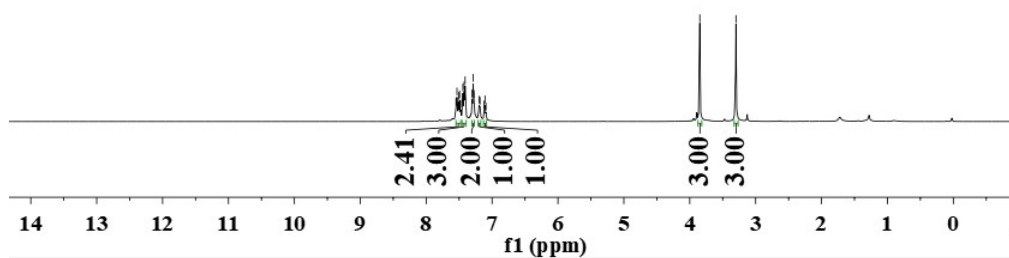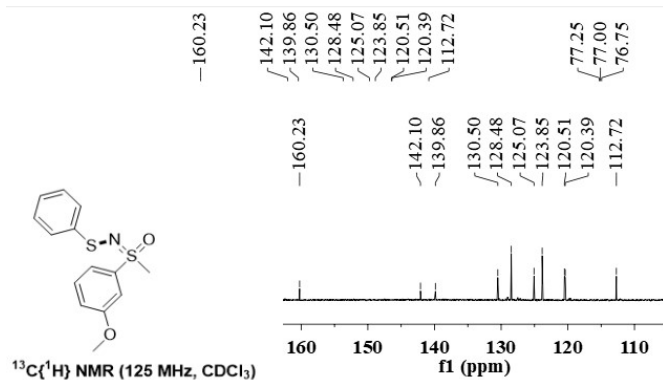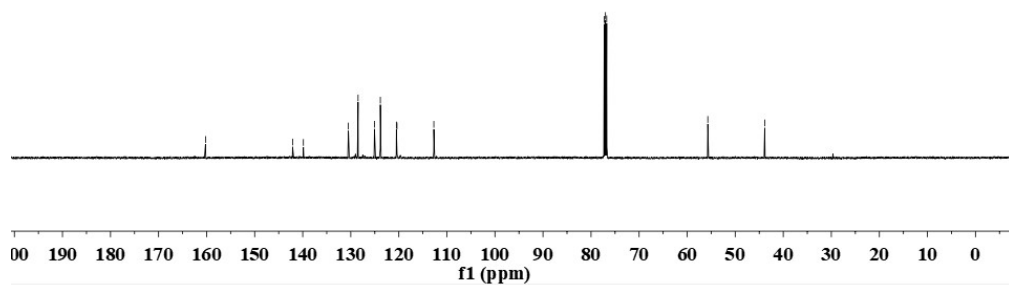

**(3-Chlorophenyl)(methyl)[(phenylthio)imino]- $\lambda^6$ -sulfanone (3qa)**

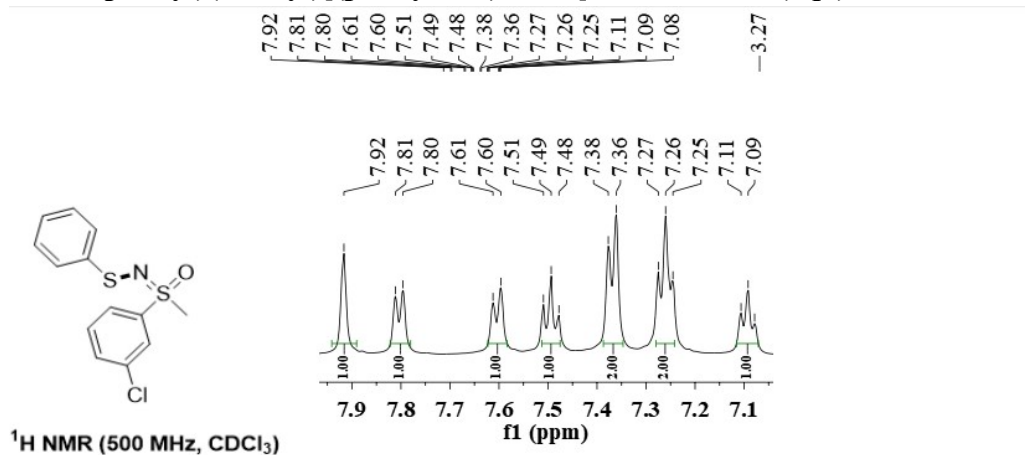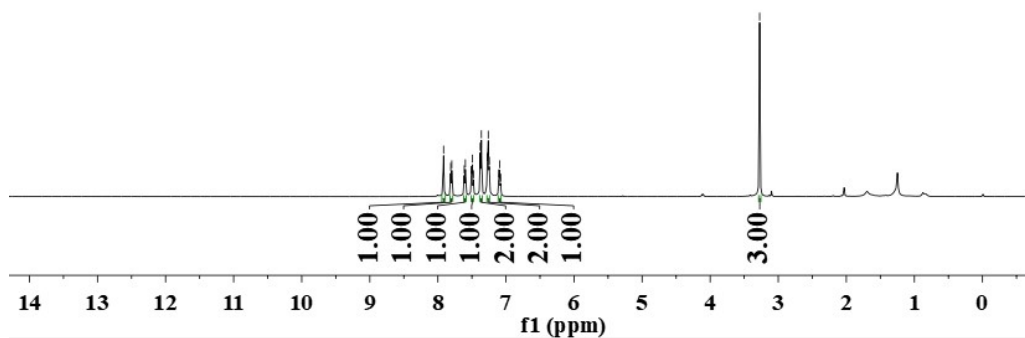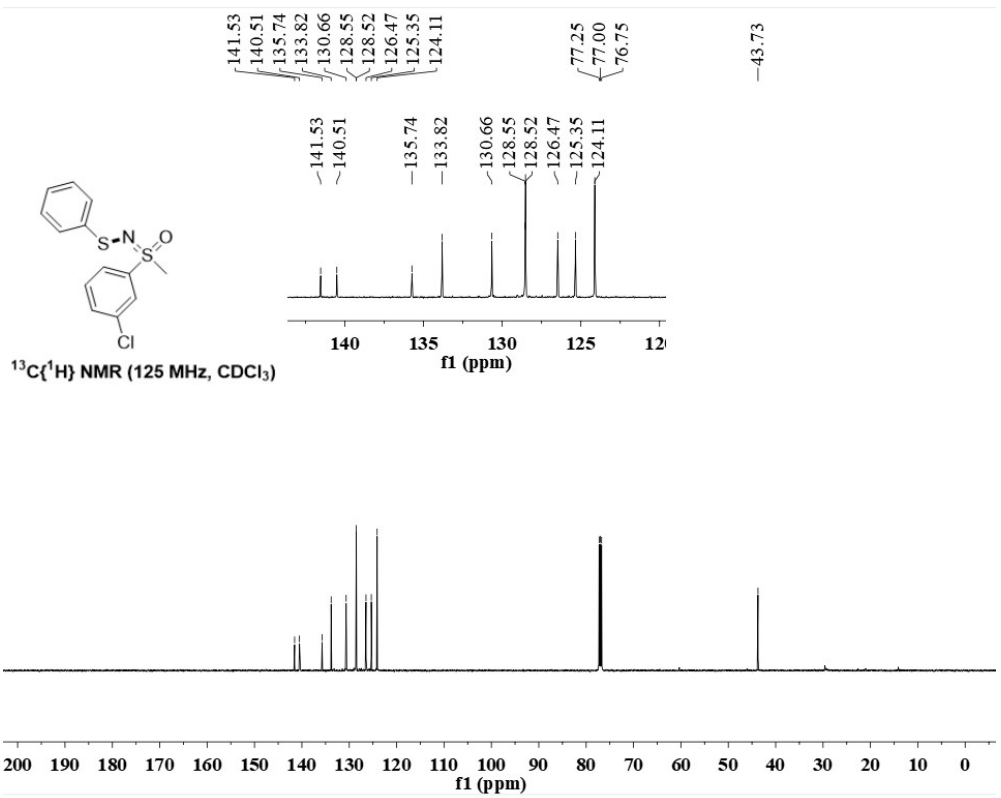

**(3-Bromophenyl)(methyl)((phenylthio)imino)- $\lambda^6$ -sulfanone (3ra)**

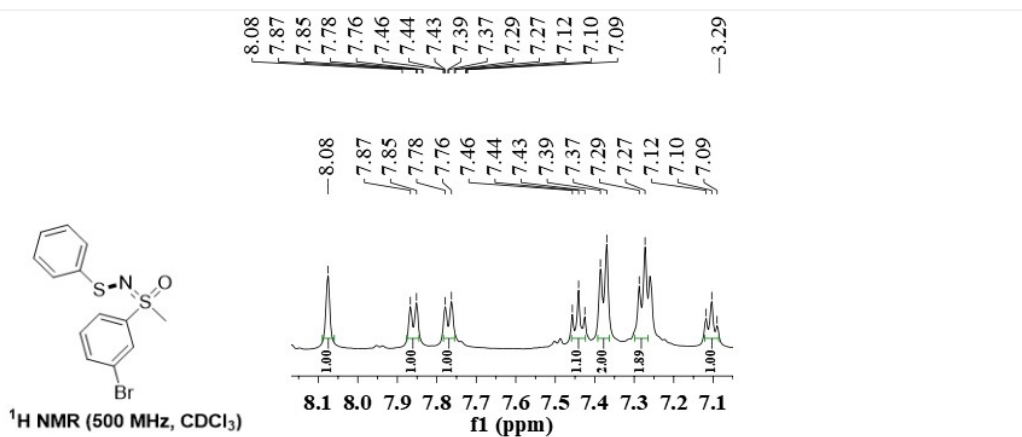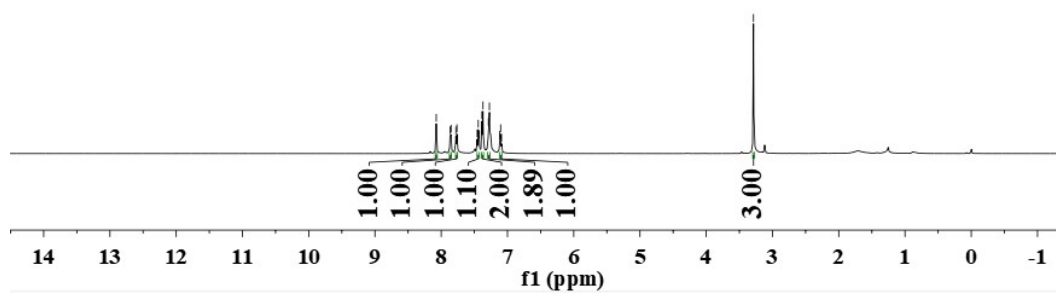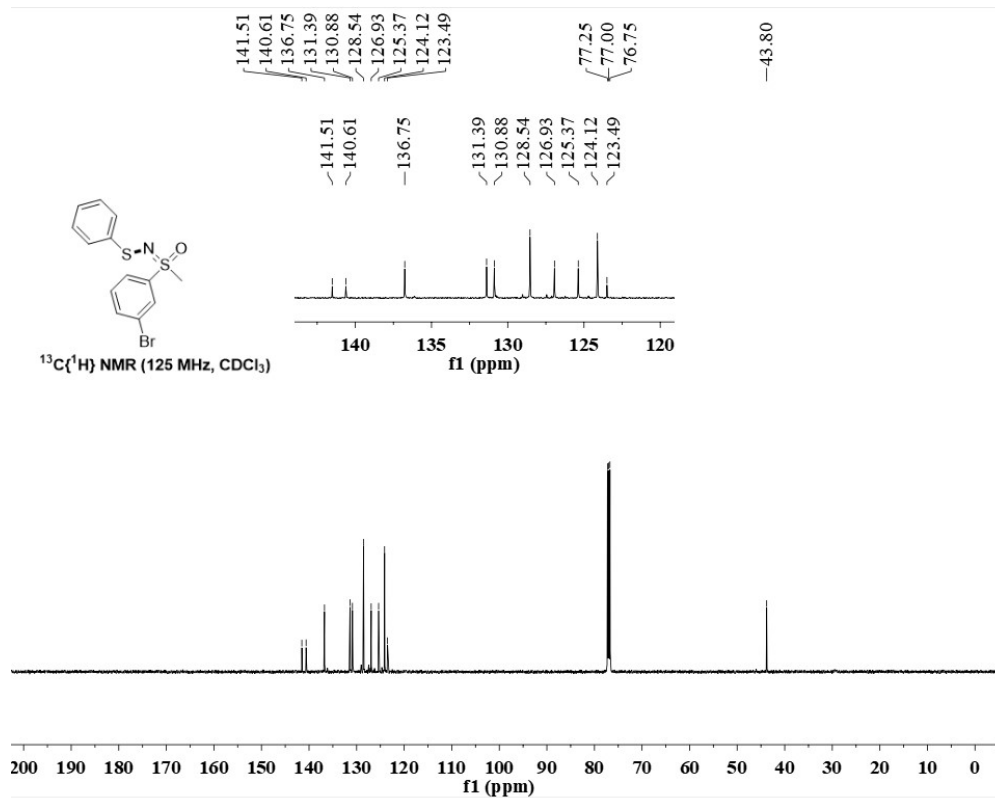

Methyl((phenylthio)imino)(3-(trifluoromethyl)phenyl)-λ<sup>6</sup>-sulfanone

(3sa)

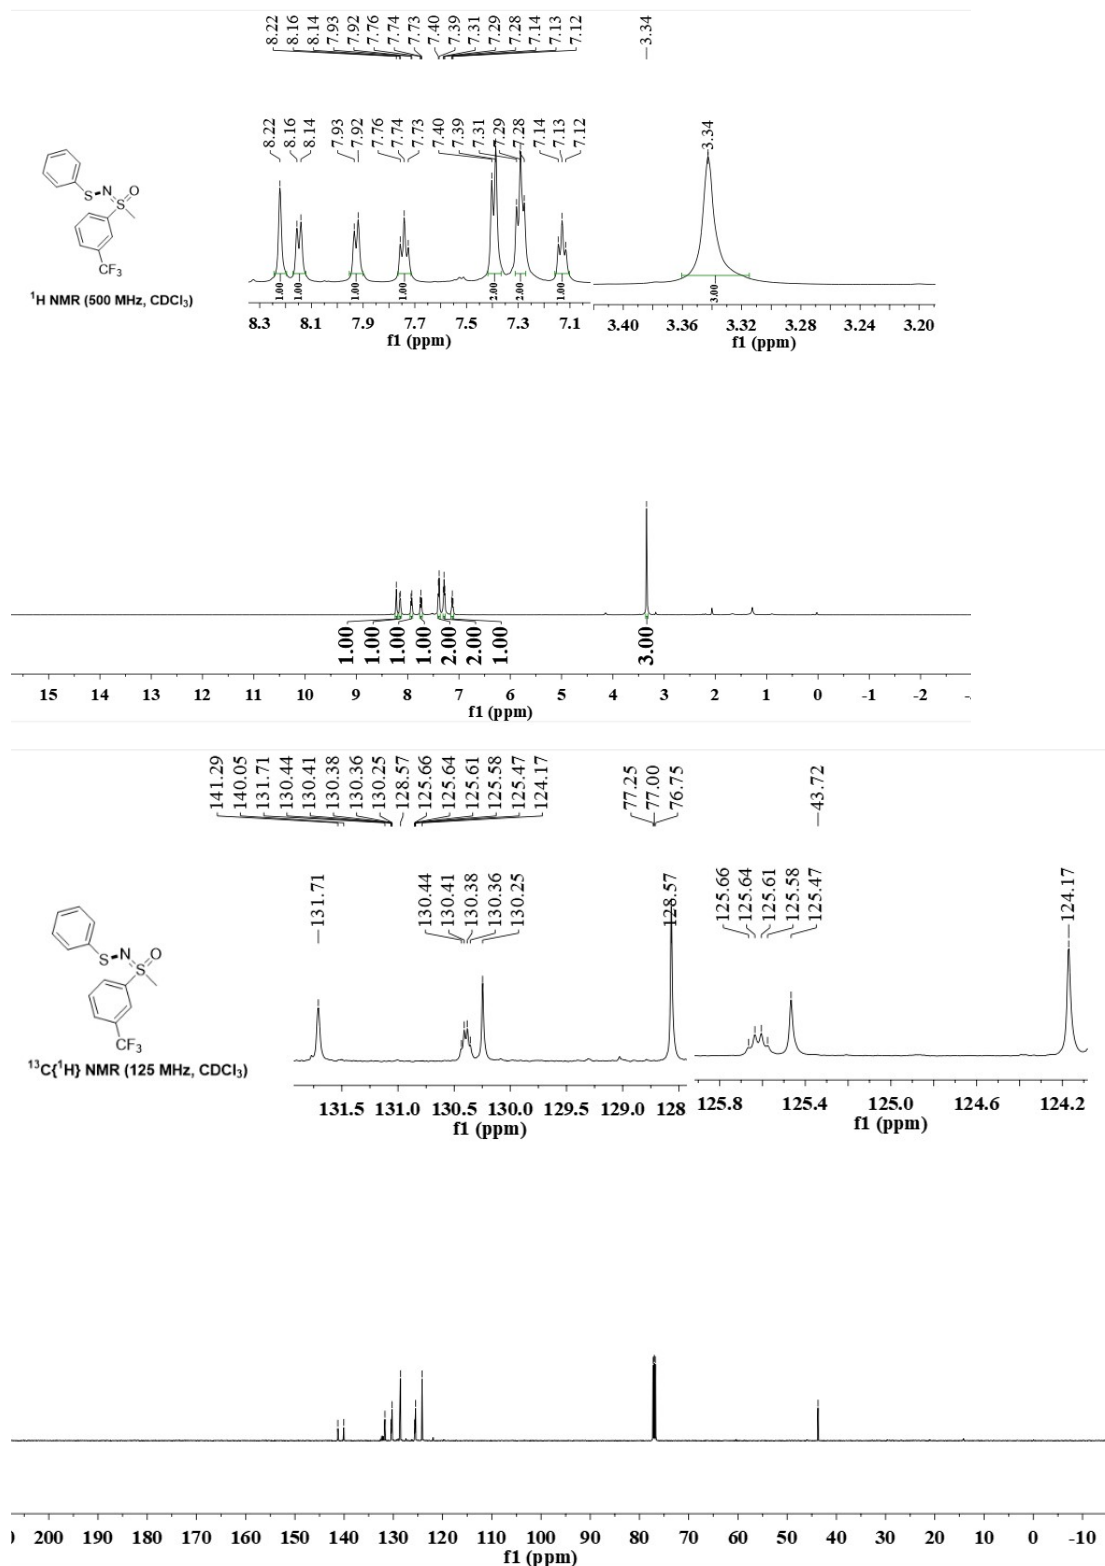

-62.75

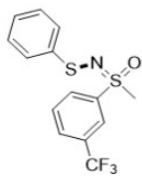

<sup>19</sup>F NMR (471 MHz, CDCl<sub>3</sub>) .

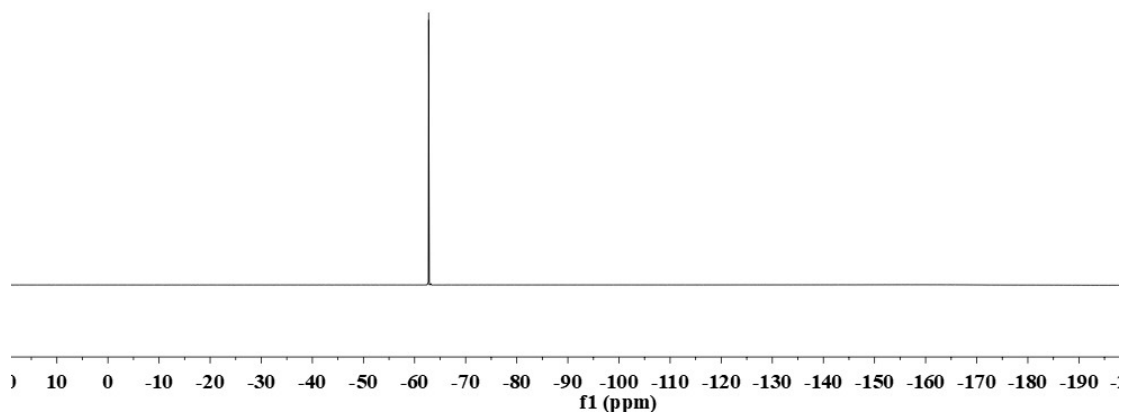

### Ethyl(phenyl)((phenylthio)imino)- $\lambda^6$ -sulfanone (3ta)

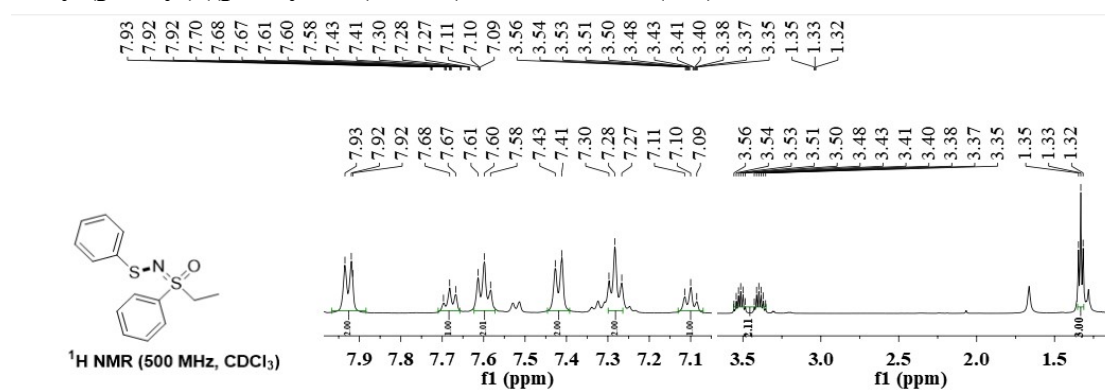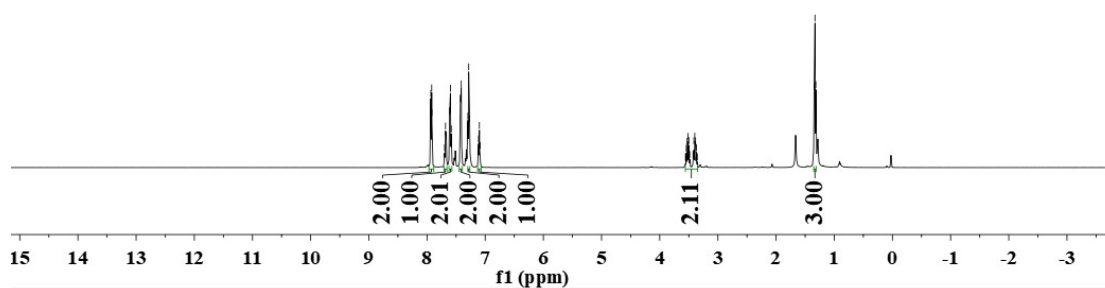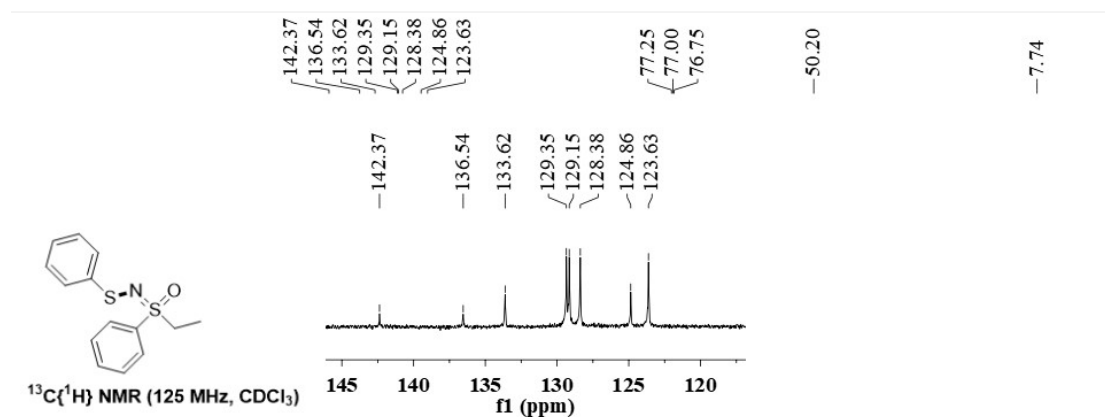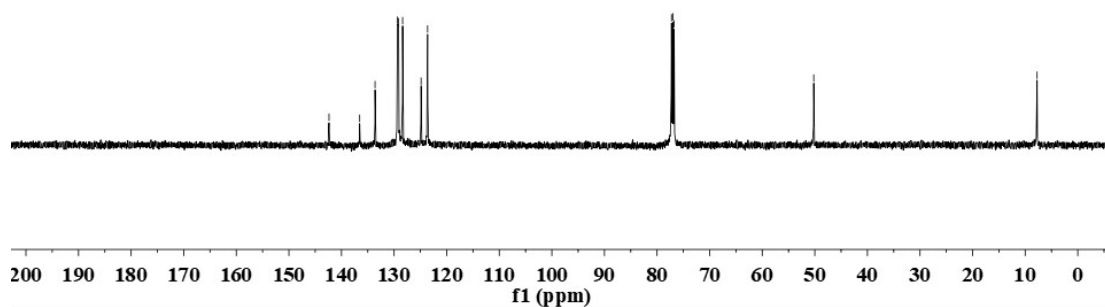



**Cyclopropyl(phenyl)((phenylthio)imino)- $\lambda^6$ -sulfanone (3ua)**

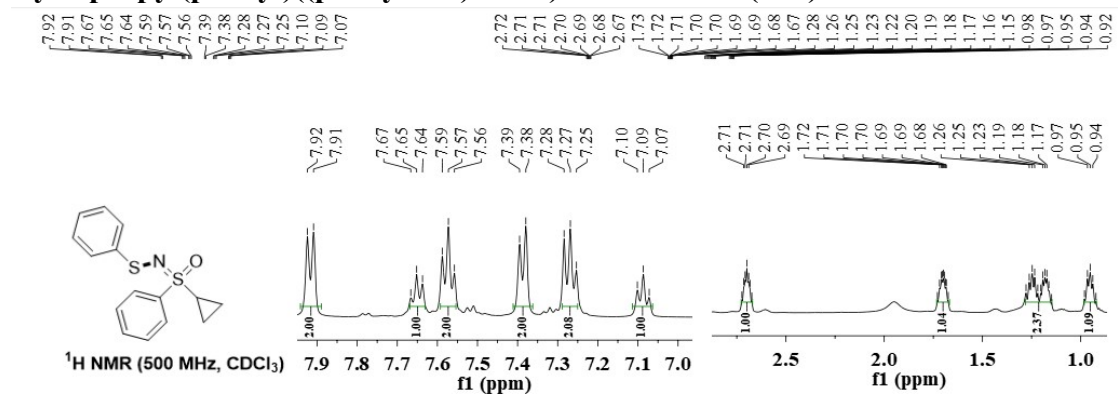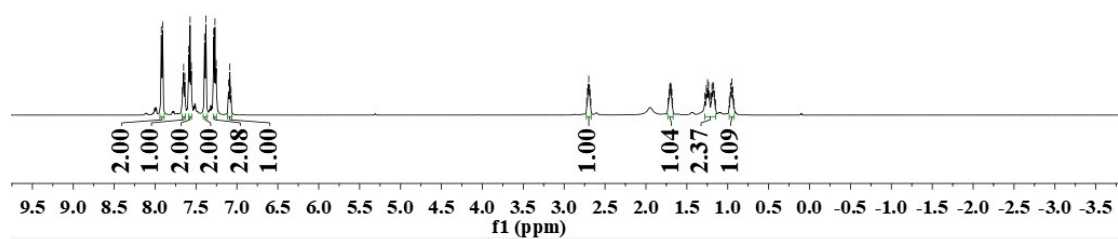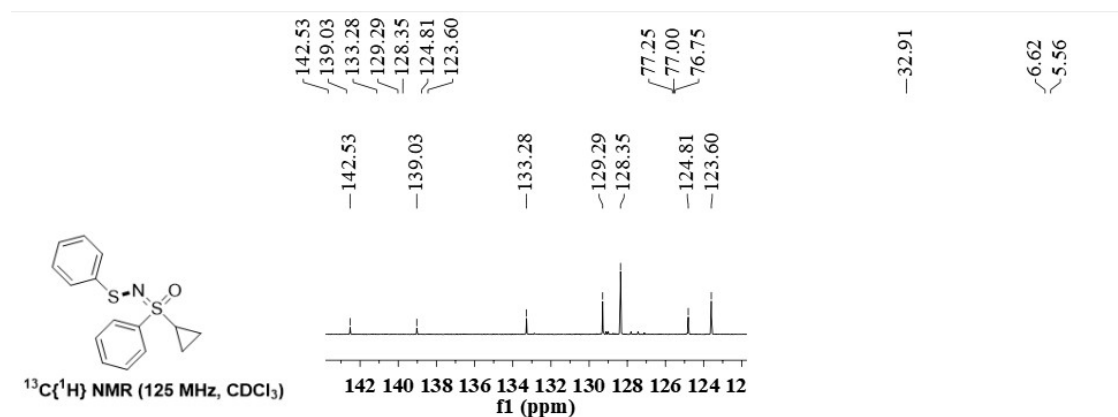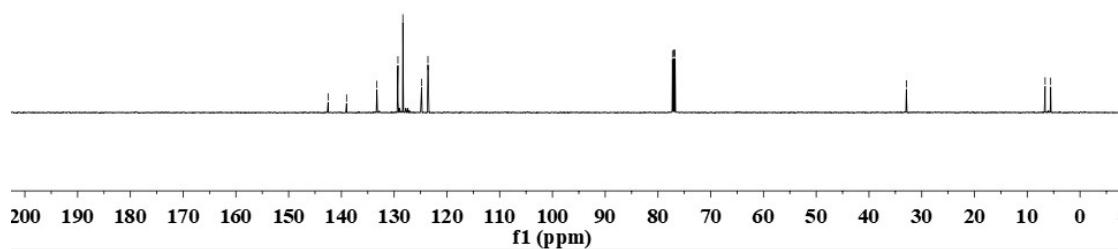

*N*-[Oxo(phenyl)(piperidin-1-yl)- $\lambda^6$ -sulfaneylidene]-*S*-phenylthiohydroxylamine

(3va)

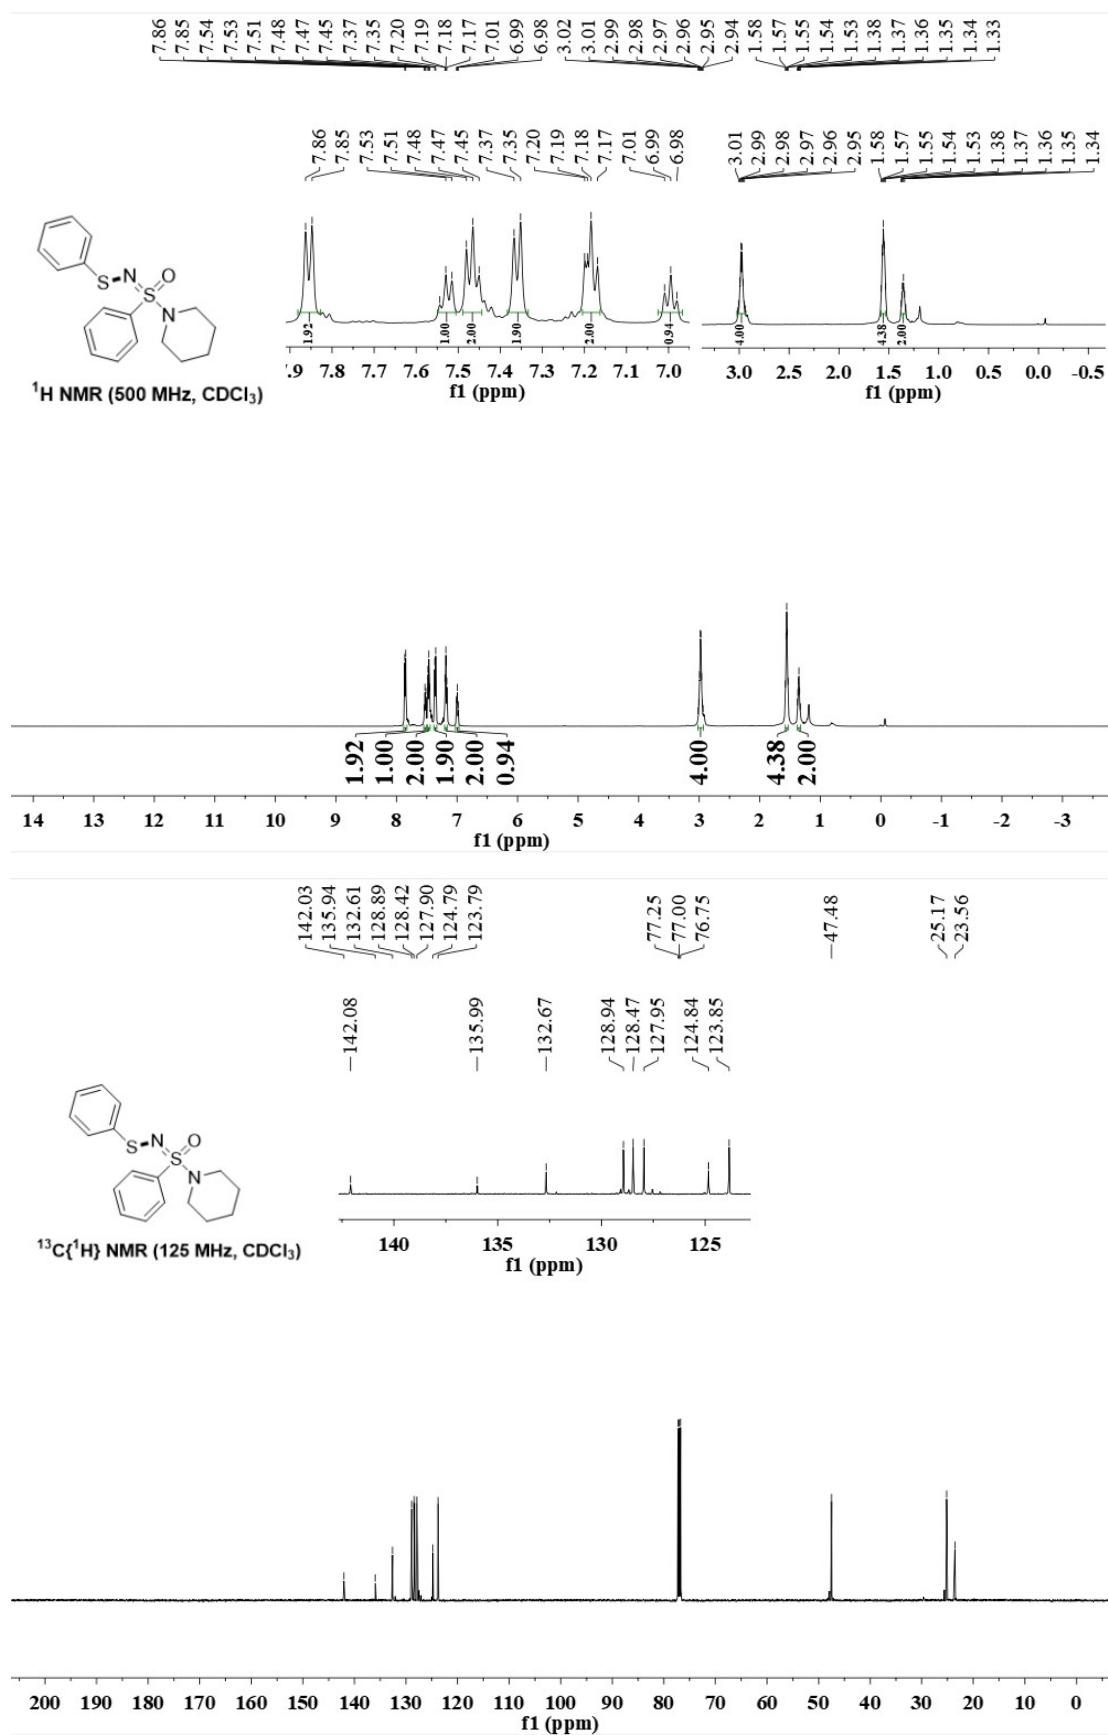

*N*-(Morpholino(oxo)(*p*-tolyl)- $\lambda^6$ -sulfaneylidene)-*S*-phenylthiohydroxylamine (3wa)

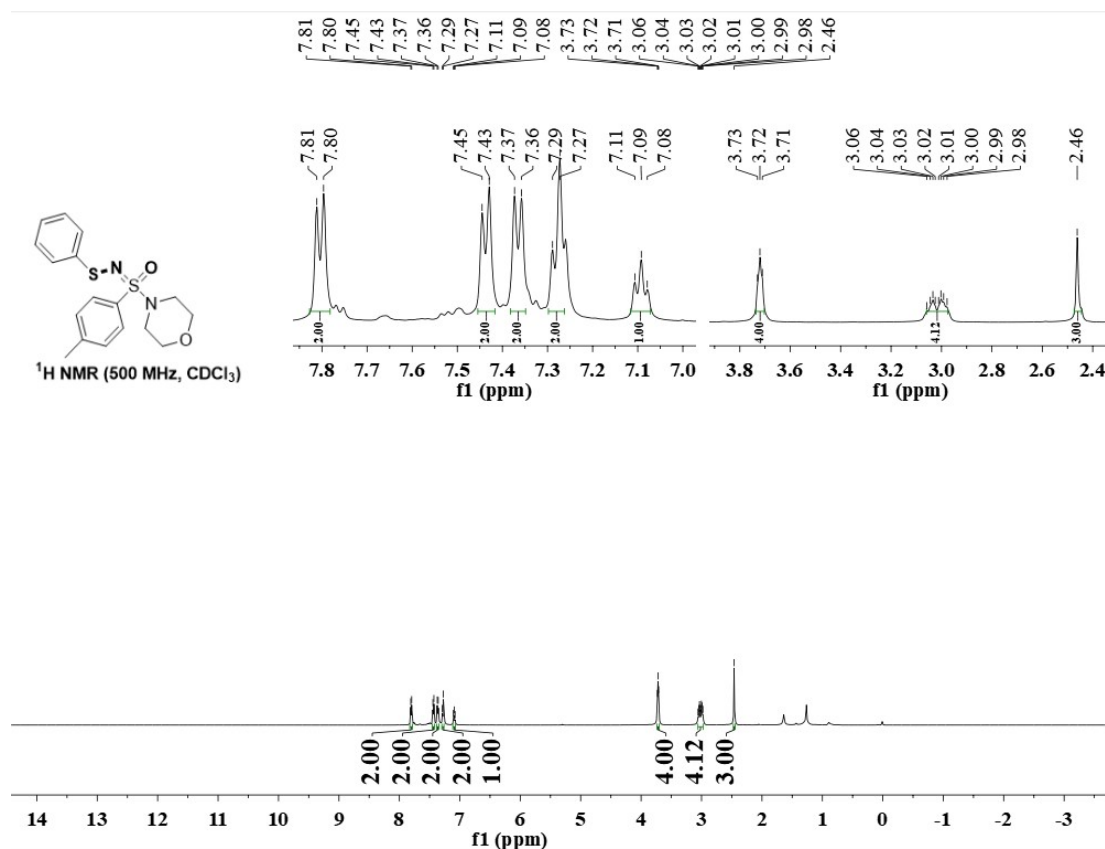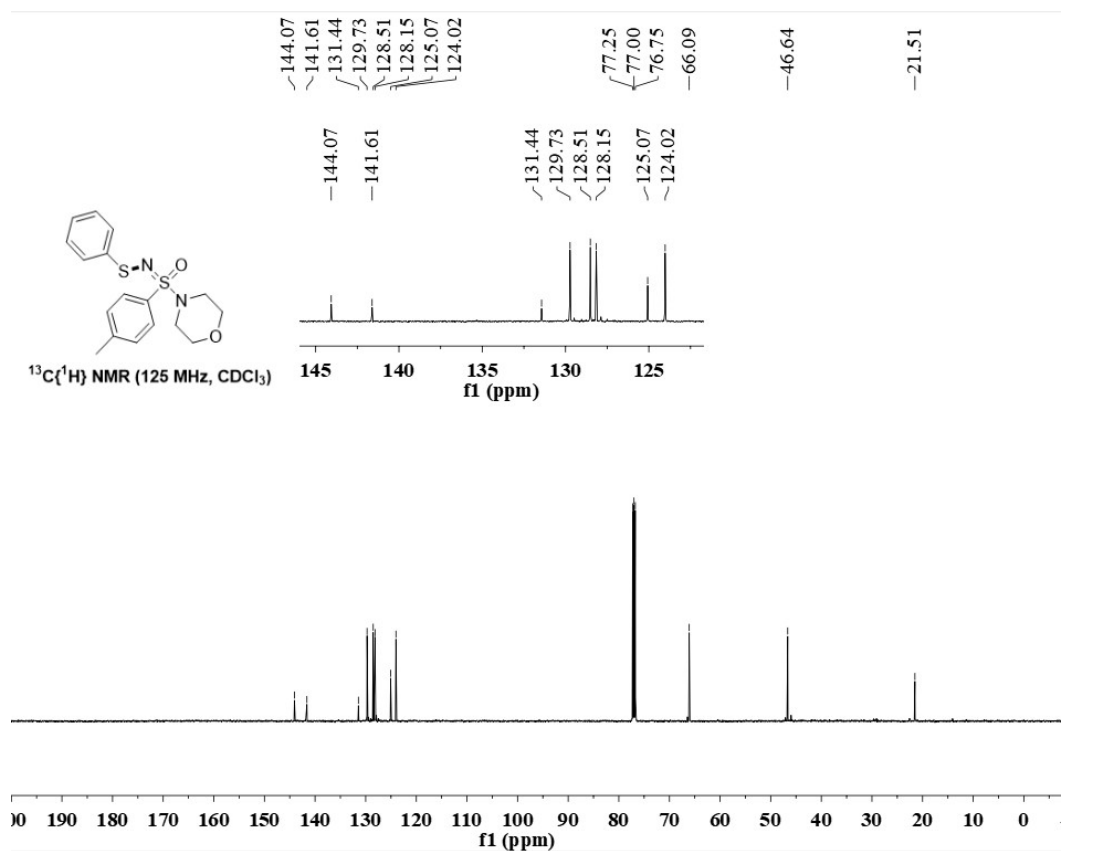

***N*-(Oxo(pyrrolidin-1-yl)(p-tolyl)-λ<sup>6</sup>-sulfaneylidene)-*S*-phenylthiohydroxylamine (3xa)**

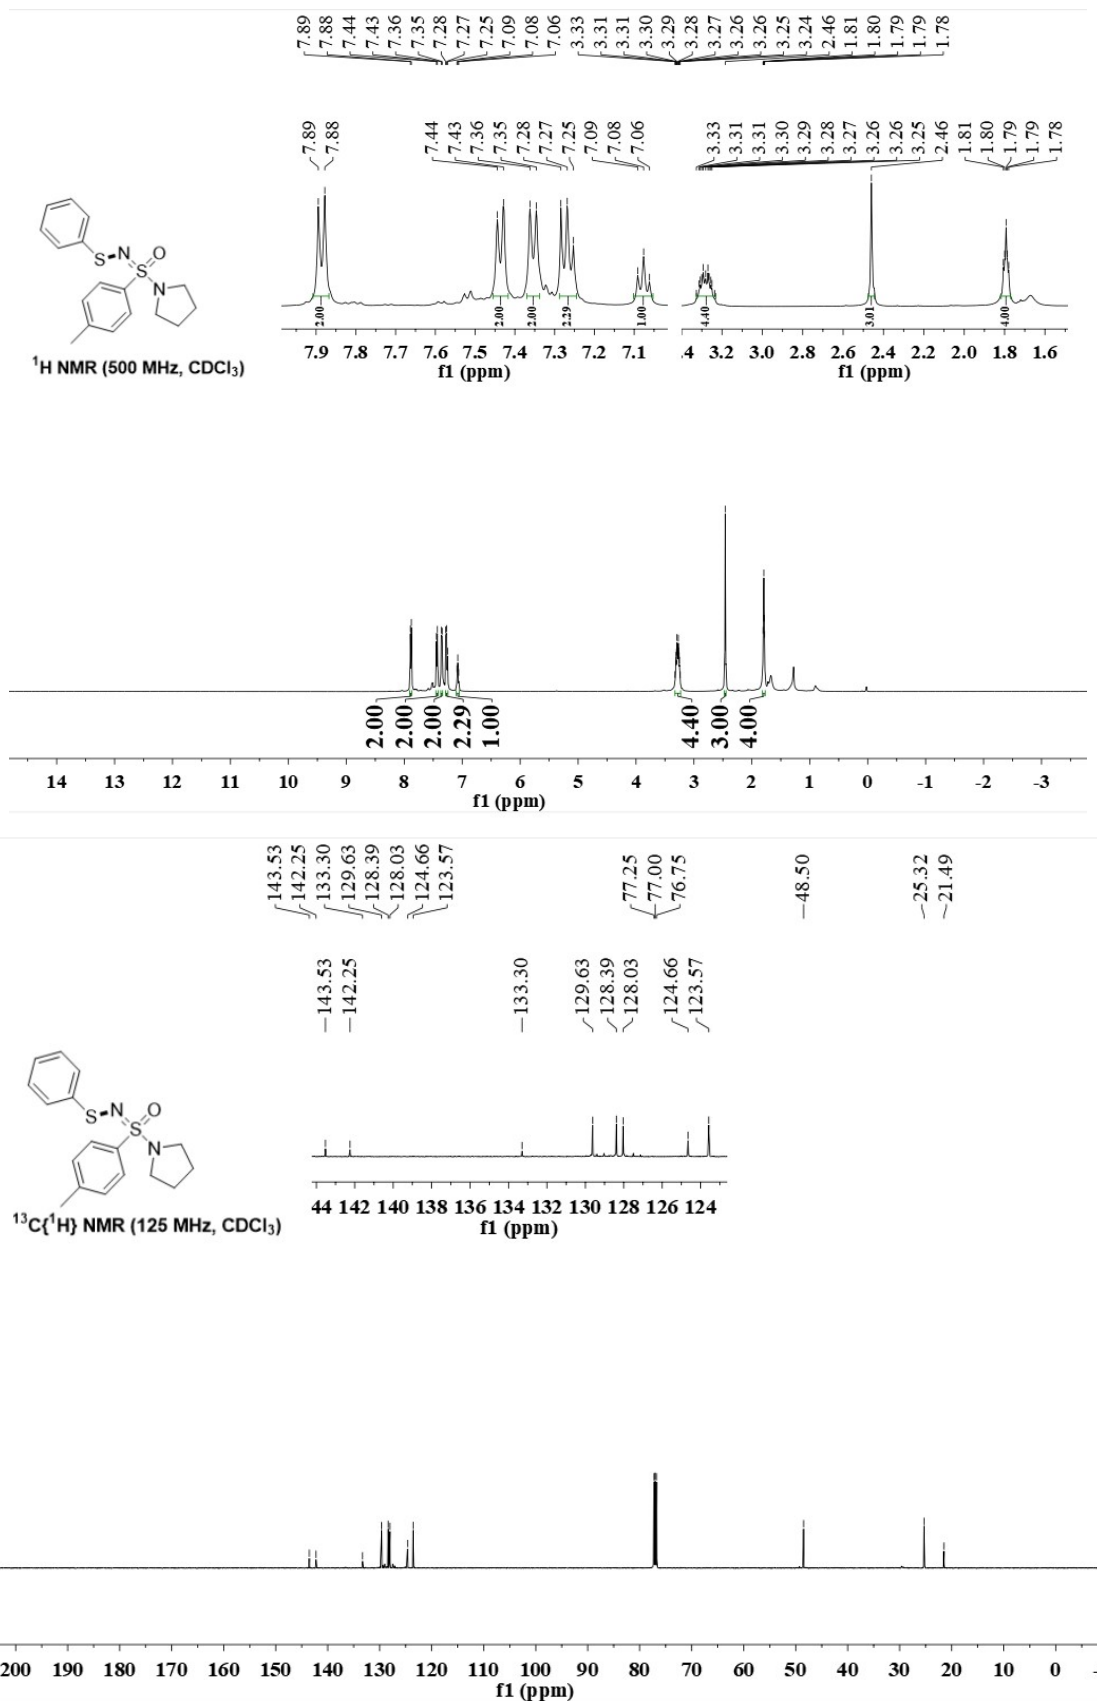

(iodoimino)diphenyl- $\lambda$ 6-sulfanone (1y)

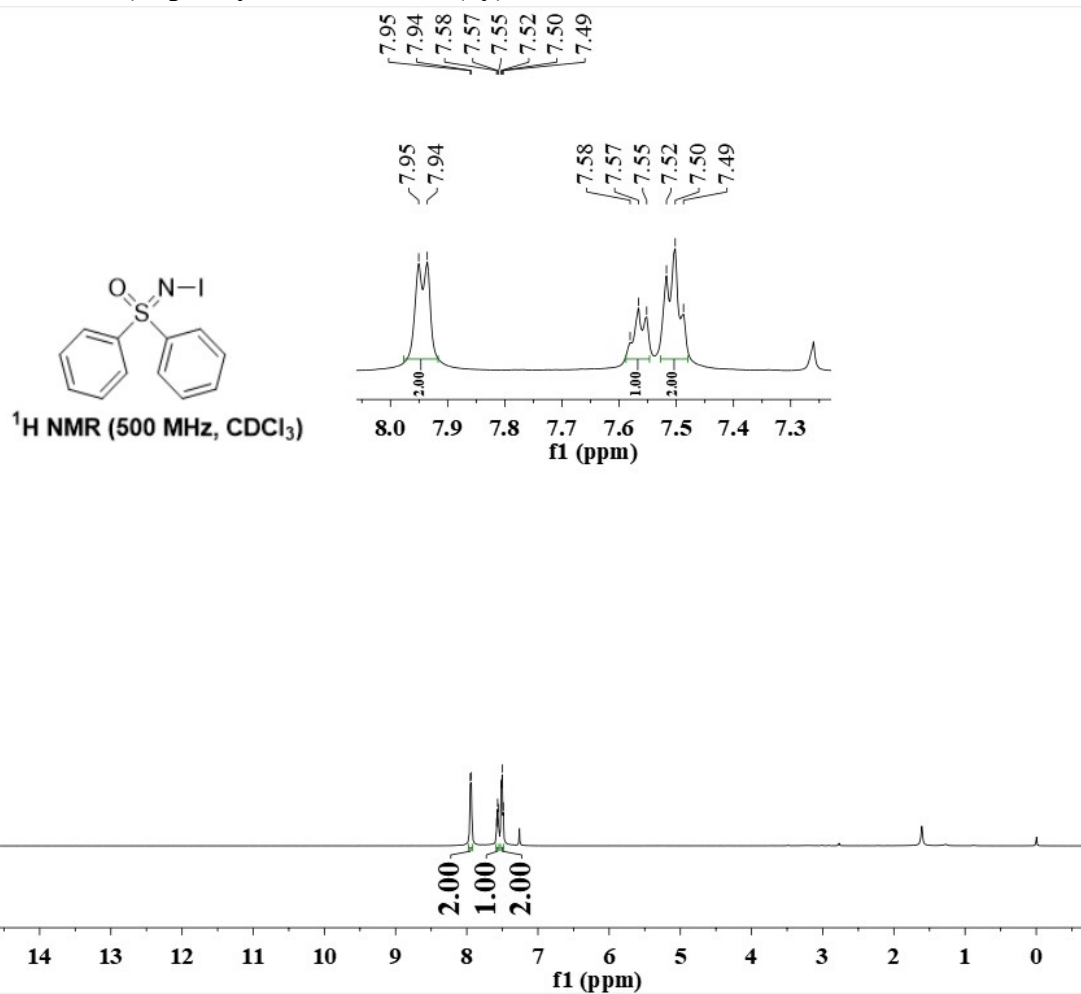

# Diphenyl((p-tolylthio)imino)-λ<sup>6</sup>-sulfanone (3ab)

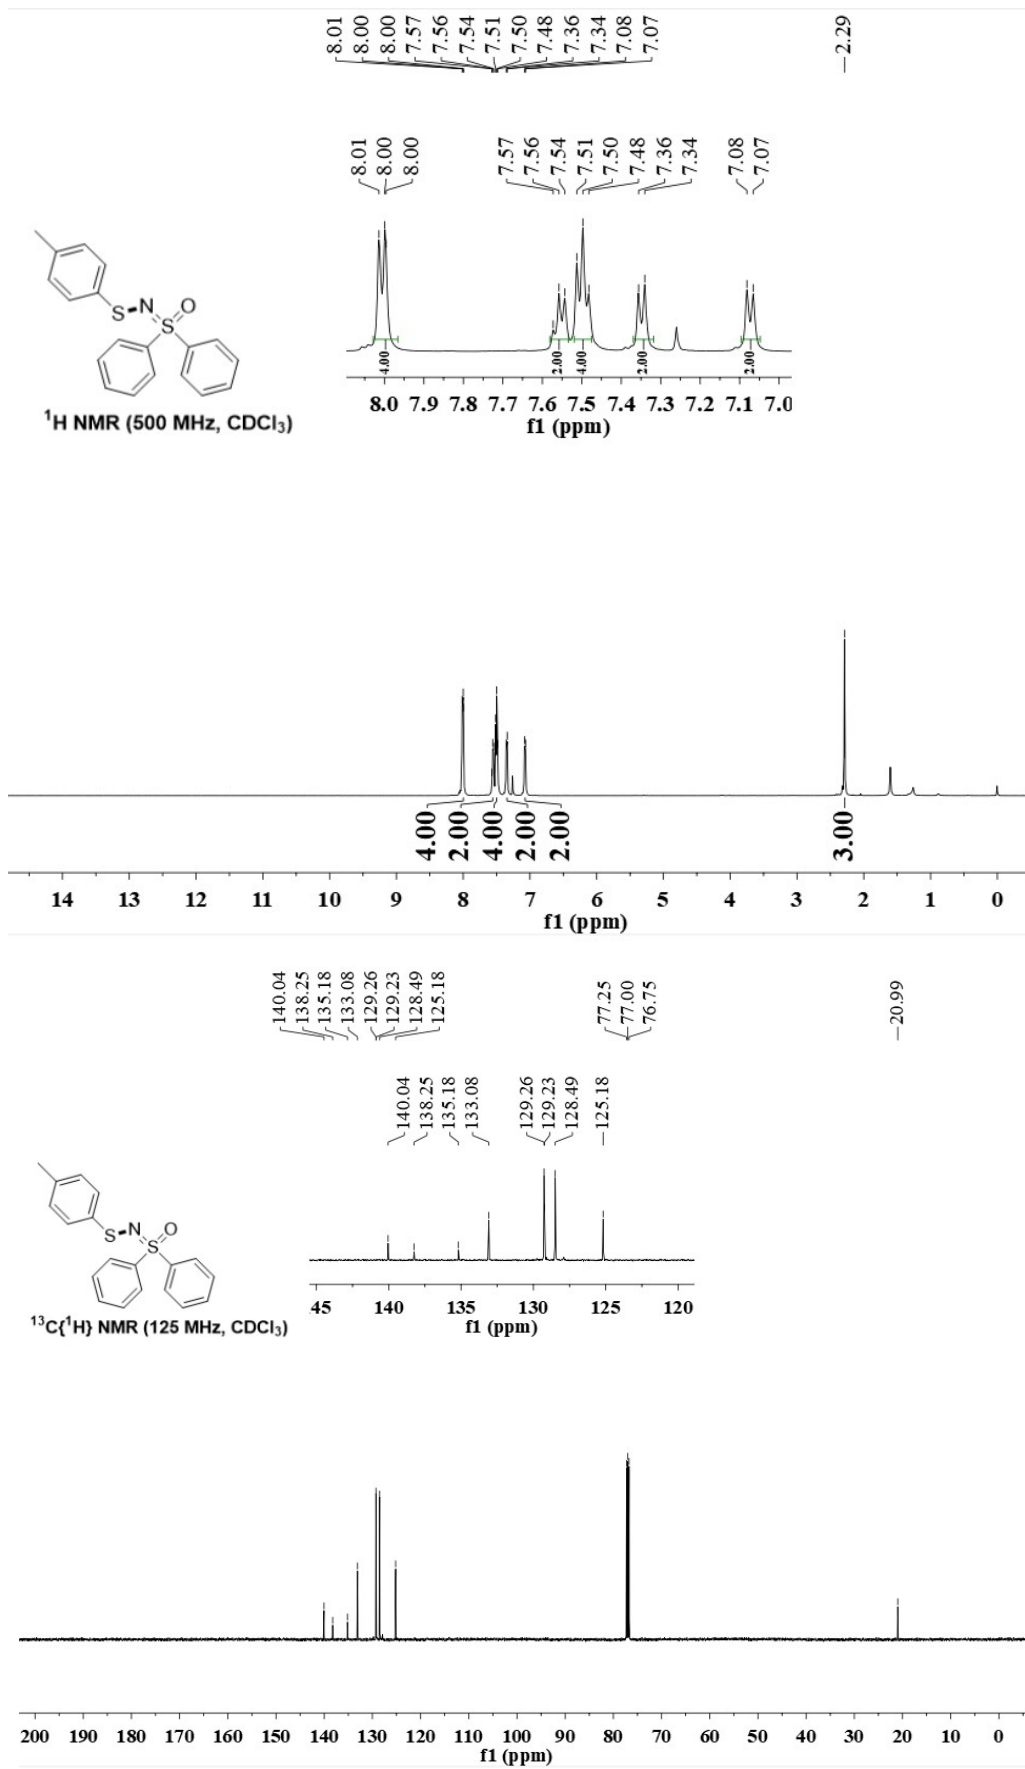

**(((4-Methoxyphenyl)thio)imino)diphenyl- $\lambda^6$ -sulfanone (3ac)**

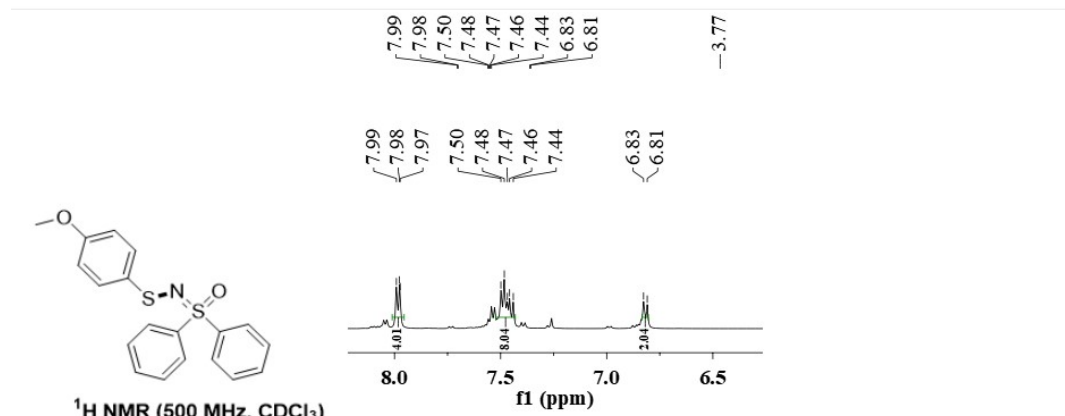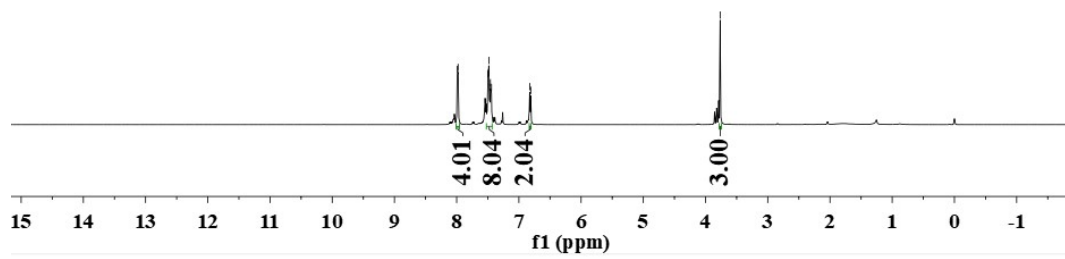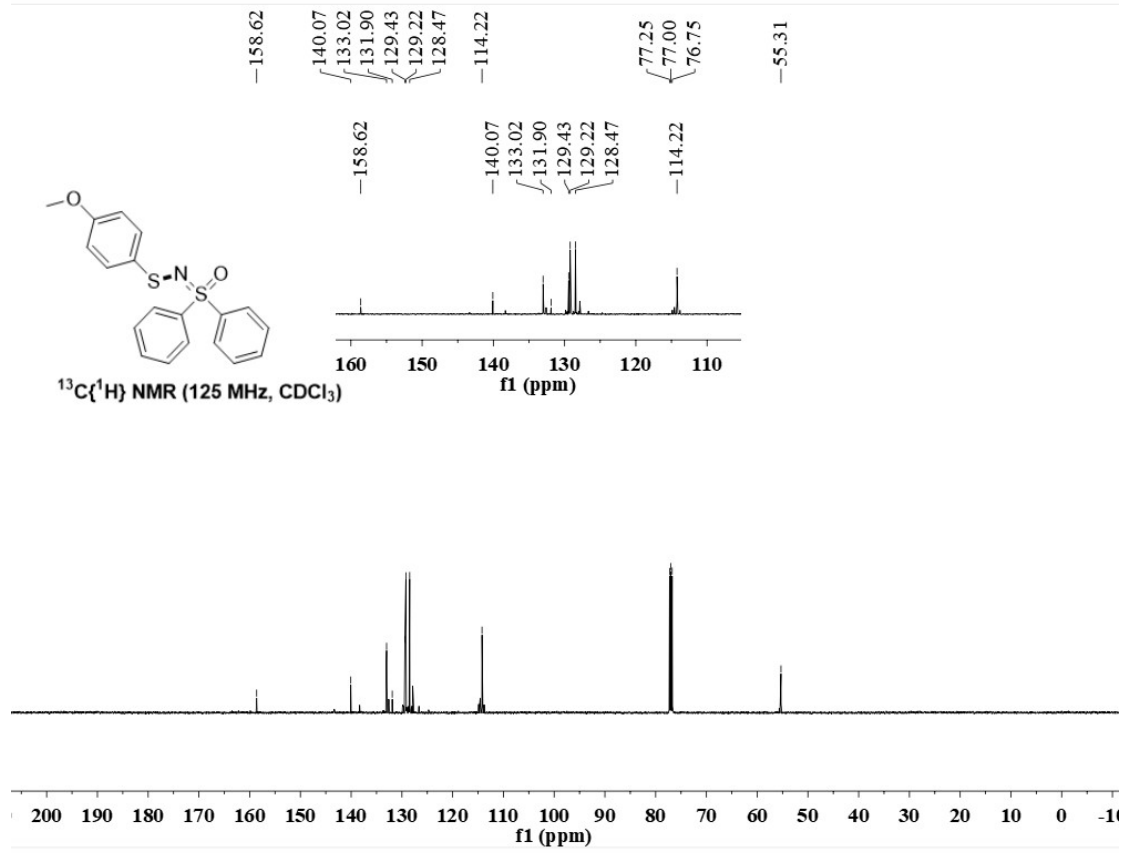

**(((4-Chlorophenyl)thio)imino)diphenyl- $\lambda^6$ -sulfanone (3ad)**

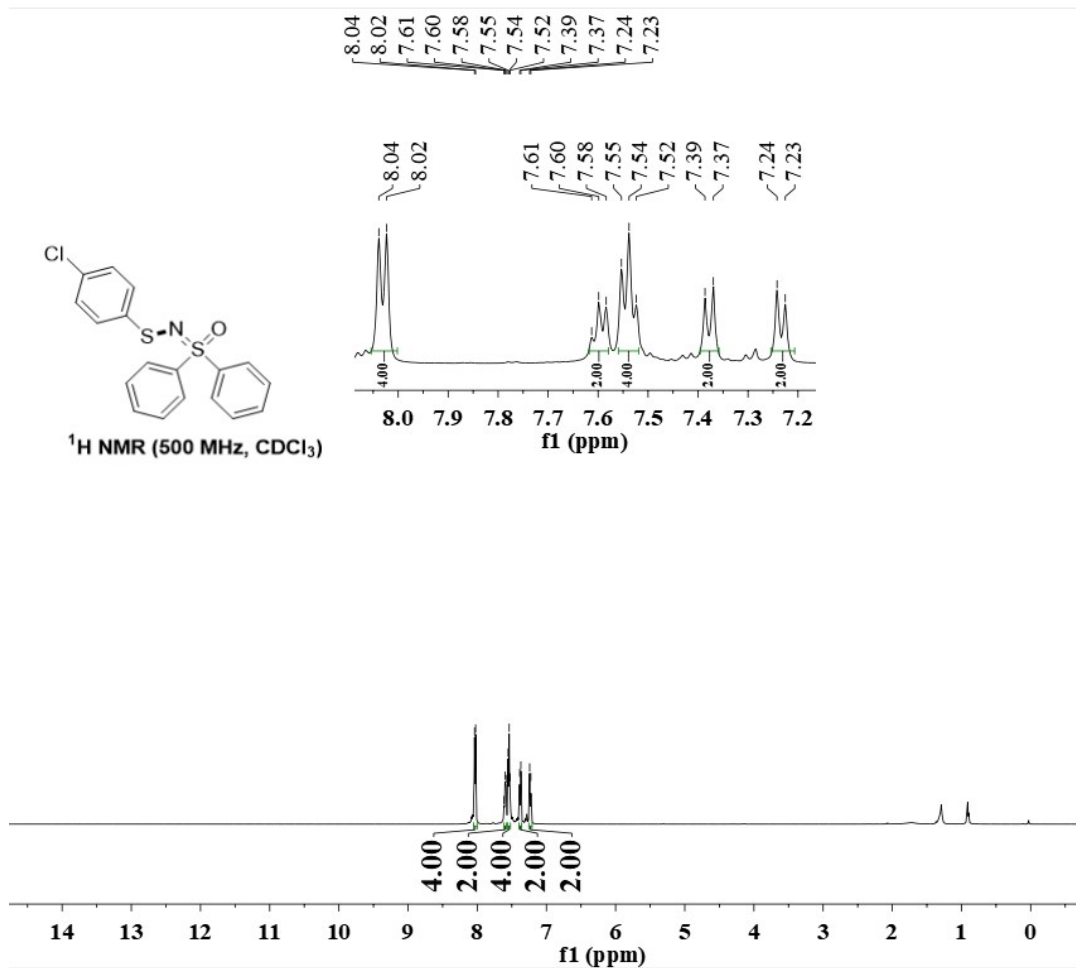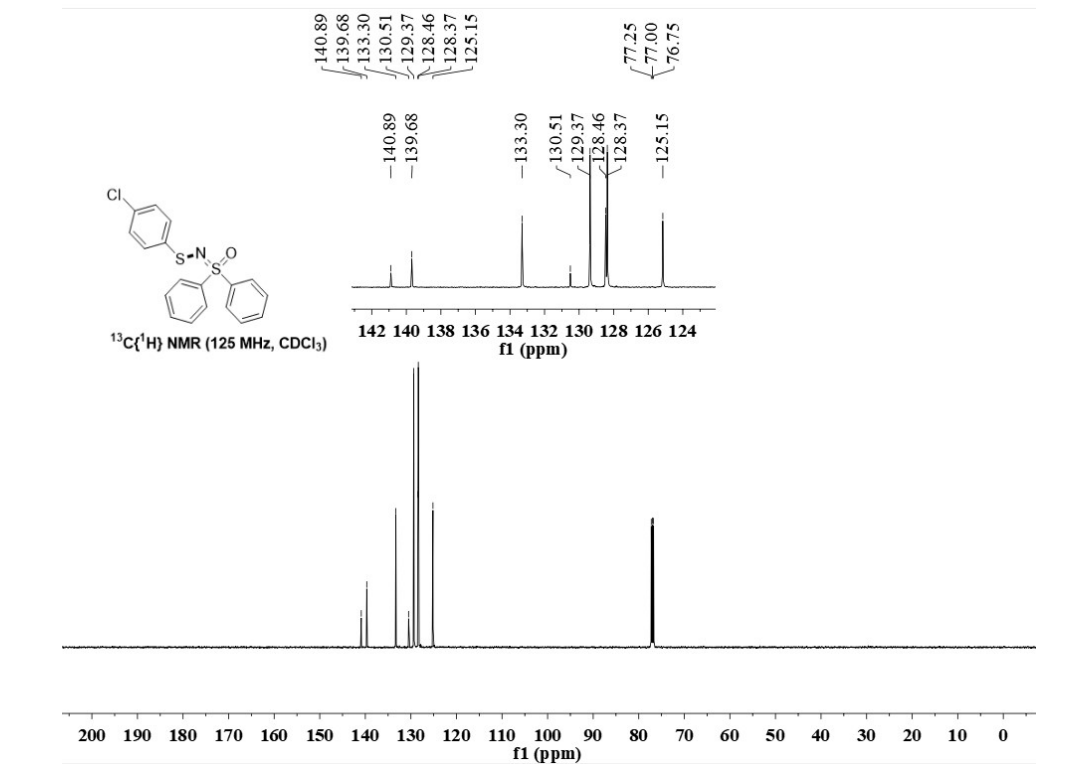



**(((4-Bromophenyl)thio)imino)diphenyl- $\lambda^6$ -sulfanone (3ae)**

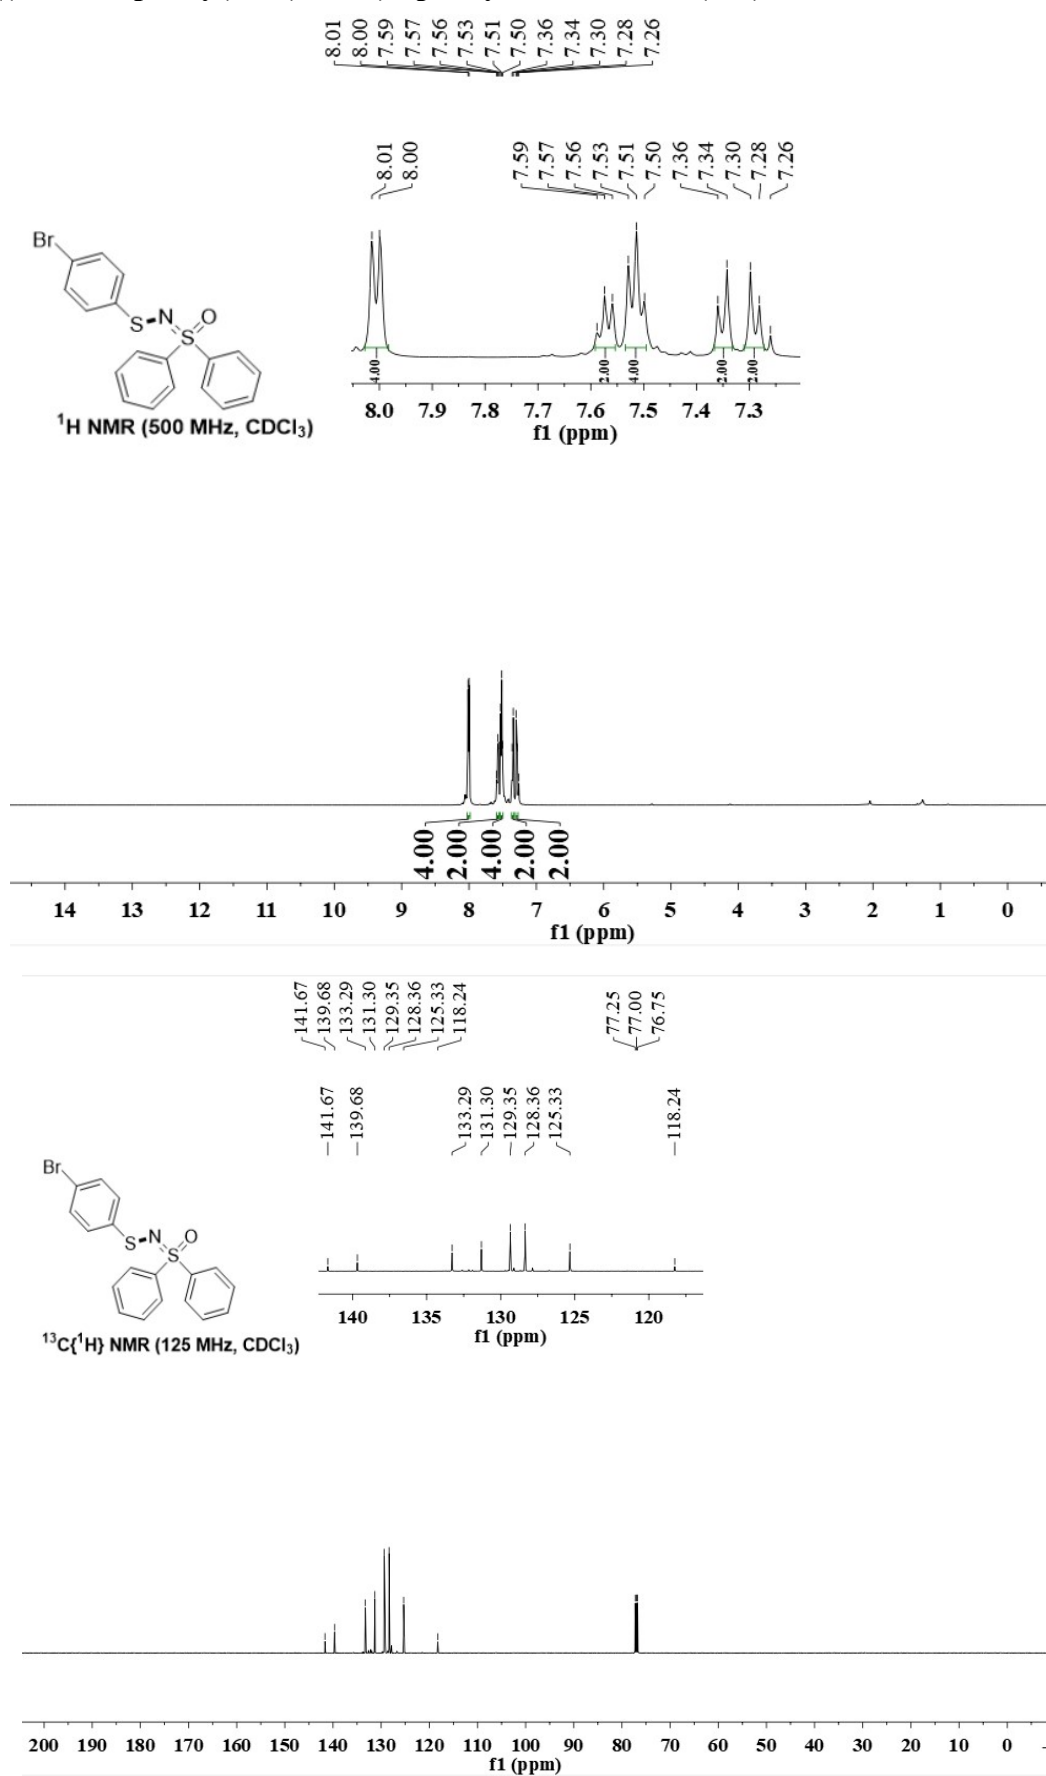

# (((4-Nitrophenyl)thio)imino)diphenyl- $\lambda^6$ -sulfanone (3af)

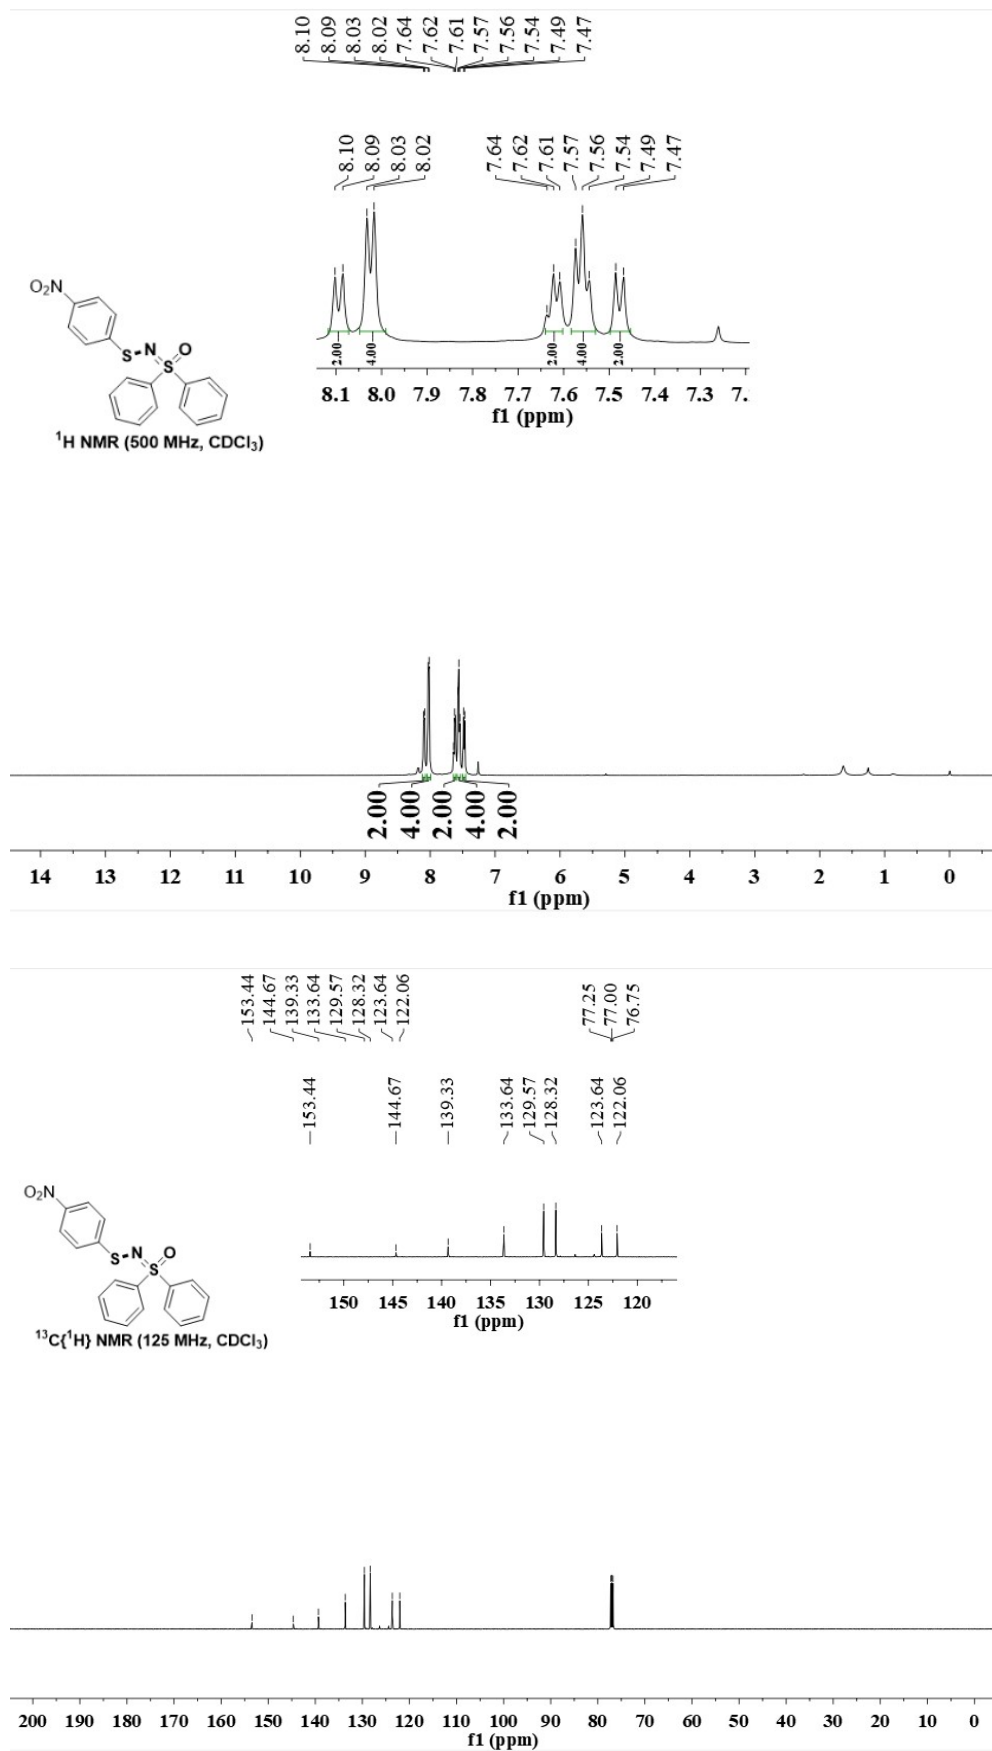

**(((2-Fluorophenyl)thio)imino)diphenyl- $\lambda^6$ -sulfanone (3ag)**

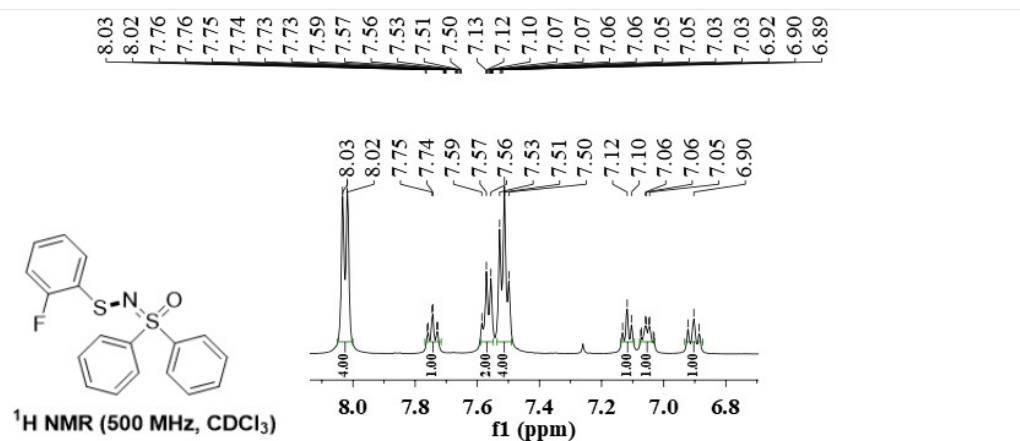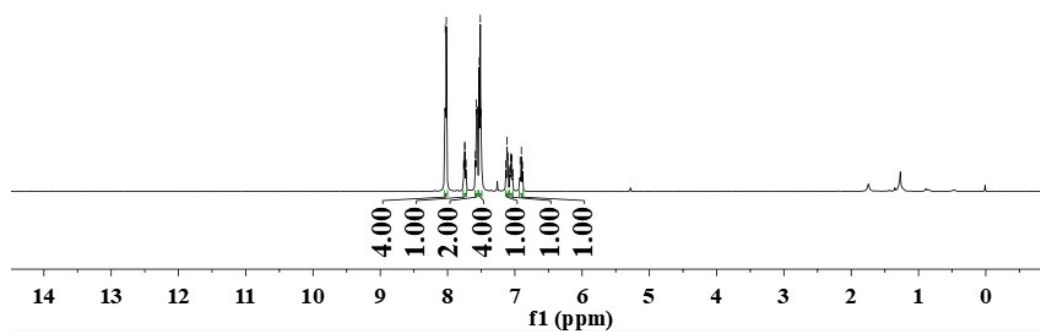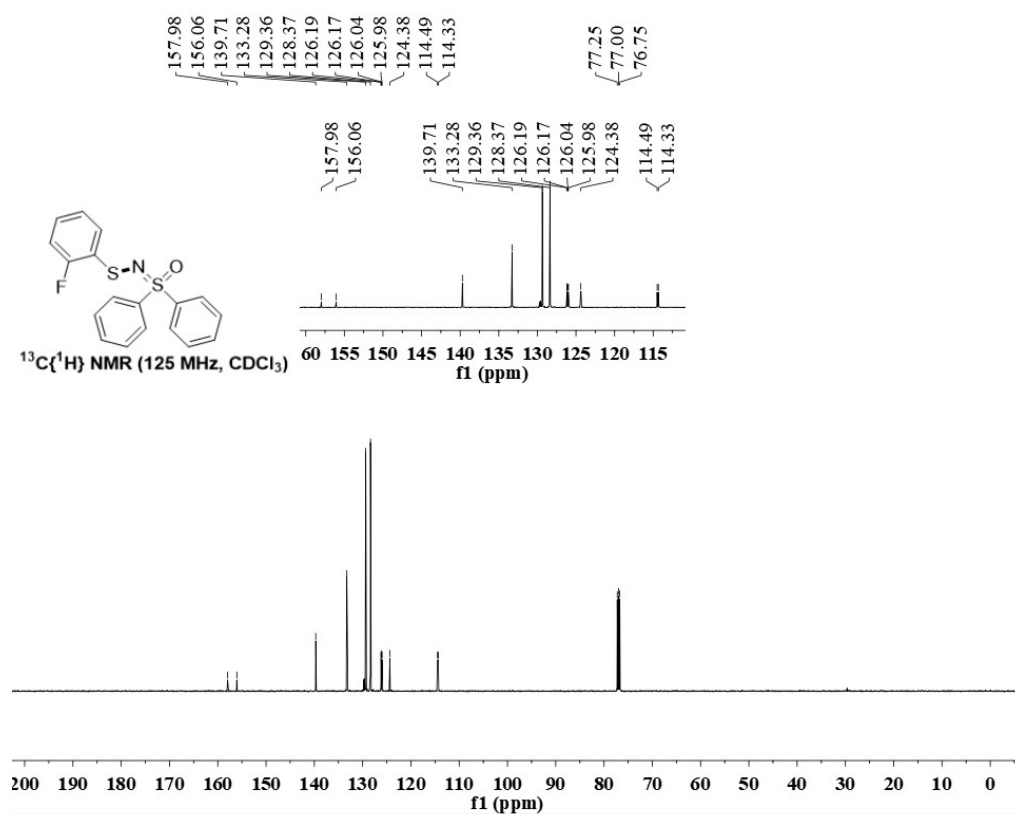

### Diphenyl((thiophen-2-ylthio)imino)-λ<sup>6</sup>-sulfanone (3ah)

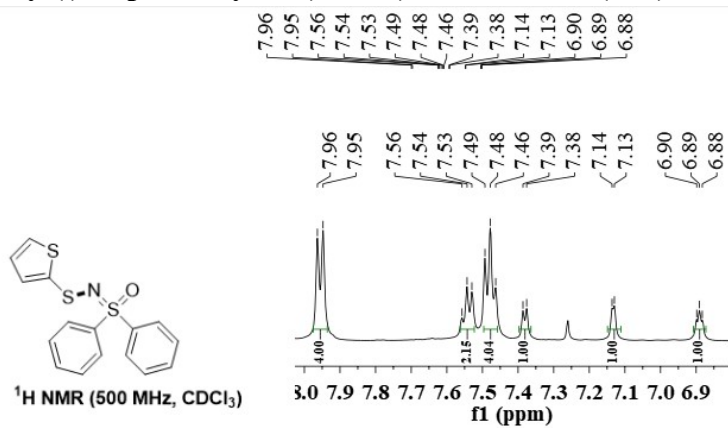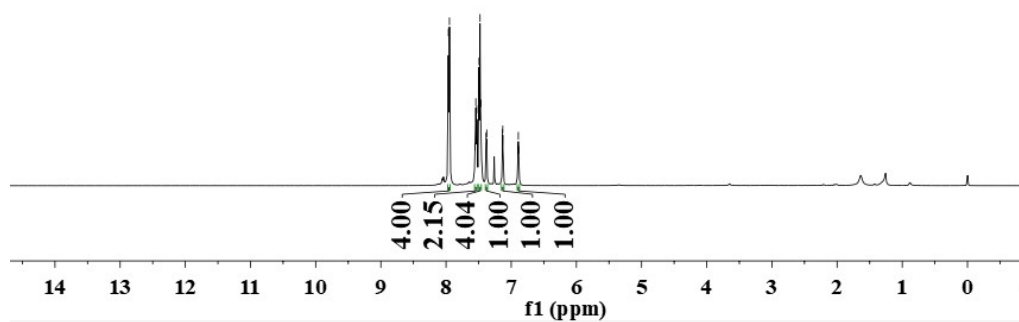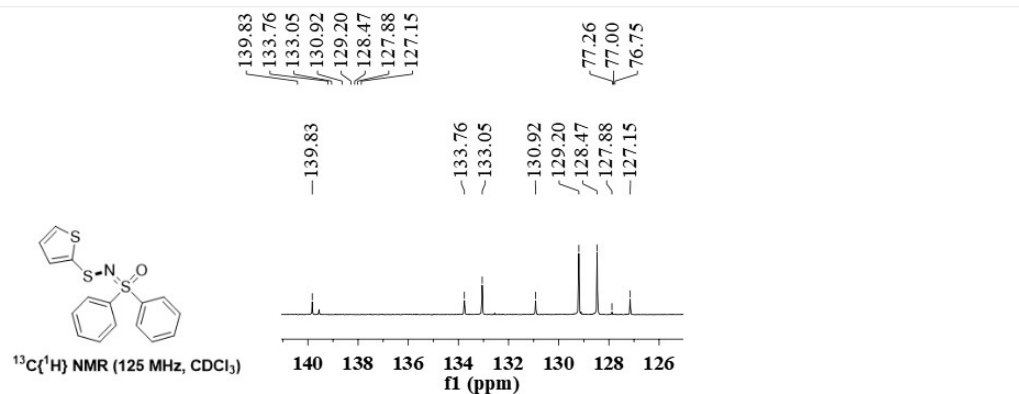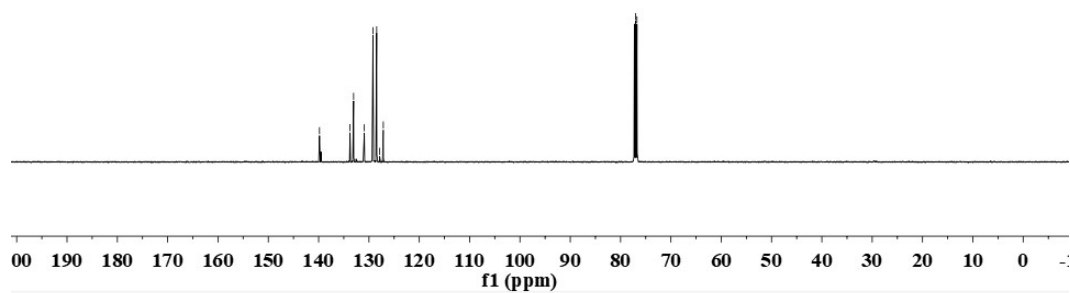

### Diphenyl((pyridin-4-ylthio)imino)-λ<sup>6</sup>-sulfanone (3ai)

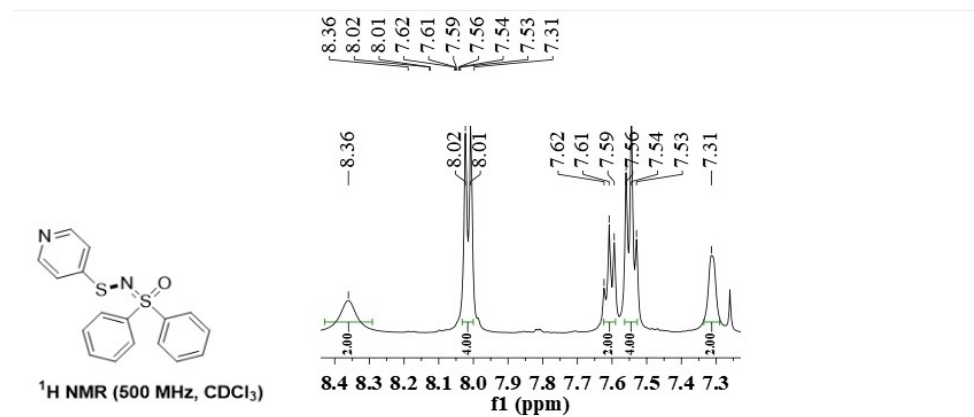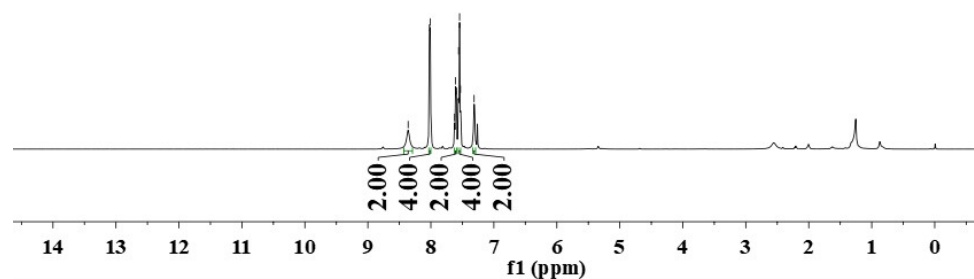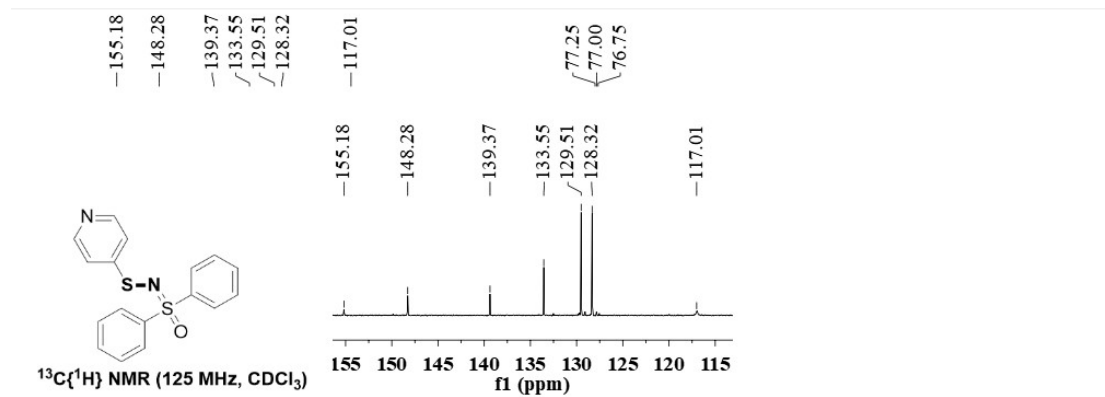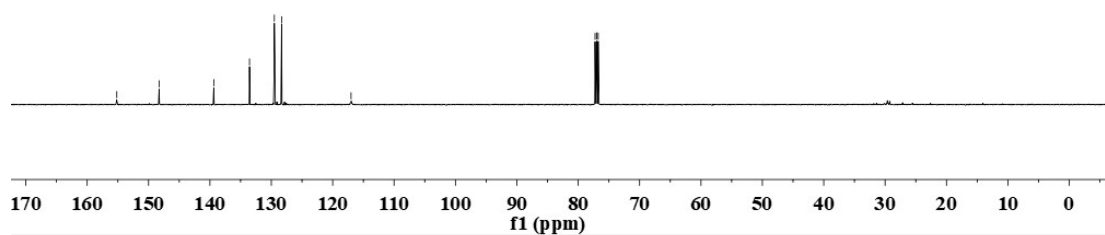

# Diphenyl((pyridin-2-ylthio)imino)-λ<sup>6</sup>-sulfanone (3aj)

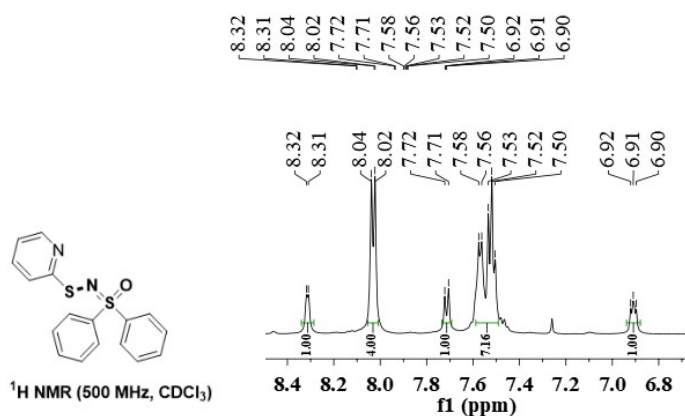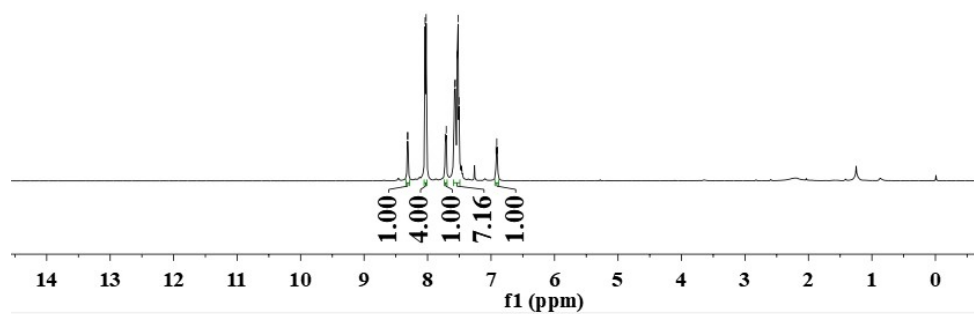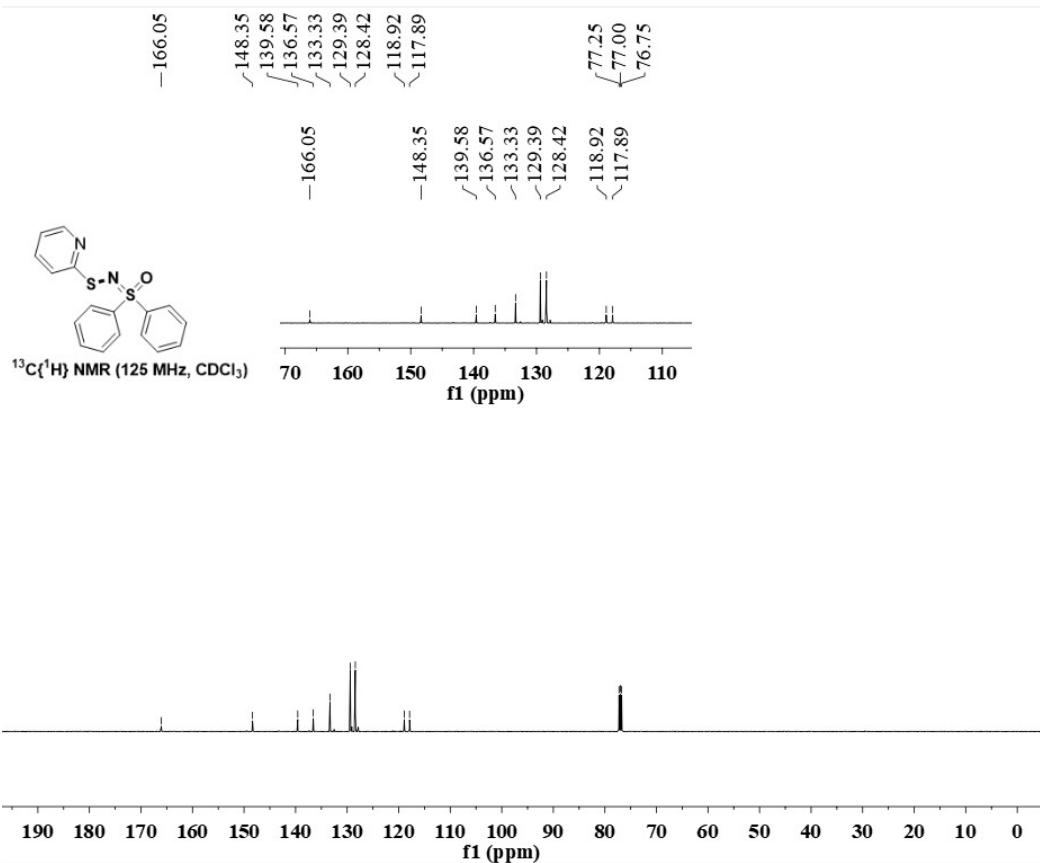

**((Methylthio)imino)diphenyl- $\lambda^6$ -sulfanone (3ak)**

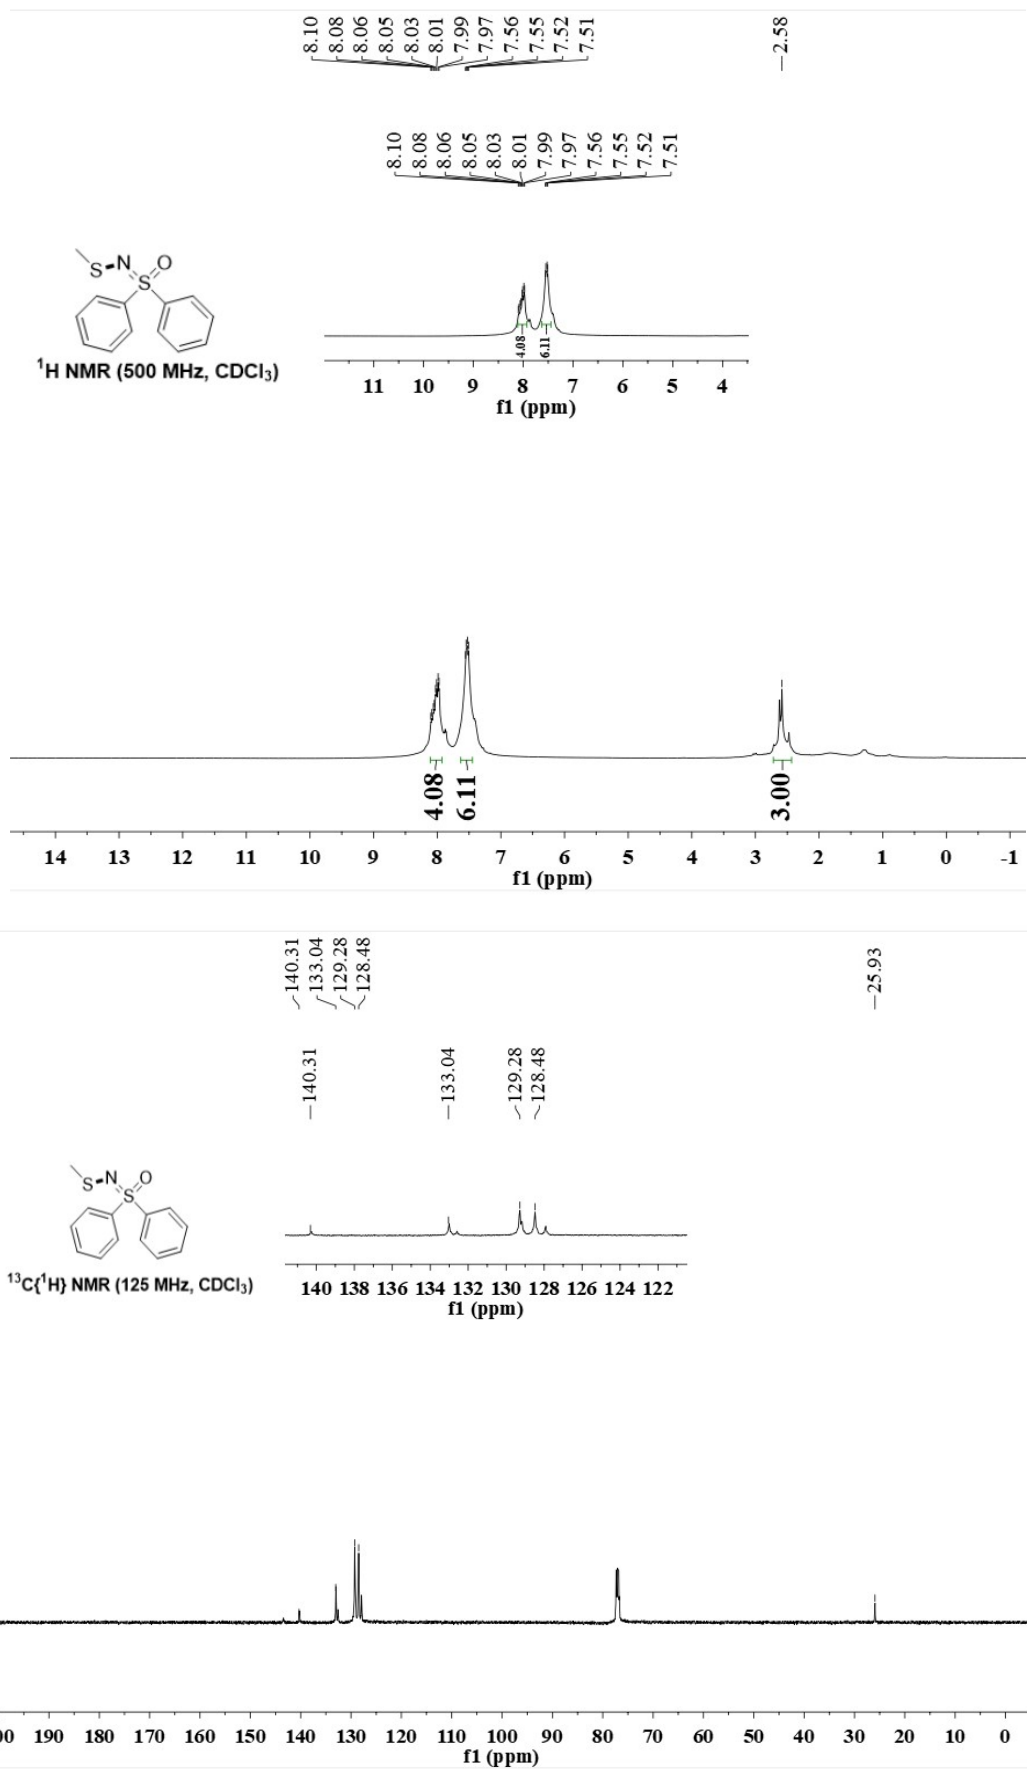

### ((Cyclohexylthio)imino)diphenyl- $\lambda^6$ -sulfanone (3a)

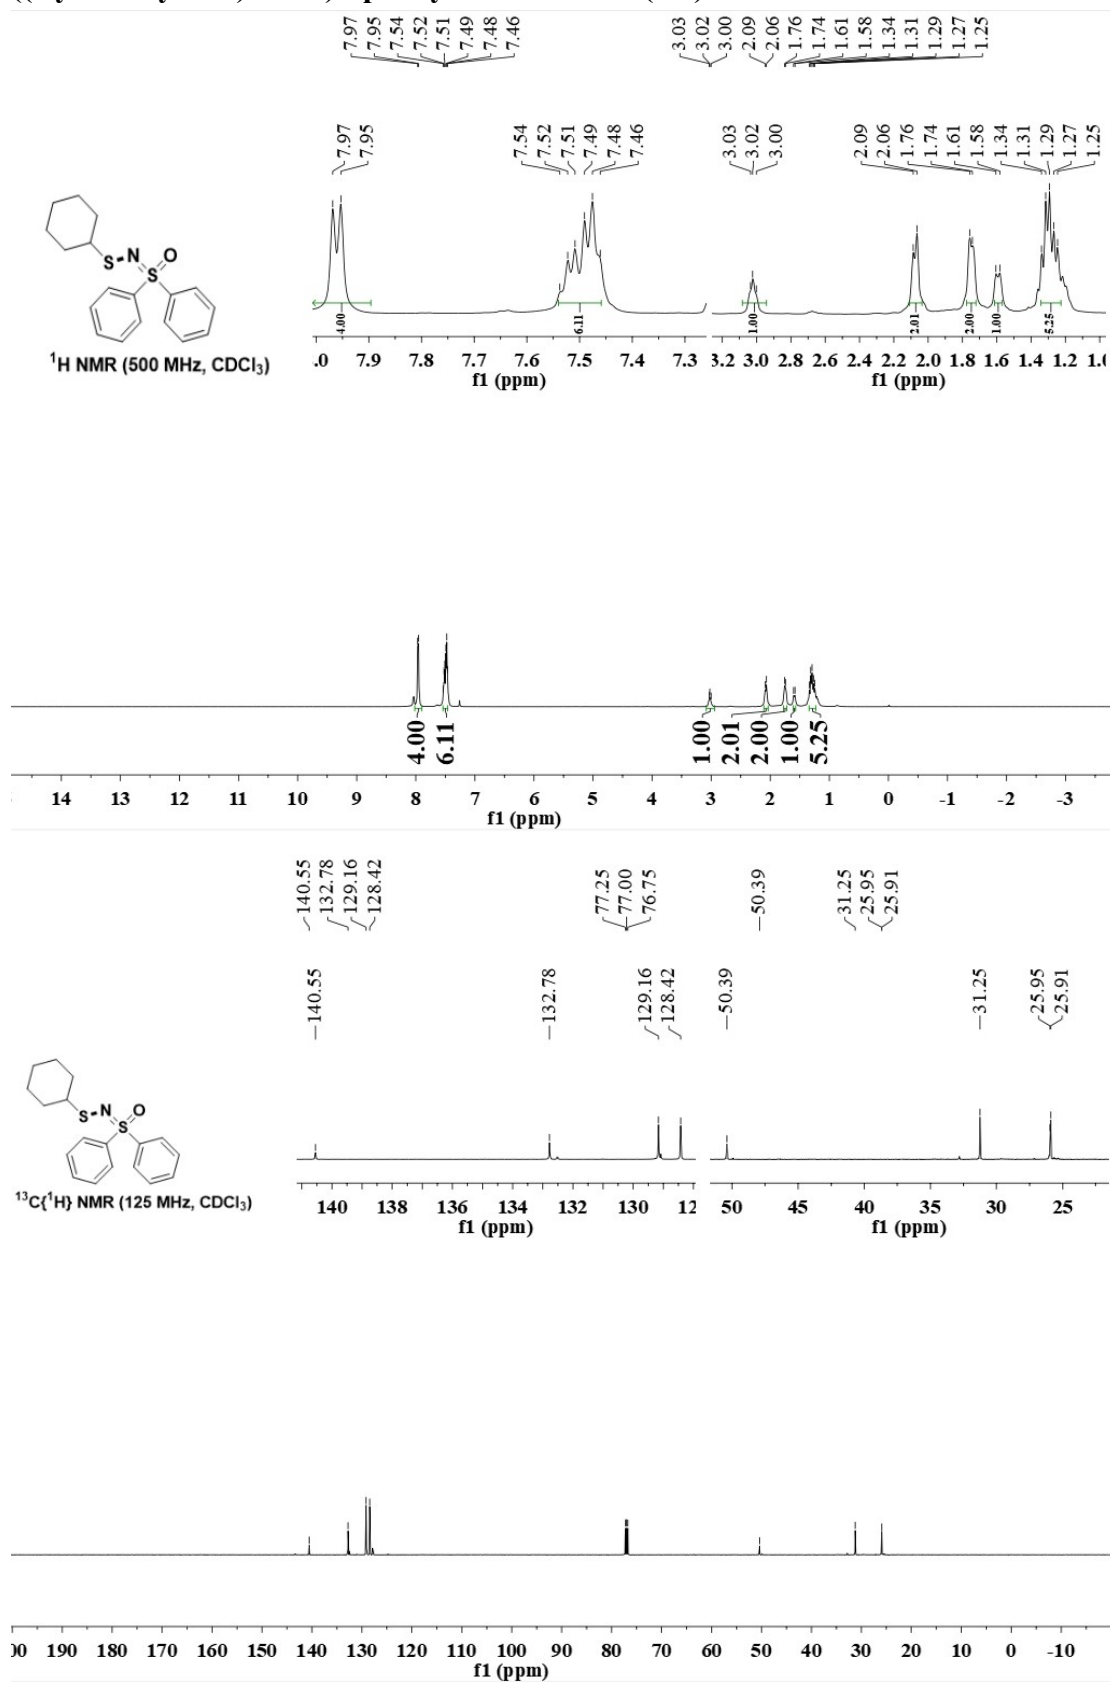



## 1,2-Bis(4-methoxyphenyl) disulfane (2c)

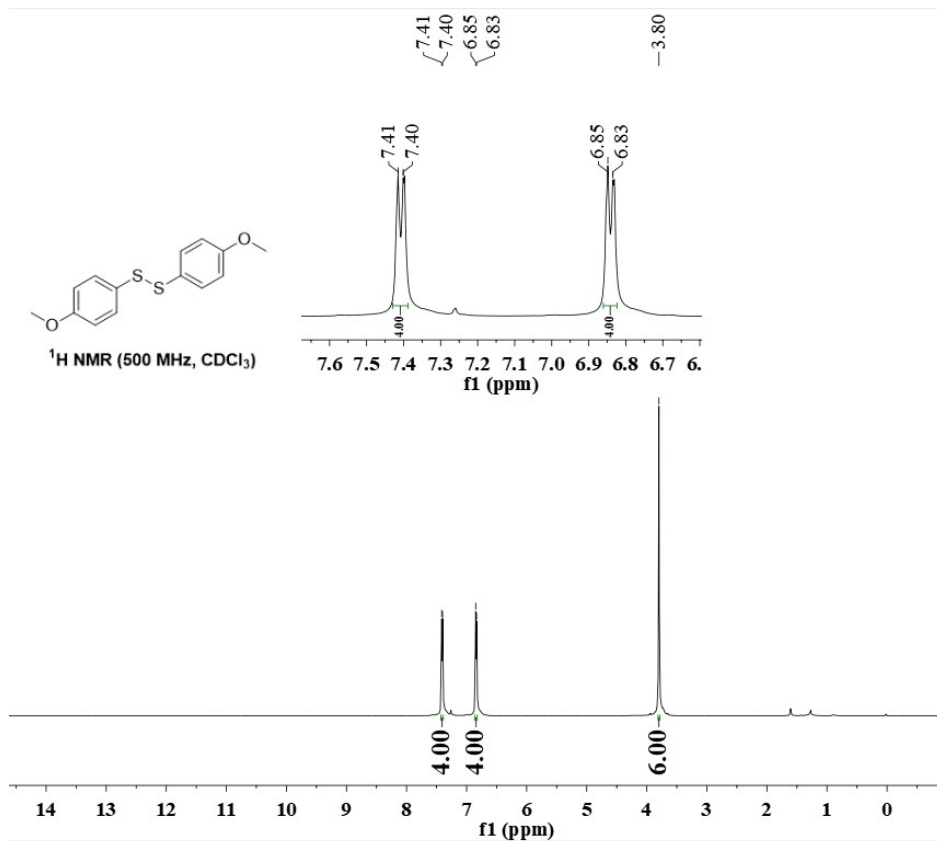

## Bis(4-chlorophenyl) disulfide (2d)

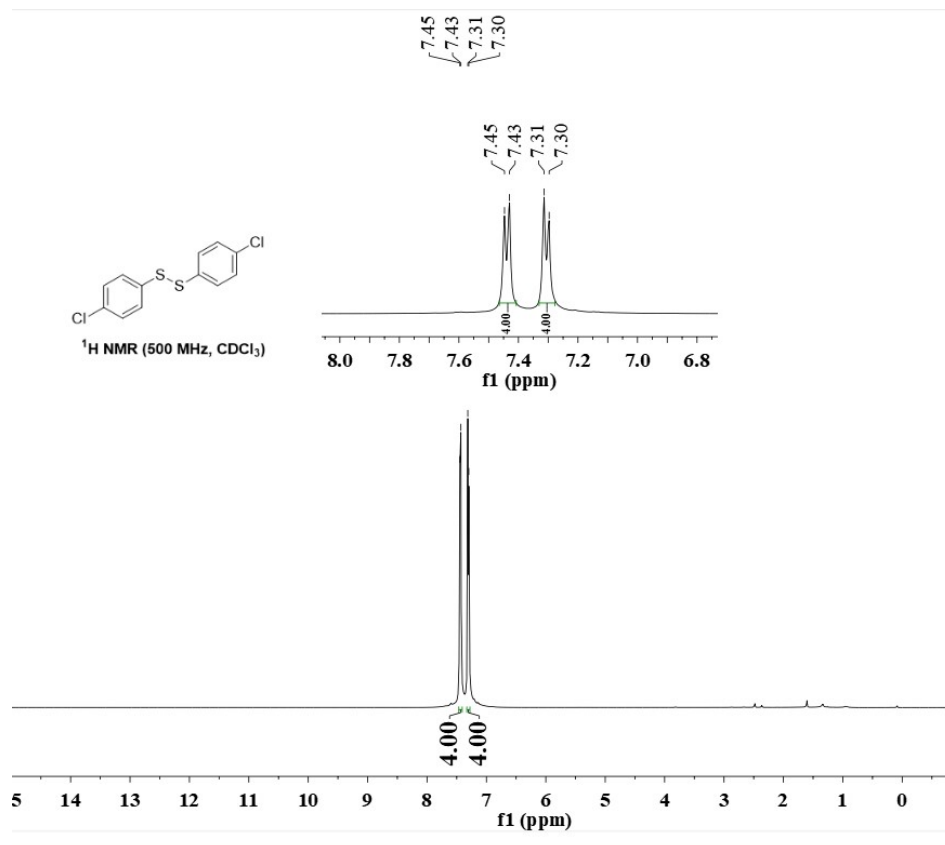

***N,N'*-(Disulfanediylbis(2,1-phenylene))bis(4-chlorobenzamide) (2m)**

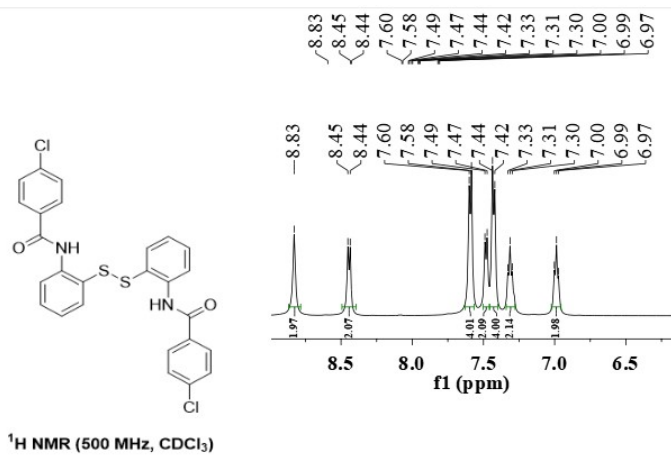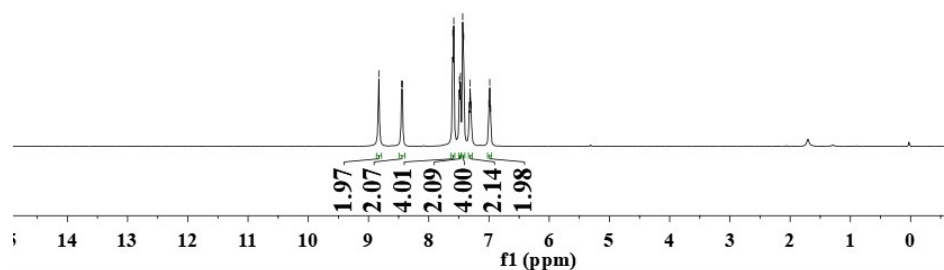

***N,N'*-(Disulfanediylbis(2,1-phenylene))bis(6-chloronicotinamide) (2n)**

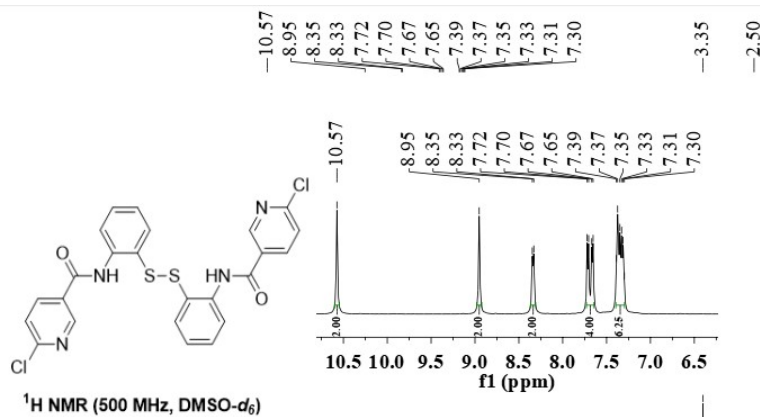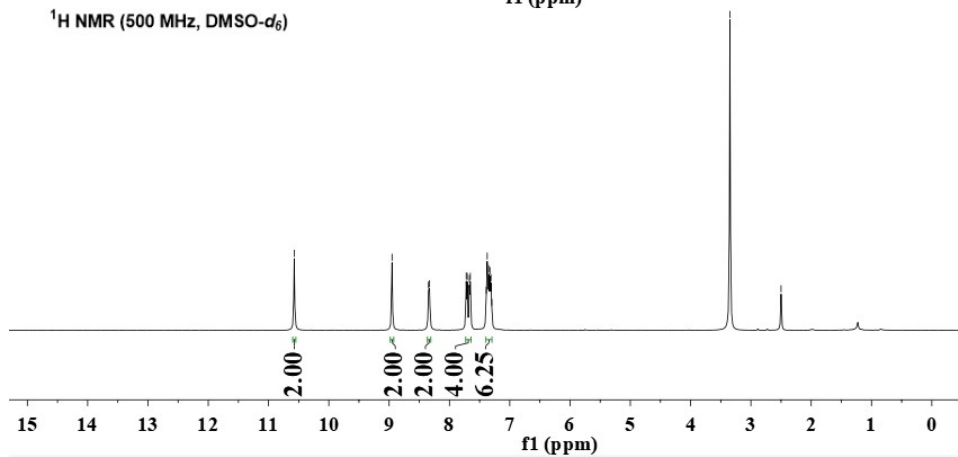

# 1-(4-Bromophenyl)-2-(4-methoxyphenyl)disulfane (2o)

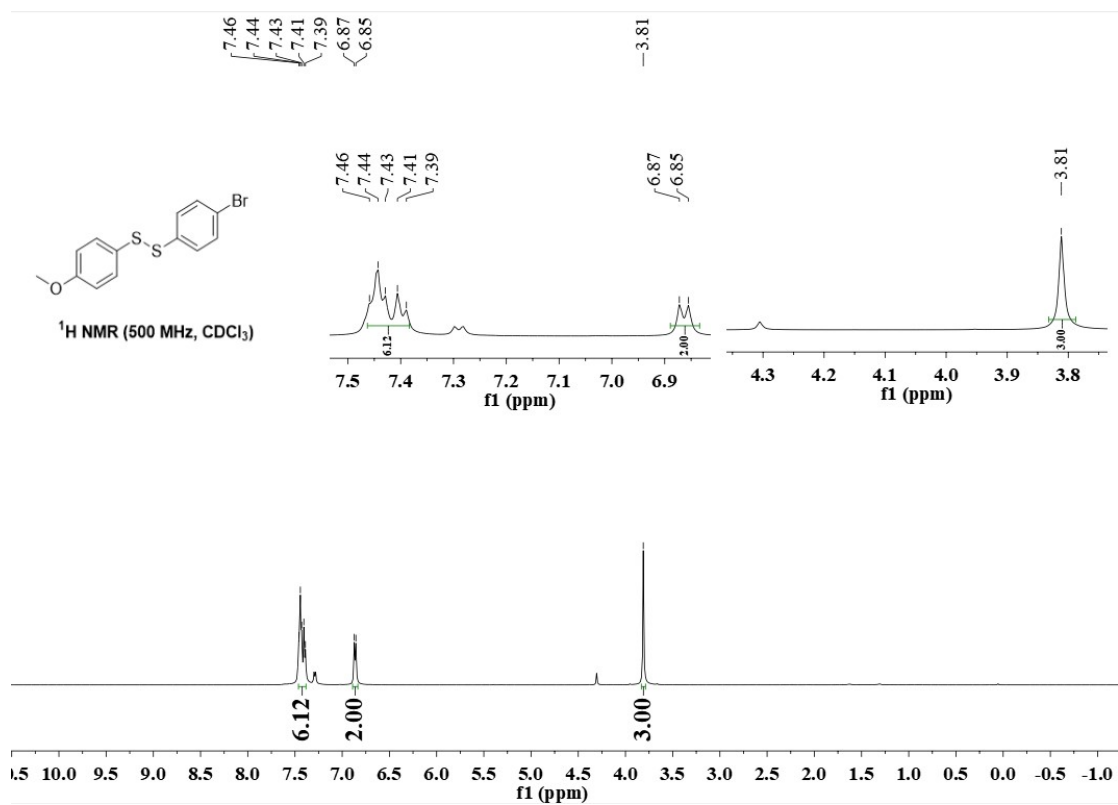

***N*-2-(((Cyclopropyl(oxo)(phenyl)- $\lambda^6$ -sulfanylidene)amino)thio)phenyl)-benzamide (4a)**

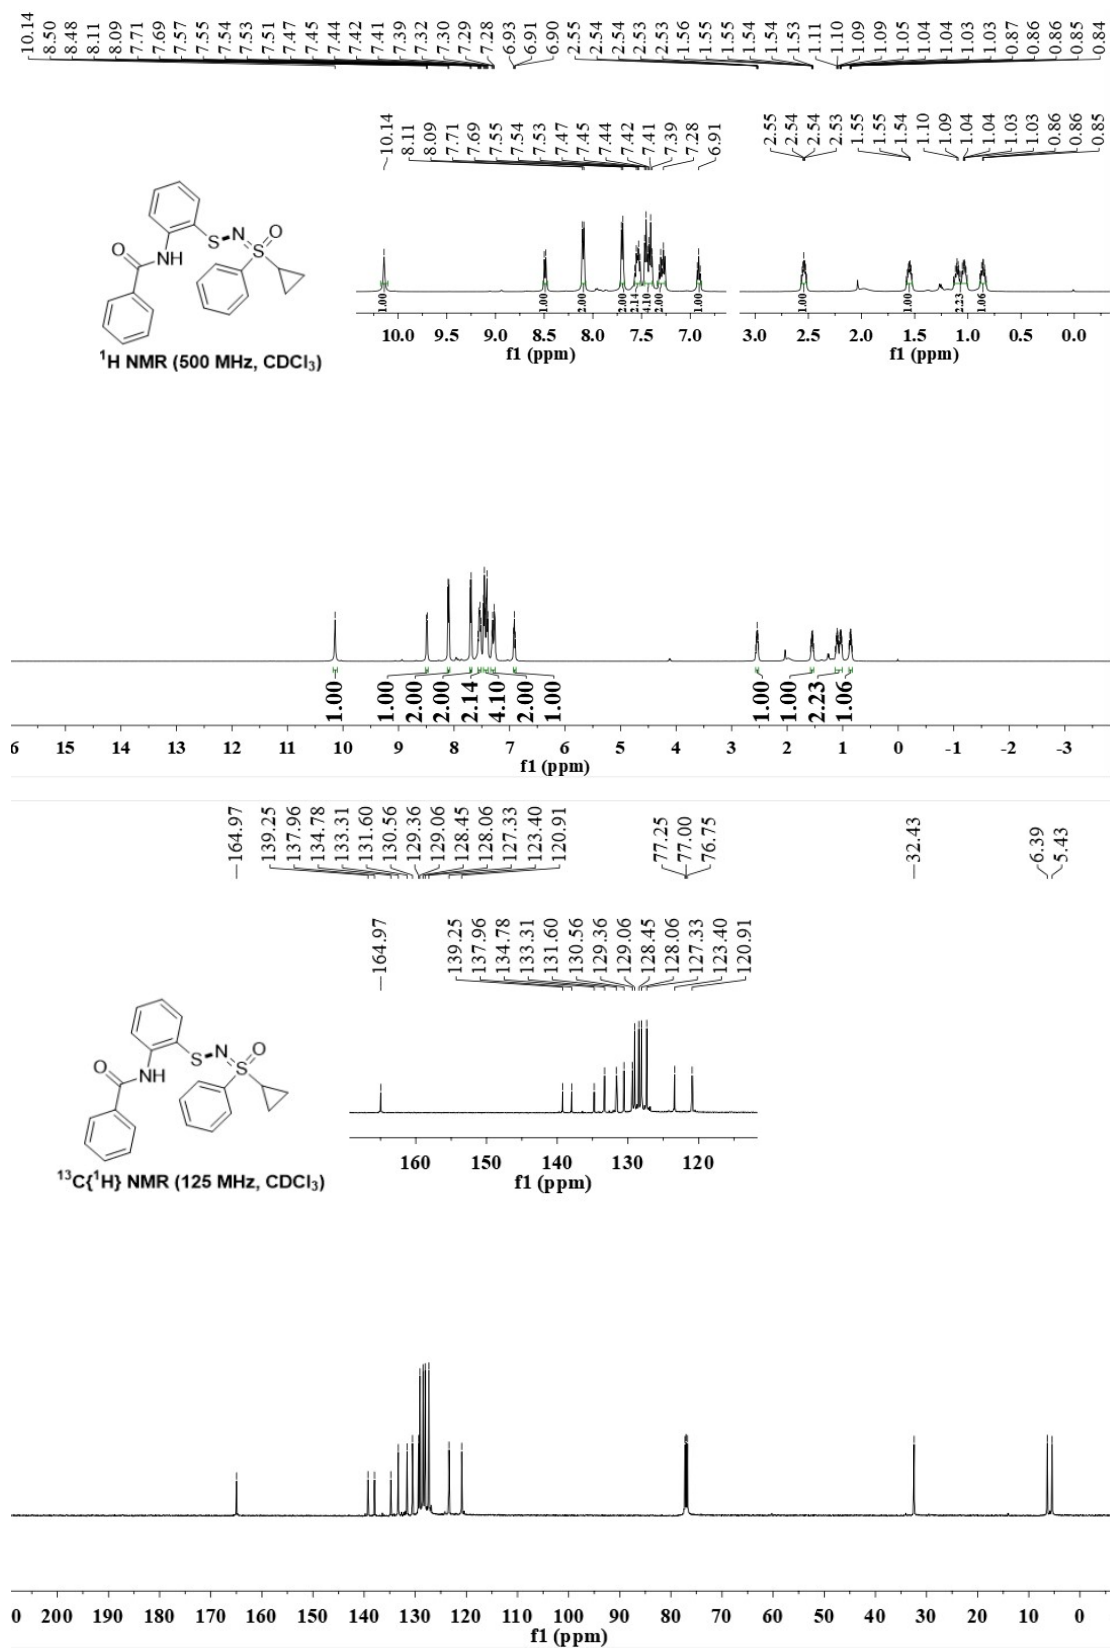

*N*-2-(((Methyl(oxo)(p-tolyl)-λ<sup>6</sup>-sulfaneylidene)amino)thio)phenyl)benzamide (4b)

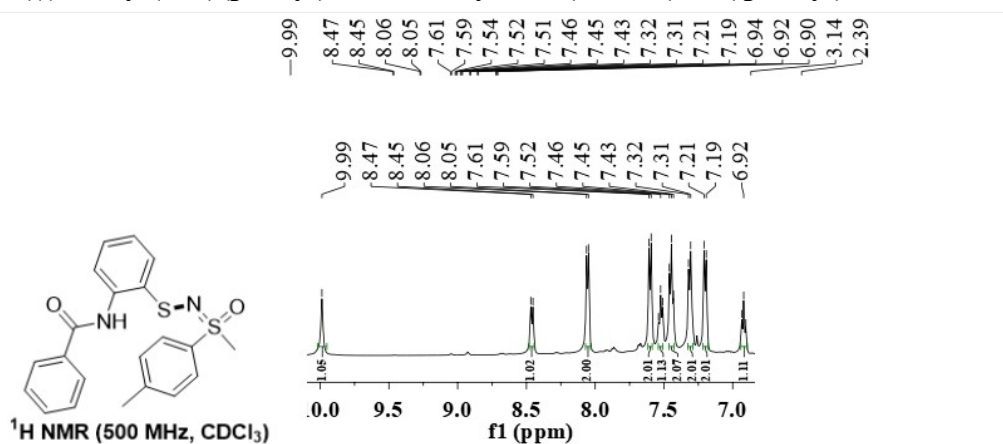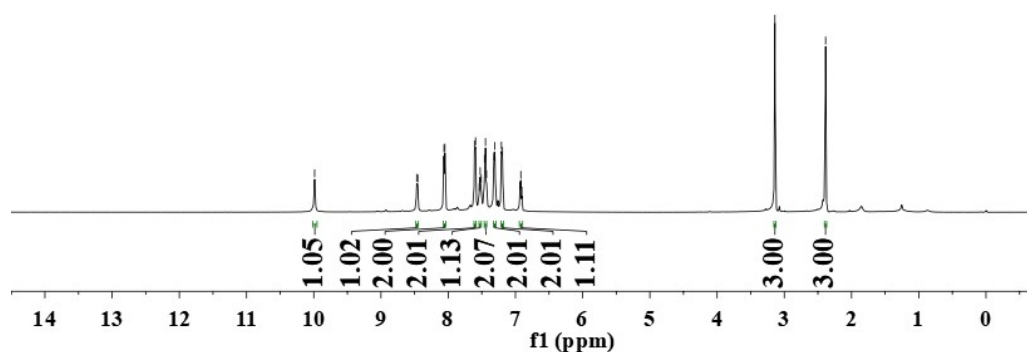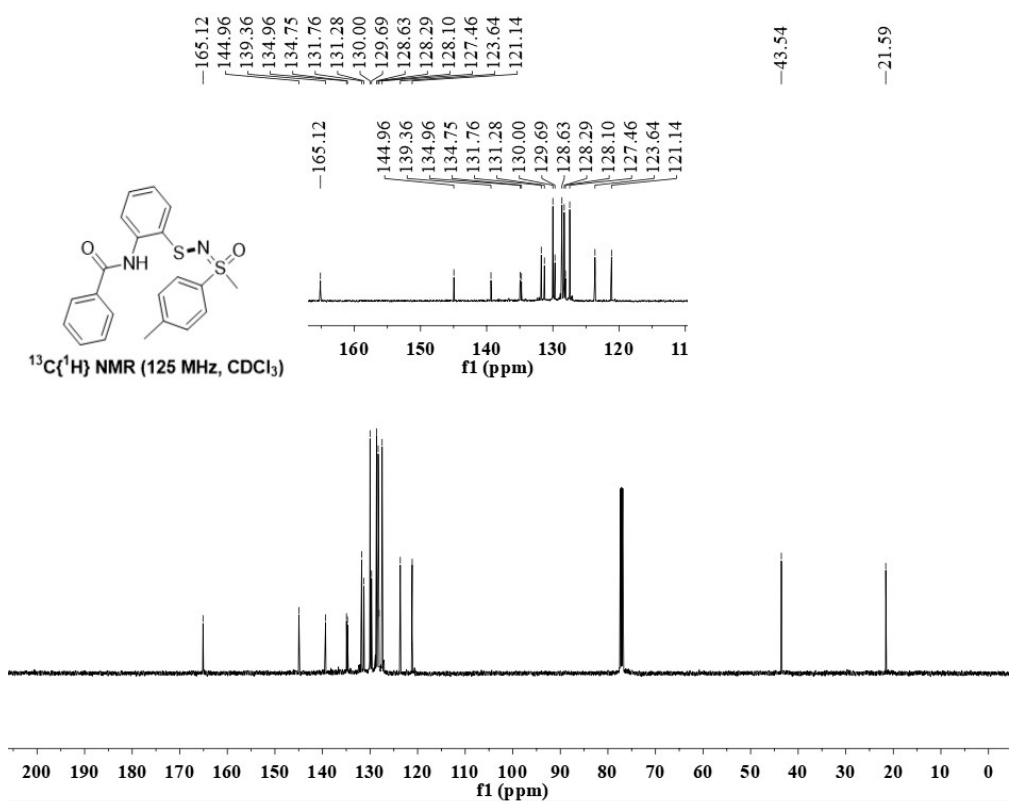

***N*-2-((((2-Chlorophenyl)(methyl)oxo)- $\lambda^6$ -sulfaneylidene)amino)thio)phenyl)-benzamide (4c)**

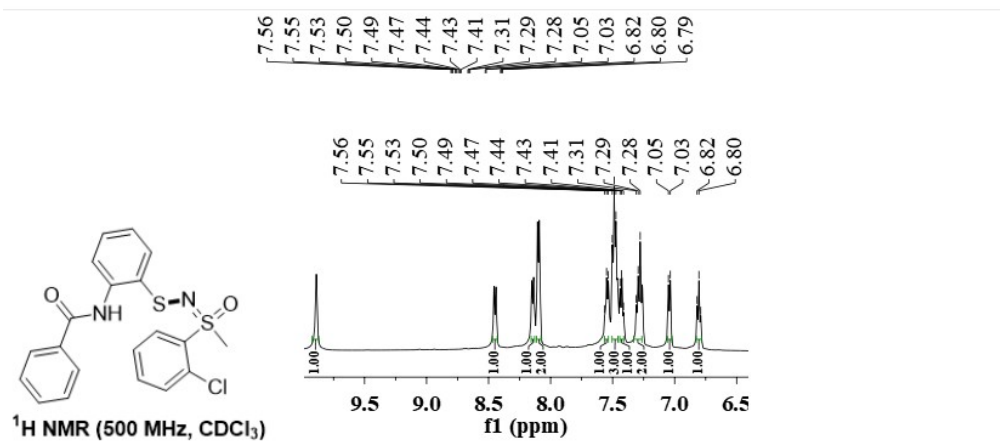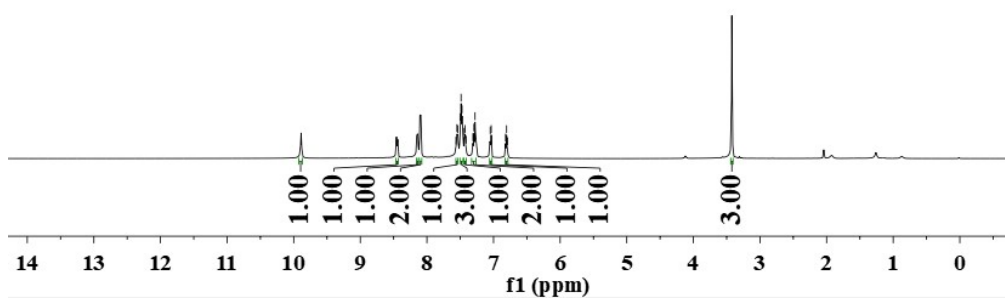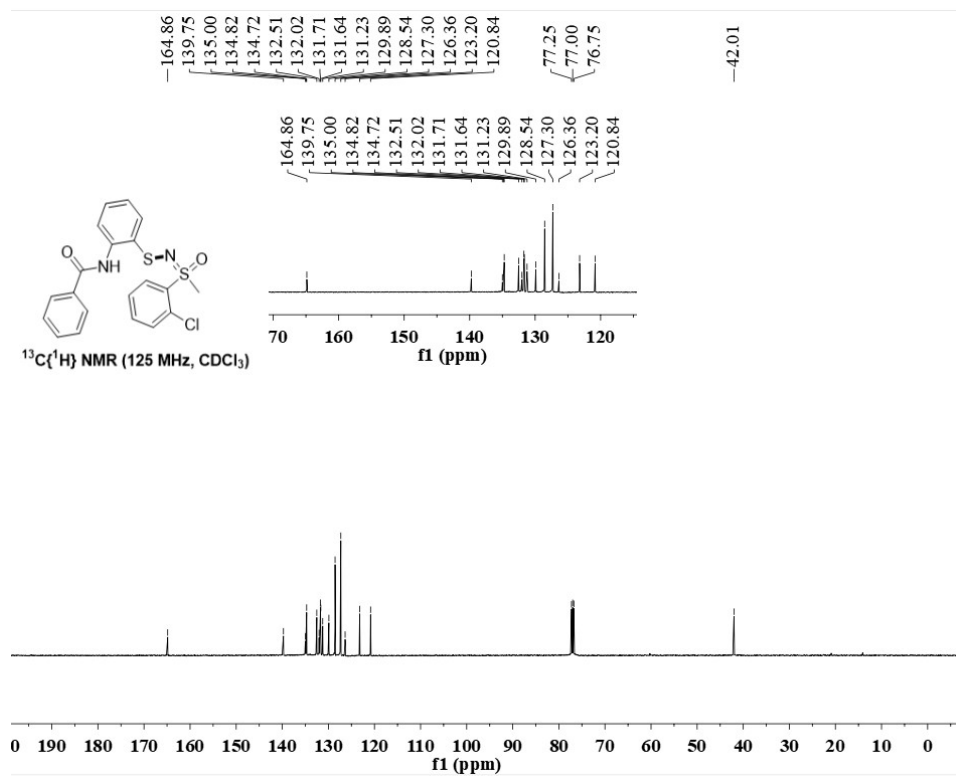

**4-Chloro-N-(2-(((methyl(oxo)(p-tolyl)- $\lambda^6$ -sulfaneylidene)amino)thio)phenyl)-benzamide (4d)**

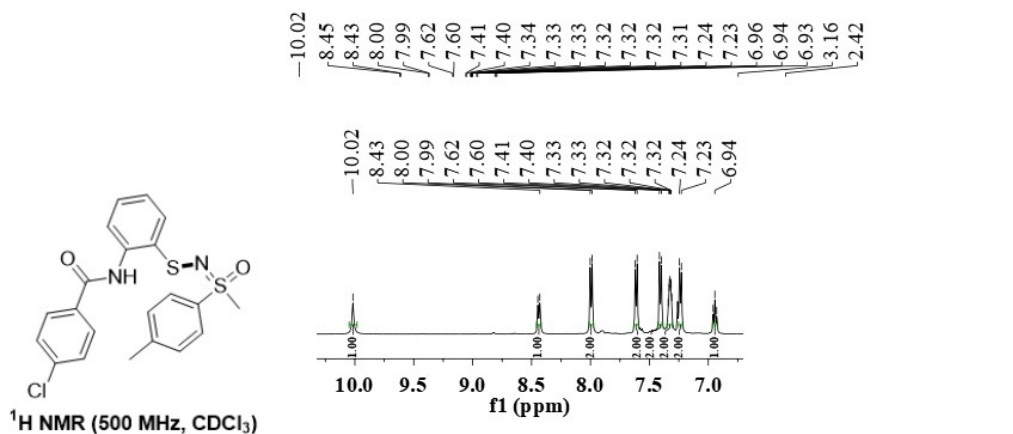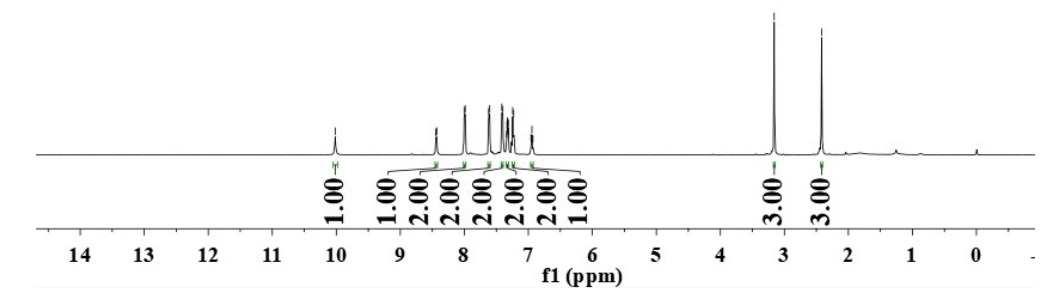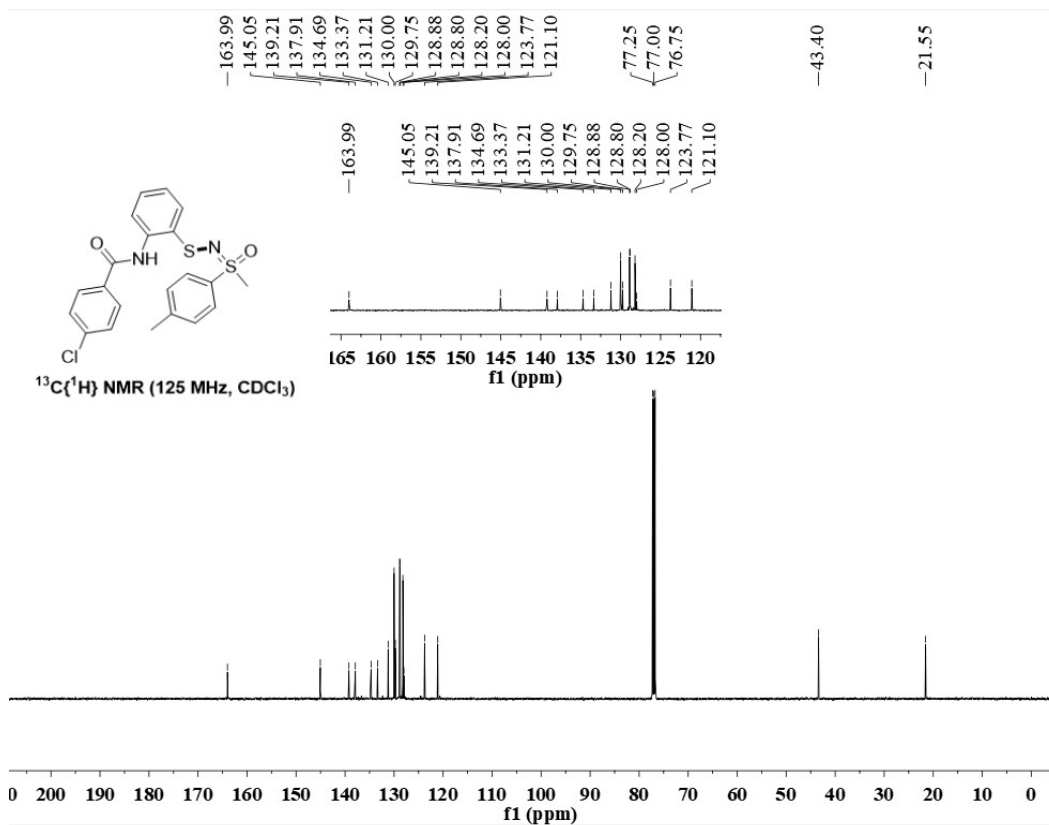

**4-Chloro-N-(2-(((cyclopropyl(oxo)(phenyl)-λ<sup>6</sup>-sulfaneylidene)amino)thio)phenyl)-benzamide (4e)**

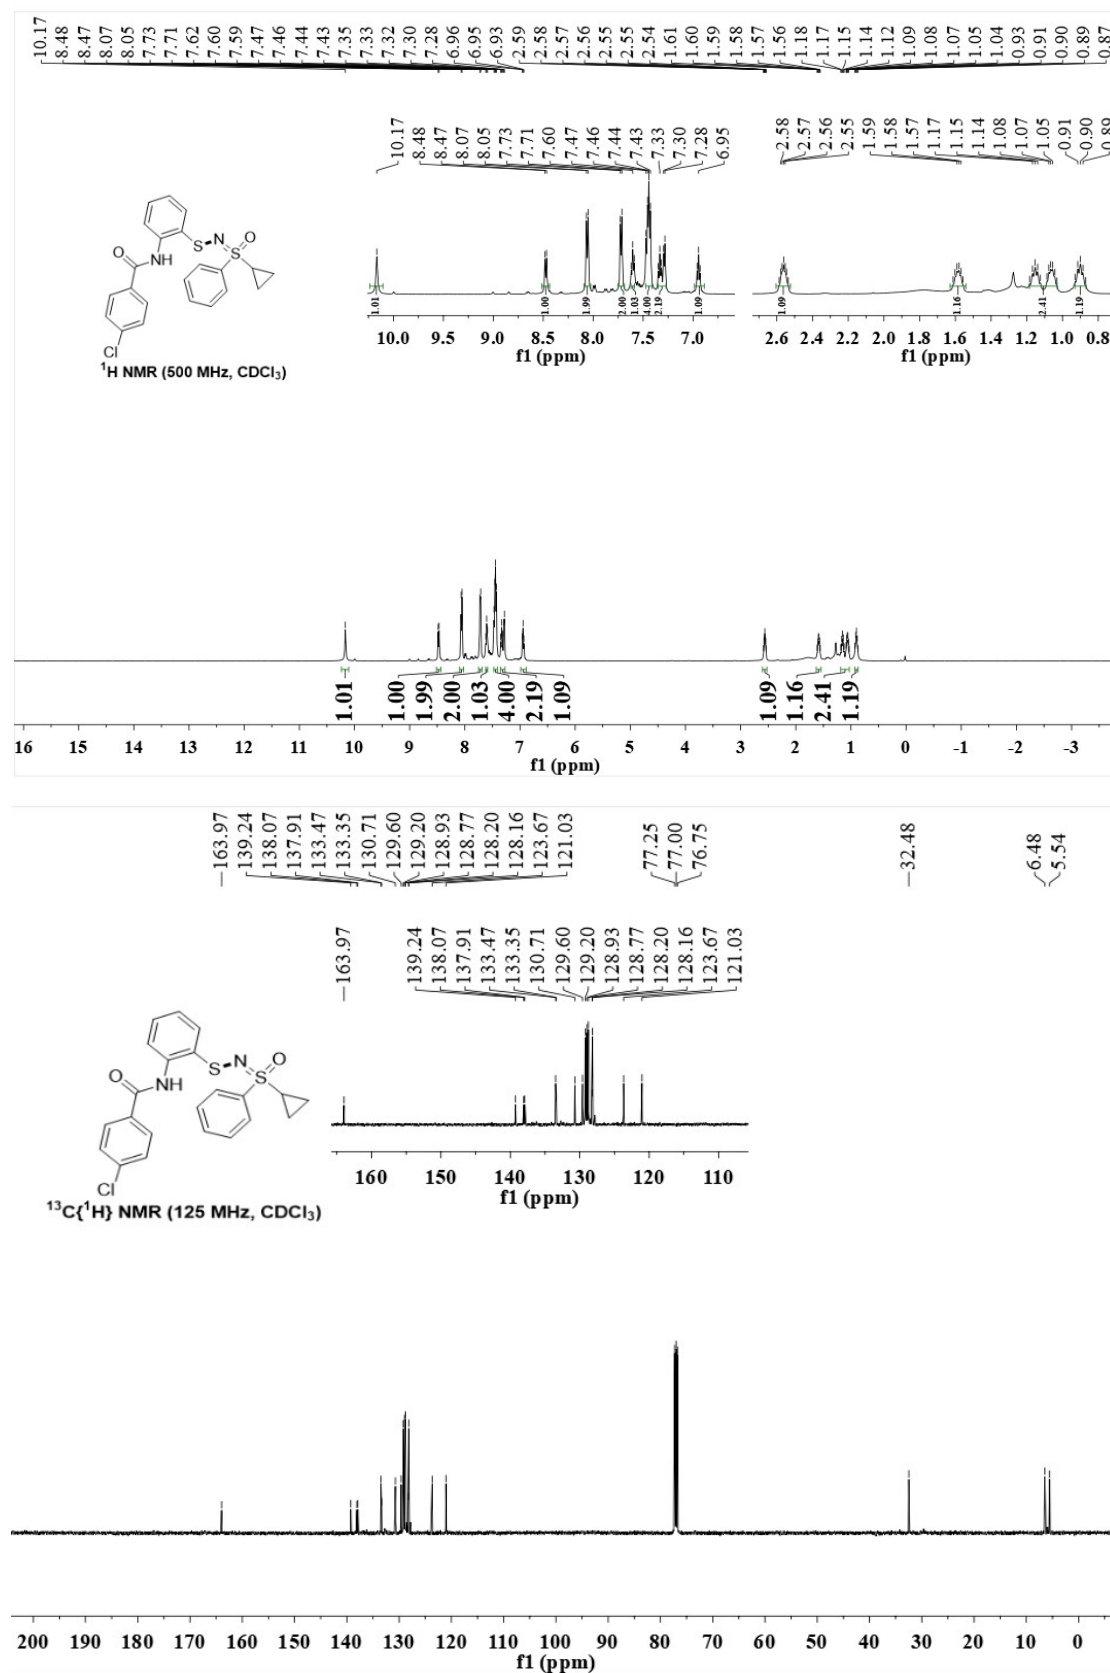



**4-Chloro-N-(2-(((2-chlorophenyl)(methyl)(oxo)- $\lambda^6$ -sulfaneylidene)amino)thio)-phenyl)benzamide (4f)**

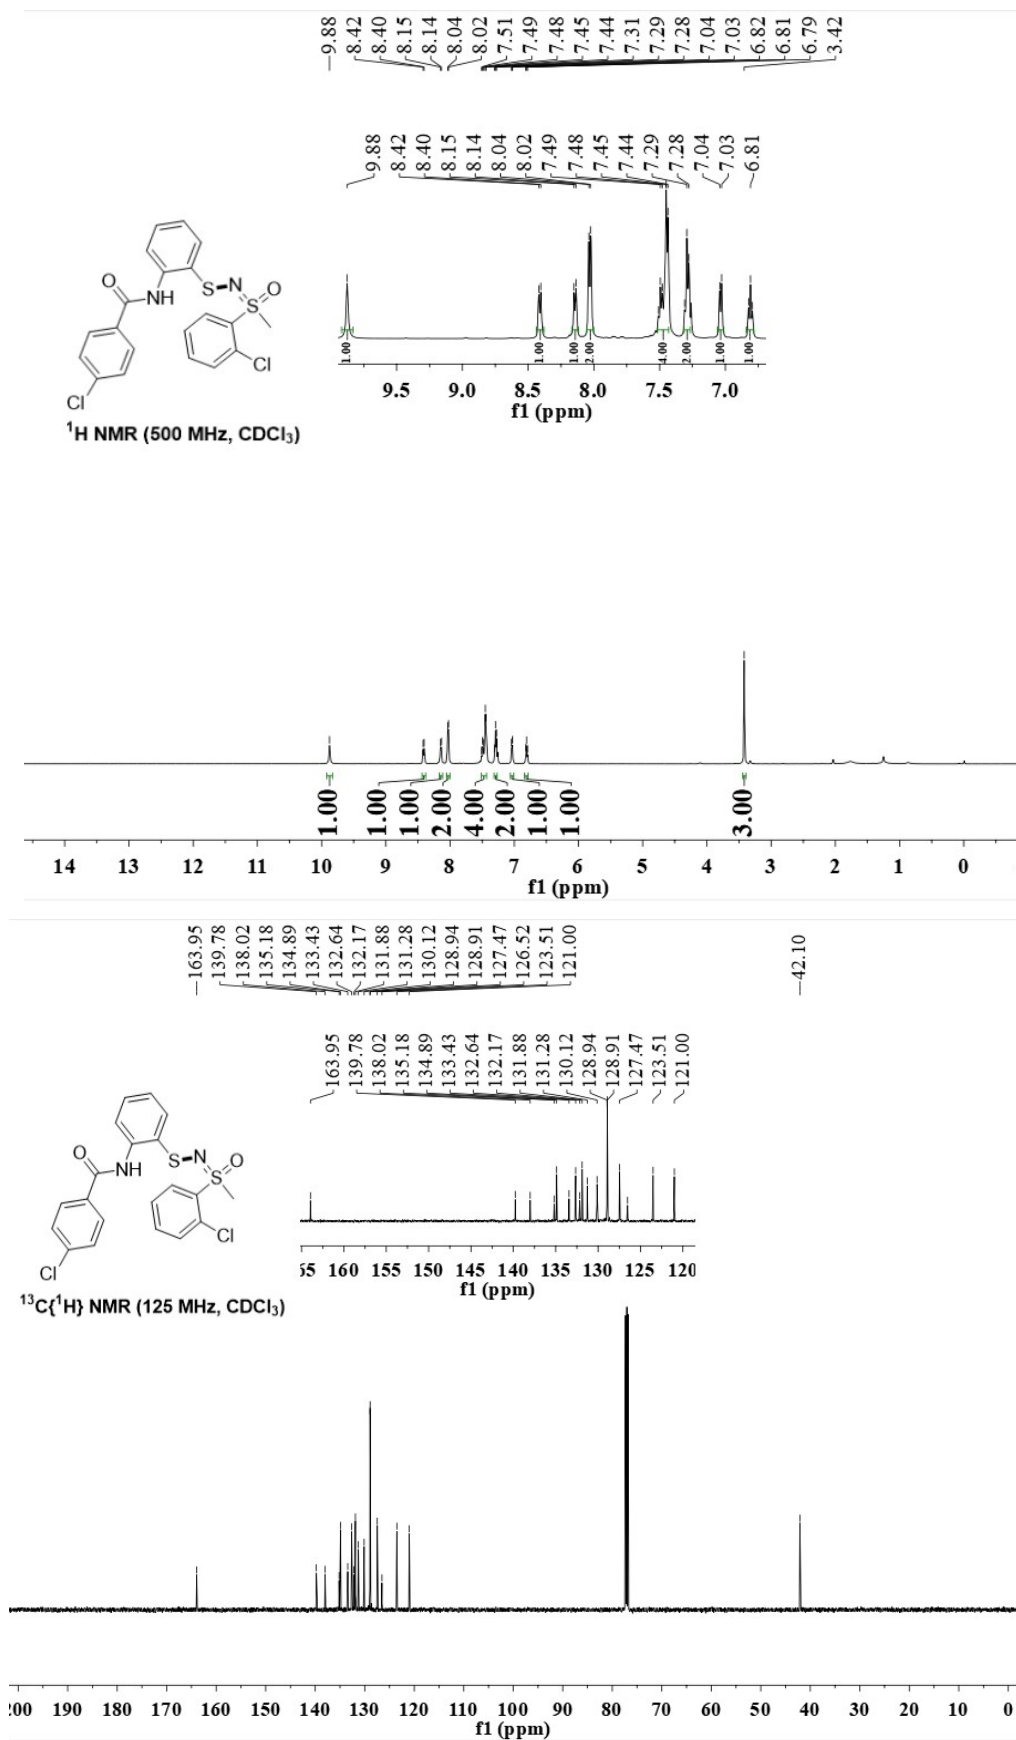

**6-Chloro-N-(2-(((methyl(oxo)(p-tolyl)- $\lambda^6$ -sulfaneylidene)amino)thio)phenyl)-nicotinamide (4g)**

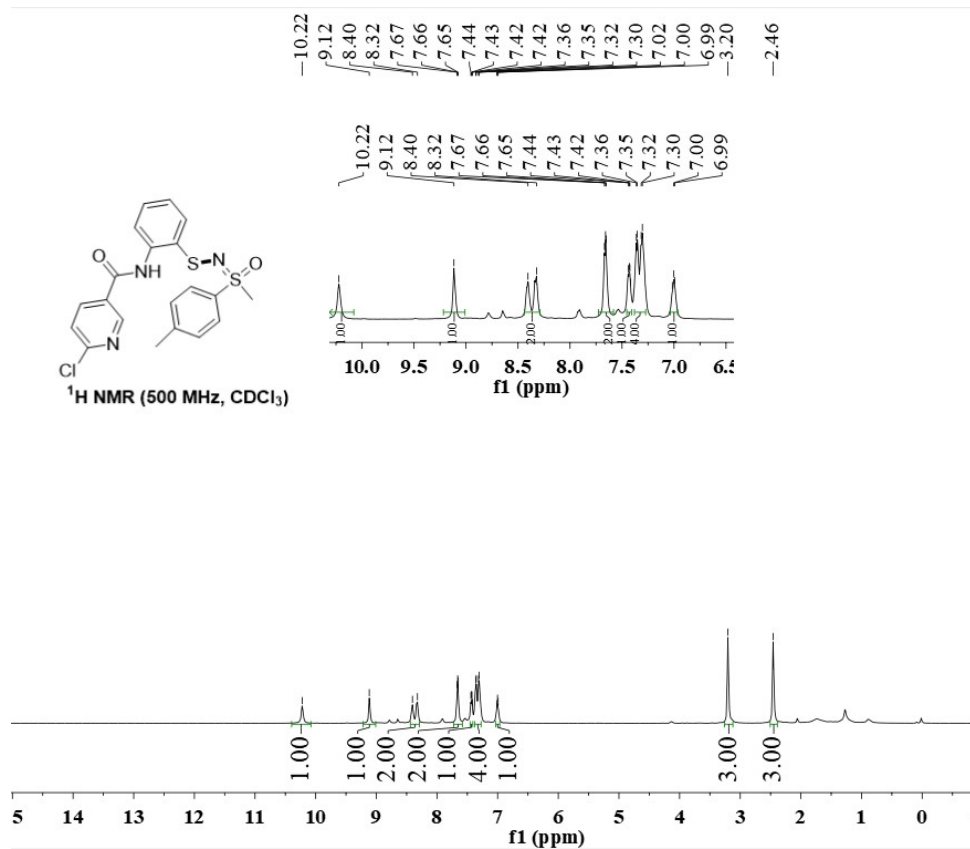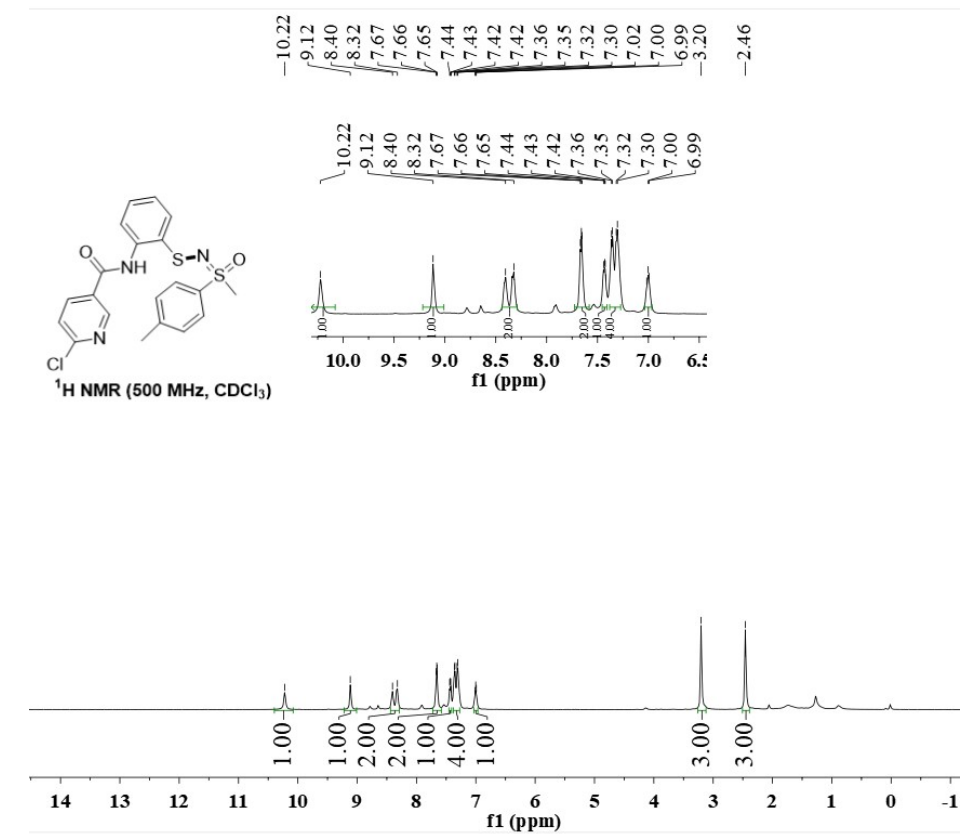

**6-Chloro-N-(2-(((2-chlorophenyl)(methyl)(oxo)- $\lambda^6$ -sulfanylidene)amino)thio)-phenyl)nicotinamide (4h)**

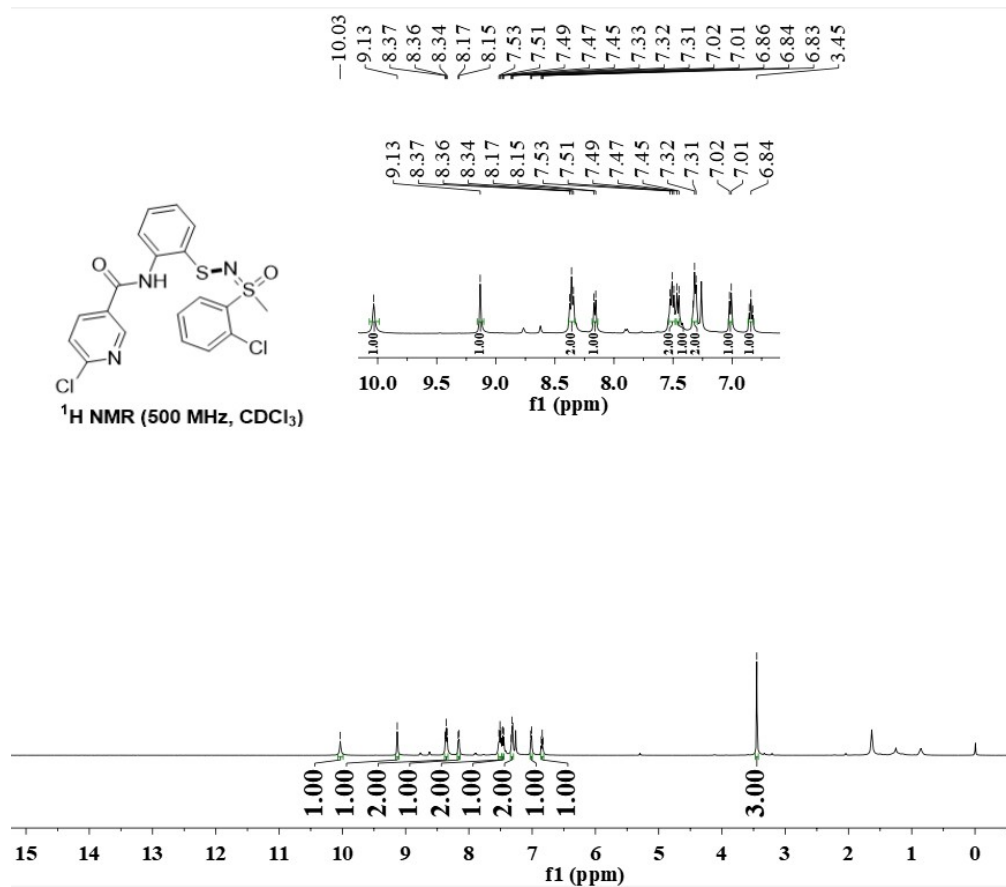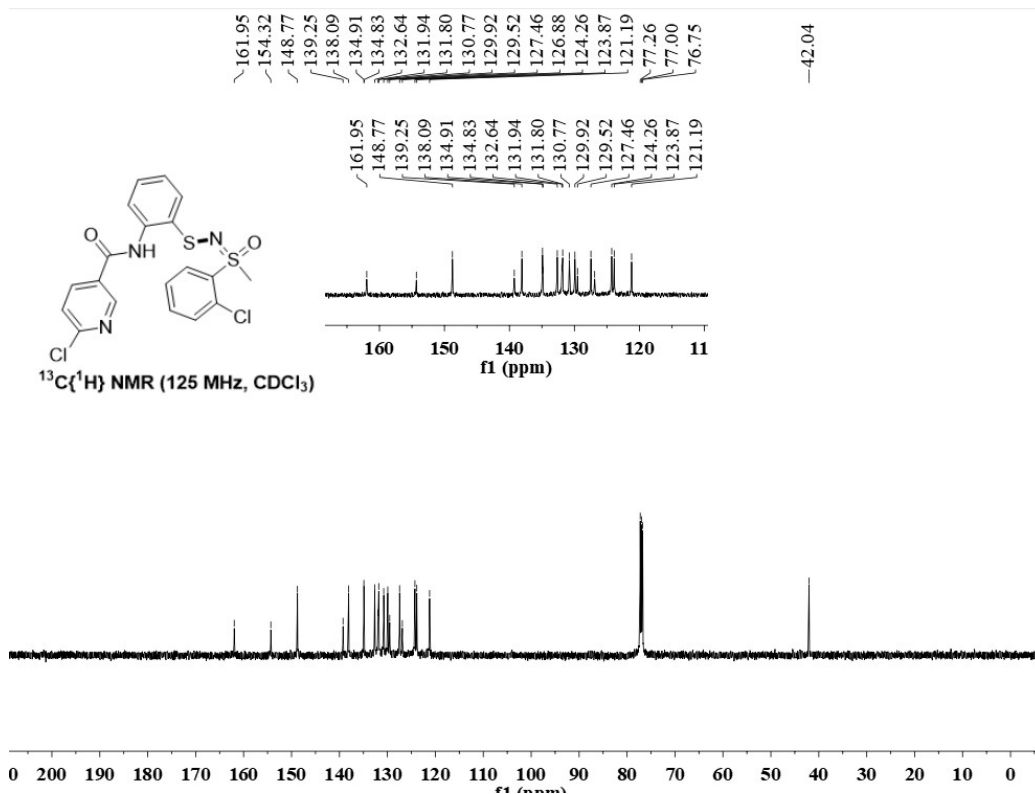

Supplement: d3nj05205b1.pdf [file d3nj05205b1.pdf]
